# Supplementary material for: Visible light-promoted dihydroxylation of styrenes with water and dioxygen
Source: Royal Society of Chemistry journal article supplement (doi:10.1039/c7cc06745c), 2017-01-01

## Visible Light-Promoted Dihydroxylation of Styrenes with Water and Dioxygen

Bo Yang and Zhan Lu\*

Department of chemistry, Zhejiang University, Hangzhou 310027, China

|              |                                                             |            |
|--------------|-------------------------------------------------------------|------------|
| <b>I.</b>    | <b>General Information</b>                                  | <b>S1</b>  |
| <b>II.</b>   | <b>Procedures for Synthesis of Alkenes</b>                  | <b>S2</b>  |
| <b>III.</b>  | <b>General Procedures A for Dihydroxylation of Styrenes</b> | <b>S5</b>  |
| <b>IV.</b>   | <b>Transformations of vicinal Alcohols</b>                  | <b>S18</b> |
| <b>V.</b>    | <b>Mechanistic Studies</b>                                  | <b>S21</b> |
| <b>VI.</b>   | <b>General Procedures B for Dioxylation of Styrenes</b>     | <b>S23</b> |
| <b>VII.</b>  | <b>References</b>                                           | <b>S27</b> |
| <b>VIII.</b> | <b>NMR Spectra</b>                                          | <b>S29</b> |

### **I. General Information**

THF was distilled from sodium benzophenoneketyl prior to use. DCM, NEt<sub>3</sub> and *i*Pr<sub>2</sub>NEt were distilled from calcium hydride. Alcohols and MeCN was used directly. The Acr<sup>+</sup>MesClO<sub>4</sub><sup>-</sup> was prepared according to the literature.<sup>1</sup> Unless otherwise noted, all the corresponding ketones from suppliers were used directly without further purification. NMR spectra were recorded on a Bruker-400 instrument. <sup>1</sup>H NMR chemical shifts were referenced to the tetramethylsilane (0 ppm), <sup>13</sup>C NMR chemical shifts were referenced to the solvent resonance (77.00 ppm, CDCl<sub>3</sub>). The following abbreviations (or combinations thereof) were used to explain multiplicities: s = singlet, d = doublet, t = triplet, m = multiplet, br = broad, q = quadruplet. IR spectra were recorded on a Perkin-Elmer Spectrum One FTIR spectrometer with diamond ATR accessory. High-resolution

mass spectra (HRMS) were recorded on EI-TOF or ESI-TOF (electrospray ionization-time of flight). Unless noted, all the alkenes were prepared according to the general procedures using the corresponding ketones through wittig reaction.

## II. Procedures for Synthesis of Alkenes

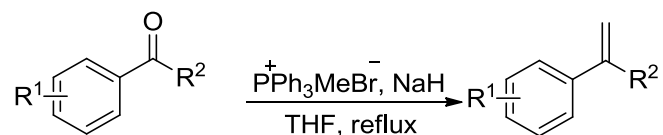

### A general procedure to synthesis of alkenes.

To a solution of  $\text{PPh}_3\text{MeBr}$  (36 mmol) in THF (70 mL) was added NaH (60%, 1.1 equiv.), the reaction mixture was refluxed for 1 h. Then the corresponding ketones (30 mmol) in THF (20 mL) were added dropwise at 0 °C. The mixture was refluxed overnight. When the starting material was consumed (monitored by TLC), the reaction mixture was diluted by petroleum ether and filtered through a pad of silica gel. The filtrate was concentrated to give a crude product which was distilled or purified through flash column chromatography to obtain the desired product. The known products were identical to the literature.

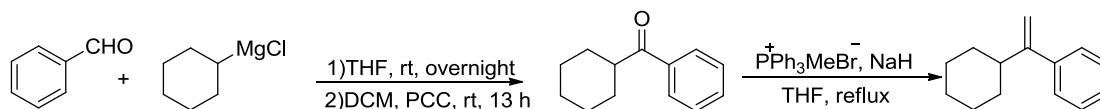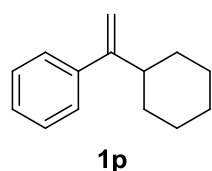

**(1-cyclohexylvinyl)benzene (1p).** <sup>2</sup> To a 100 mL overdried flask,

benzaldehyde (5.1 mL, 50 mmol) and THF (50 mL) were added.

Cyclohexylmagnesium chloride (1.3 M in THF) (42 mL, 60 mmol) were

added dropwise. Then the reaction mixture was stirred at rt overnight. The mixture was quenched by saturated  $\text{NH}_4\text{Cl}$  solution, diluted by  $\text{Et}_2\text{O}$  and filtered through a short pad of celite. The filtration was concentrated in *vacuo* to obtain the crude product which was purified by

chromatography through silica gel to obtain the corresponding ketone (4.7545 g, 25.3 mmol, 51% yield) as a colorless oil.  $^1\text{H NMR}$  (400 MHz,  $\text{CDCl}_3$ )  $\delta$  7.96-7.91 (m, 2H), 7.57-7.50 (m, 1H), 7.49-7.42 (m, 2H), 3.31-3.21 (m, 1H), 1.95-1.70 (m, 4H), 1.78-1.69 (m, 1H), 1.56-1.23 (m, 5H).

To a solution of  $\text{PPh}_3\text{MeBr}$  (11.17 g, 31.3 mmol) in THF (70 mL) was added NaH (60%, 1.2046 g, 30 mmol), the reaction mixture was refluxed for 1 h, the ketone (3.7094 g, 20 mmol) obtained above in THF (20 mL) were added dropwise at  $0^\circ\text{C}$  and then the reaction was refluxing overnight. When the starting material was consumed (monitored by TLC), the reaction was diluted by petroleum ether and filtered through a short pad of silica gel. The filtration was concentrated and distilled to obtain the product (2.4688 g, 13.3 mmol, 67% yield) as a colorless oil.  $^1\text{H NMR}$  (400 MHz,  $\text{CDCl}_3$ )  $\delta$  7.35-7.21 (m, 5H), 5.12 (s, 1H), 5.00 (s, 1H), 2.41 (t,  $J = 11.2$  Hz, 1H), 1.89-1.65 (m, 5H), 1.39-1.05 (m, 5H).

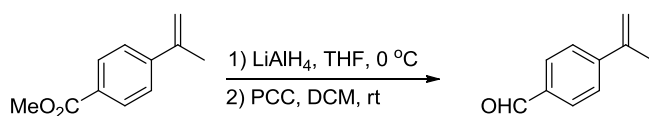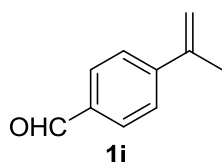

**4-(prop-1-en-2-yl)benzaldehyde (1i).**<sup>3</sup>To a over-dried flask cooled under  $\text{N}_2$  atmosphere, methyl 4-(prop-1-en-2-yl)benzoate (1.4057 g, 8.0mmol) and THF (20 mL) were added,  $\text{LiAlH}_4$  (0.1521 g, 4.0 mmol) in THF (5 mL) was

added dropwise at  $0^\circ\text{C}$ . The mixture was stirred overnight at  $0^\circ\text{C}$ . NaOH (1.0 M, 4 mL) was added slowly followed by addition of  $\text{H}_2\text{O}$  (10 mL). The mixture was filtrated, and the filtration was extracted by  $\text{Et}_2\text{O}$  and the combined organic layers were dried over  $\text{Na}_2\text{SO}_4$ . After filtration, the solvent was removed and the crude product was dissolved in DCM (50 mL), PCC (1.7411 g, 8 mmol) was added and stirred overnight. The reaction mixture was monitored by TLC. When the starting material was consumed, the mixture was diluted with  $\text{Et}_2\text{O}$  and filtered through a pad of

silica gel. The filtrate was condensed and the residue was purified by column chromatography to obtain **1i** (0.4413 g, 2.7 mmol, 34% yield) as a colorless oil.  $^1\text{H}$  NMR (400 MHz,  $\text{CDCl}_3$ )  $\delta$  10.00 (s, 1H), 7.84 (d,  $J = 8.4$  Hz, 2H), 7.61 (d,  $J = 8.0$  Hz, 2H), 5.51 (s, 1H), 5.26-5.23 (m, 1H), 2.19 (s, 3H);  $^{13}\text{C}$  NMR (101 MHz,  $\text{CDCl}_3$ )  $\delta$  191.8, 147.2, 142.3, 135.3, 129.8, 126.0, 115.4, 21.6.

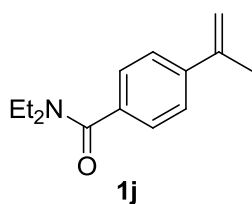

***N,N*-diethyl-4-(prop-1-en-2-yl)benzamide (1j)**. To a overdried flask cooled under  $\text{N}_2$ , corresponding acid (649.6 mg, 4.0 mmol) and  $\text{SOCl}_2$  (2.4 mL, 32.8 mmol) was added at  $0^\circ\text{C}$ . Then the mixture was stirred at

room temperature for 3 h. The excess  $\text{SOCl}_2$  was evaporated in vacuo to obtain the crude acyl chloride. The obtained acyl chloride was transferred to a solution of diethylamine (1.96 mL, 19.0 mmol) in  $\text{Et}_2\text{O}$  (20 mL). The reaction mixture stirred overnight. Water was added to quench the reaction and extracted by DCM. The combined organic layers were dried by anhydrous  $\text{Na}_2\text{SO}_4$ . After filtered, the filtration was concentrated and the residue was purified by column chromatography to obtain **1j** (757.3 mg, 3.5 mmol, 87% yield) as a colorless oil. IR  $\nu$  2974, 1628, 1428,  $1380\text{ cm}^{-1}$ ;  $^1\text{H}$  NMR (400 MHz,  $\text{CDCl}_3$ )  $\delta$  7.49 (d,  $J = 8.4$  Hz, 2H), 7.34 (d,  $J = 8.4$  Hz, 2H), 5.41 (s, 1H), 5.15-5.11 (m, 1H), 3.63-3.16 (m, 4H), 2.16 (s, 3H), 1.34-1.02 (m, 6H);  $^{13}\text{C}$  NMR (101 MHz,  $\text{CDCl}_3$ )  $\delta$  171.1, 142.5, 141.9, 136.1, 126.3, 125.4, 113.2, 43.2, 39.2, 21.7, 14.2, 14.3; HRMS (EI-TOF) Calcd for  $\text{C}_{14}\text{H}_{19}\text{NO}$   $[\text{M}]^+$ : 217.1467; Found 217.1468.

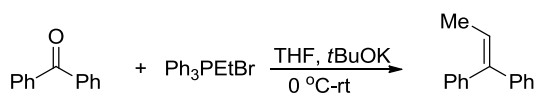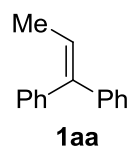

**prop-1-ene-1,1-diyldibenzene (1aa)**.<sup>4</sup> To a 250 mL round flask,

Ethyltriphenylphosphonium bromide (11.17 g, 30 mmol) and THF (100 mL) were added at room temperature. After cooled to 0 °C, *t*BuOK (3.45 g, 30 mmol) was added and the reaction mixture was stirred for 2 h. Then benzophenone (3.65 g, 20 mmol) was added and stirred at 50 °C overnight. The reaction mixture was diluted with petroleum ether and filtered through a short pad of silica gel. The filtrate was condensed and the residue was purified by column chromatography to obtain **1aa** (2.5992 g, 13.4 mmol, 67% yield) as a white solid. <sup>1</sup>H NMR (400 MHz, CDCl<sub>3</sub>) δ 7.40-7.33 (m, 2H), 7.32-7.15 (m, 8H), 6.17 (q, *J* = 7.2 Hz, 1H), 1.76 (d, *J* = 6.8 Hz, 3H).

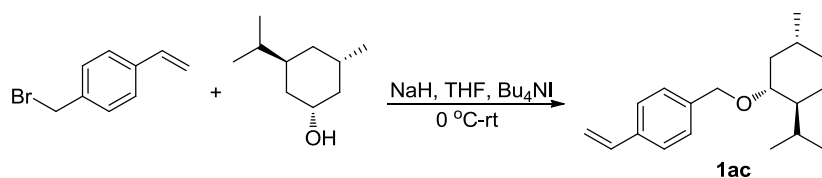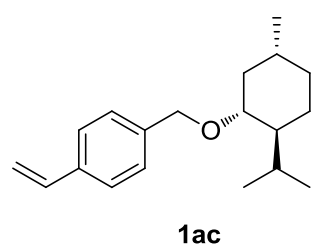

1-(((1*R*,2*S*,5*R*)-2-isopropyl-5-methylcyclohexyl)oxy)methyl-4-vinylbenzene (**1ac**). Prepared according to a similar procedure<sup>5</sup> using alkene (2.9560 g, 15.0 mmol), alcohol (2.5781 g, 16.5 mmol), NaH (60 wt%, 0.8806 g, 22.0 mmol), Bu<sub>4</sub>NI (775.7 mg, 2.1 mmol) and

THF (45 mL) as substrates to afford **1ac**. IR  $\nu$  3392, 2953, 2923, 2865, 1457, 1094 cm<sup>-1</sup>; <sup>1</sup>H NMR (400 MHz, CDCl<sub>3</sub>) δ 7.38 (d, *J* = 8.0 Hz, 2H), 7.30 (d, *J* = 8.0 Hz, 2H), 6.71 (dd, *J* = 17.6, 10.8 Hz, 1H), 5.73 (d, *J* = 17.6 Hz, 1H), 5.22 (d, *J* = 10.8 Hz, 1H), 4.64 (d, *J* = 11.6 Hz, 1H), 4.39 (d, *J* = 11.6 Hz, 1H), 3.16 (td, *J* = 10.8, 4.0 Hz, 1H), 2.37-2.23 (m, 1H), 2.23-2.13 (m, 1H), 1.72-1.58 (m, 2H), 1.33-1.22 (m, 1H), 1.03 -0.81 (m, 10H), 0.71 (d, *J* = 6.8 Hz, 3H); <sup>13</sup>C NMR (101 MHz, CDCl<sub>3</sub>) δ 138.8, 136.7, 136.6, 128.0, 126.1, 113.5, 78.7, 70.1, 48.3, 40.3, 34.6, 31.6, 25.5, 23.2, 22.4, 21.0, 16.1; HRMS (EI-TOF) Calcd for C<sub>19</sub>H<sub>28</sub>O [M]<sup>+</sup>:272.2140; Found 272.2139.

## II. General procedure A for dihydroxylation of styrenes

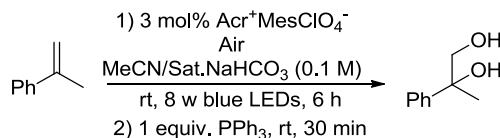

To a 50 mL flask,  $\text{Acr}^+\text{MesClO}_4^-$  (0.009 mmol), **1** (0.3 mmol),  $\text{Sat.NaHCO}_3$  (0.25 mL) and MeCN (2.75 mL) were added sequentially under air. The reaction mixture was irradiated by 8W blue LEDs at a distance of 10 cm for 6 h. To the flask,  $\text{PPh}_3$  (1 equiv.) was added and stirred for 30 min at room temperature. The reaction mixture was then diluted with  $\text{Et}_2\text{O}$  and filtered through a short pad of silica using  $\text{Et}_2\text{O}$  and EA. The filtrate was concentrated *in vacuo* and purified by flash chromatography on silica gel to afford **2**.

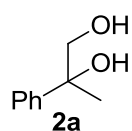

**2-phenylpropane-1,2-diol (2a)**<sup>6</sup> Prepared according to the general A procedure employing  $\text{Acr}^+\text{MesClO}_4^-$  (3.7 mg, 0.009 mmol), **1a** (34.9 mg, 0.29 mmol),  $\text{Sat.NaHCO}_3$  (0.25 mL), MeCN (2.75 mL) and  $\text{PPh}_3$  (ca. 1 equiv.) to afford **2a** (39.0 mg, 0.26 mmol, 87% yield) as a colourless oil using PE/EA (2:1) as eluent.  $^1\text{H}$  NMR (400 MHz,  $\text{CDCl}_3$ )  $\delta$  7.43 (dd,  $J = 8.4, 1.2$  Hz, 2H), 7.38-7.31 (m, 2H), 7.29-7.23 m, 1H), 3.75 (d,  $J = 11.2$  Hz, 1H), 3.59 (d,  $J = 10.4$  Hz, 1H), 2.97 (br s, 1H), 2.42 (br s, 1H), 1.50 (s, .3H);  $^{13}\text{C}$  NMR (101 MHz,  $\text{CDCl}_3$ )  $\delta$  144.9, 128.3, 127.1, 125.0, 74.8, 70.93, 25.9.

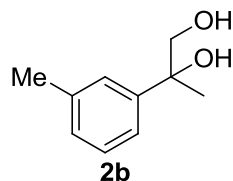

**2-(m-tolyl)propane-1,2-diol (2b)**<sup>8</sup> Prepared according to the general procedure A employing  $\text{Acr}^+\text{MesClO}_4^-$  (3.8 mg, 0.009 mmol), **1b** (38.1 mg, 0.29 mmol),  $\text{Sat.NaHCO}_3$  (0.25 mL), MeCN (2.75 mL) and  $\text{PPh}_3$  (ca. 1 equiv.) to afford **2b** (31.5 mg, 0.19 mmol, 66% yield) as a white solid using PE/EA (2:1) as eluent.  $^1\text{H}$  NMR (400 MHz,  $\text{CDCl}_3$ )  $\delta$  7.28-7.19 (m, 3H), 7.11-7.05 (m, 1H), 3.76 (dd,  $J = 10.8, 2.0$

Hz, 1H), 3.60 (dd,  $J = 10.8, 7.2$  Hz, 1H), 2.79 (s, 1H), 2.36 (s, 3H), 2.16 (brs, 1H), 1.50 (s, 3H);

$^{13}\text{C}$  NMR (101 MHz,  $\text{CDCl}_3$ )  $\delta$  144.9, 138.0, 128.3, 127.9, 125.8, 122.0, 74.8, 71.0, 26.0, 21.6.

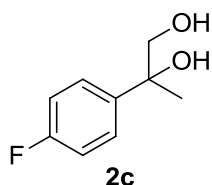

**2-(4-fluorophenyl)propane-1,2-diol (2c)**<sup>7</sup> Prepared according to the general procedure A employing  $\text{Acr}^+\text{MesClO}_4^-$  (4.0 mg, 0.009 mmol), **1c** (42.0 mg, 0.31 mmol),  $\text{Sat.NaHCO}_3$  (0.25 mL), MeCN (2.75 mL) and  $\text{PPh}_3$  (ca. 1

equiv.) to afford **2c** (42.8 mg, 0.25 mmol, 82% yield) as a colourless oil using PE/EA (2:1) as

eluent.  $^1\text{H}$  NMR (400 MHz,  $\text{CDCl}_3$ )  $\delta$  7.44-7.36 (m, 2H), 7.08-6.99 (m, 2H), 3.72 (d,  $J = 11.2$  Hz,

1H), 3.63-3.54 (m, 1H), 2.94 (br s, 1H), 2.37 br (s, 1H), 1.50 (s, 3H);  $^{13}\text{C}$  NMR (101 MHz,  $\text{CDCl}_3$ )

$\delta$  161.9 (d,  $J = 244.0$  Hz), 140.7 (d,  $J = 3.2$  Hz), 126.8 (d,  $J = 7.9$  Hz), 115.09 (d,  $J = 21.1$  Hz),

74.5, 70.9, 26.1 ;  $^{19}\text{F}$  NMR (376 MHz,  $\text{CDCl}_3$ )  $\delta$  -115.92.

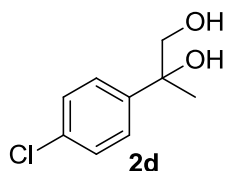

**2-(4-chlorophenyl)propane-1,2-diol (2d)**<sup>8</sup> Prepared according to the general procedure A employing  $\text{Acr}^+\text{MesClO}_4^-$  (3.6 mg, 0.009 mmol), **1d** (48.0 mg, 0.31 mmol),  $\text{Sat.NaHCO}_3$  (0.25 mL) MeCN (2.75 mL) and  $\text{PPh}_3$

(ca. 1 equiv.) to afford **2d** (52.5 mg, 0.28 mmol, 90% yield) as a yellow oil using PE/EA (2:1) as

eluent.  $^1\text{H}$  NMR (400 MHz,  $\text{CDCl}_3$ )  $\delta$  7.39-7.27 (m, 4H), 3.70 (d,  $J = 11.2$  Hz, 1H), 3.57 (d,  $J =$

11.2 Hz, 1H), 3.06 (br s, 1H), 2.54 (br s, 1H), 1.47 (s, 3H);  $^{13}\text{C}$  NMR (101 MHz,  $\text{CDCl}_3$ )  $\delta$  143.5,

133.0, 128.4, 126.6, 74.6, 70.7, 25.9.

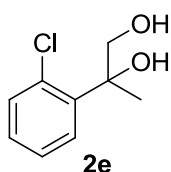

**2-(2-chlorophenyl)propane-1,2-diol (2e)** Prepared according to the general procedure A employing  $\text{Acr}^+\text{MesClO}_4^-$  (5.9 mg, 0.015 mmol), **1e** (45.9 mg,

0.30mmol), Sat.NaHCO<sub>3</sub> (0.25 mL) MeCN (2.75 mL) and PPh<sub>3</sub> (ca. 1 equiv.) to afford **2e**(28.8 mg, 0.15mmol, 51% yield) as a yellow oil using PE/EA (3:1) as eluent. IR  $\nu$ 3408,2928, 1466, 1431, 1038 cm<sup>-1</sup>; <sup>1</sup>H NMR (400 MHz, CDCl<sub>3</sub>)  $\delta$  7.77 (dd, *J* = 8.0, 2.0 Hz, 1H), 7.35 (dd, *J* = 7.6, 1.2 Hz, 1H), 7.29 (td, *J* = 7.6, 1.6 Hz, 1H), 7.21 (td, *J* = 7.6, 2.0 Hz, 1H), 4.27 (d, *J* = 11.2 Hz, 1H), 3.81 (d, *J* = 10.8 Hz, 1H), 3.27 (s, 1H), 2.08 (brs, 1H), 1.66 (s, 3H); <sup>13</sup>C NMR (101 MHz, CDCl<sub>3</sub>)  $\delta$  141.3, 131.3, 130.8, 128.8, 128.6, 127.1, 75.4, 68.1, 23.9; HRMS (EI-TOF) Calcd for C<sub>9</sub>H<sub>9</sub>OCl [M-H<sub>2</sub>O]<sup>+</sup>:168.0342; Found 168.0342.

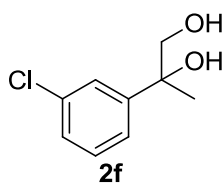

**2-(3-chlorophenyl)propane-1,2-diol (2f)** Prepared according to the general procedure A employing Acr<sup>+</sup>MesClO<sub>4</sub><sup>-</sup> (5.9 mg, 0.015 mmol), **1f** (45.9 mg, 0.30 mmol), Sat.NaHCO<sub>3</sub> (0.25 mL) MeCN (2.75 mL) and PPh<sub>3</sub> (ca. 1

equiv.) to afford **2f**(28.8 mg, 0.15 mmol, 51% yield) as a yellow oil using PE/EA (3:1) as eluent. IR  $\nu$  3372, 2928, 2360, 1470, 1417, 1046 cm<sup>-1</sup>; <sup>1</sup>H NMR (400 MHz, CDCl<sub>3</sub>)  $\delta$  7.46 (s, 1H), 7.33-7.22 (m, 3H), 3.75 (dd, *J* = 11.2, 3.2 Hz, 1H), 3.61 (dd, *J* = 10.8, 6.8 Hz, 1H), 2.82 (s, 1H), 2.13 (br s, 1H), 1.50 (s, 3H); <sup>13</sup>C NMR (101 MHz, CDCl<sub>3</sub>)  $\delta$  147.2, 134.4, 129.7, 127.3, 125.6, 123.3, 74.6, 70.8, 26.0; HRMS (EI-TOF) Calcd for C<sub>9</sub>H<sub>9</sub>OCl [M-H<sub>2</sub>O]<sup>+</sup>:168.0342; Found 168.0339.

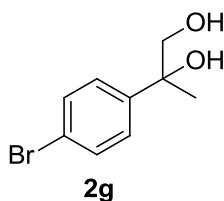

**2-(4-bromophenyl)propane-1,2-diol (2g)**<sup>9</sup> Prepared according to the general procedure A employing Acr<sup>+</sup>MesClO<sub>4</sub><sup>-</sup> (3.9 mg, 0.009 mmol), **1g** (62.0 mg, 0.31 mmol), Sat.NaHCO<sub>3</sub> (0.25 mL) MeCN (2.75 mL) and



PPh<sub>3</sub>(ca. 1 equiv.) to afford **2g**(63.4 mg, 0.27 mmol, 87% yield) as a yellow oil using PE/EA (3:1) as eluent. <sup>1</sup>H NMR (400 MHz, CDCl<sub>3</sub>) δ 7.47 (d, *J* = 8.4 Hz, 2H), 7.30 (d, *J* = 8.0 Hz, 2H), 3.70 (d, *J* = 11.2 Hz, 1H), 3.56 (dd, *J* = 10.4, 4.0 Hz, 1H), 2.98 (br s, 1H), 2.43 (br s, 1H), 1.47 (s, 3H); <sup>13</sup>C NMR (101 MHz, CDCl<sub>3</sub>) δ 144.0, 131.4, 127.0, 121.1, 74.6, 70.7, 25.9.

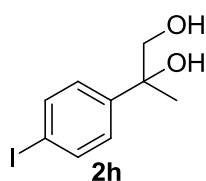

**2-(4-iodophenyl)propane-1,2-diol (2h)** Prepared according to the general procedure A employing Acr<sup>+</sup>MesClO<sub>4</sub><sup>-</sup> (3.5 mg, 0.009 mmol), **1h** (73.9 mg, 0.30mmol), Sat.NaHCO<sub>3</sub> (0.25 mL) MeCN (2.75 mL) and PPh<sub>3</sub> (ca. 1 equiv.)

to afford **2h**(42.0 mg, 0.15mmol, 50% yield) as a yellow oil using PE/EA (2:1) as eluent. IR ν3384, 2927, 1586, 1391, 1042 cm<sup>-1</sup>; <sup>1</sup>H NMR (400 MHz, CDCl<sub>3</sub>) δ 7.67 (d, *J* = 8.4 Hz, 2H), 7.22-7.13 (m, 2H), 3.70 (d, *J* = 10.4 Hz, 1H), 3.63-3.51 (m, 1H), 3.01–2.69 (m, 1H), 2.45–2.01 (m, 1H), 1.47 (s, 3H); <sup>13</sup>C NMR (101 MHz, CDCl<sub>3</sub>) δ 144.7, 137.4, 127.2, 92.8, 74.6, 70.7, 25.9; HRMS (EI-TOF) Calcd for C<sub>9</sub>H<sub>11</sub>IO<sub>2</sub> [M]<sup>+</sup>:277.9804; Found 277.9804.

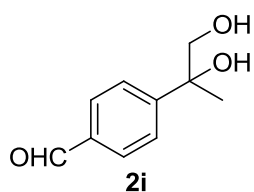

**4-(1,2-dihydroxypropan-2-yl)benzaldehyde (2i)** Prepared according to the general procedure A employing Acr<sup>+</sup>MesClO<sub>4</sub><sup>-</sup> (4.0 mg, 0.009 mmol), **1i** (44.3 mg, 0.30mmol), Sat.NaHCO<sub>3</sub> (0.25 mL) MeCN (2.75 mL). and

PPh<sub>3</sub> (ca. 1 equiv.) to afford **2i**(28.3 mg, 0.16mmol, 52% yield) as a white solid using PE/EA (1:1) as eluent. IR ν 3409, 2924, 2856, 1695, 1608, 1216, 1045 cm<sup>-1</sup>; <sup>1</sup>H NMR (400 MHz, CDCl<sub>3</sub>) δ 9.89 (s, 1H), 7.78 (d, *J* = 8.4 Hz, 2H), 7.56 (d, *J* = 8.4 Hz, 2H), 3.73 (d, *J* = 10.8 Hz, 1H), 3.61 (d, *J* = 10.8 Hz, 1H), 3.01 (brs, 1H), 2.36 (brs, 1H), 1.47 (s, 3H); <sup>13</sup>C NMR (101 MHz, CDCl<sub>3</sub>) δ

192.1, 152.2, 135.2, 129.8, 125.9, 74.9, 70.7, 26.0; HRMS (EI-TOF) Calcd for C<sub>10</sub>H<sub>10</sub>O<sub>2</sub> [M-H<sub>2</sub>O]<sup>+</sup>:162.0681; Found 162.0681.

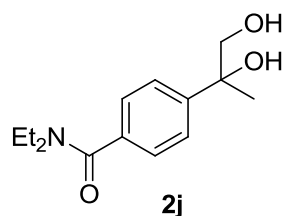

**4-(1,2-dihydroxypropan-2-yl)-N,N-diethylbenzamide (2j)** Prepared according to the general procedure A employing Acr<sup>+</sup>MesClO<sub>4</sub><sup>-</sup> (3.7 mg, 0.009 mmol), **1j** (66.0 mg, 0.30 mmol), Sat.NaHCO<sub>3</sub> (0.25 mL)

MeCN (2.75 mL) and PPh<sub>3</sub> (ca. 1 equiv.) to afford **2j**(44.1 mg, 0.18 mmol, 58% yield) as a colorless oil using DCM/MeOH (20:1) as eluent. IR  $\nu$  3412, 2976, 2933, 1607, 1437, 1289, 1101, 1046 cm<sup>-1</sup>; <sup>1</sup>H NMR (400 MHz, CDCl<sub>3</sub>)  $\delta$  7.42 (d, *J* = 8.4 Hz, 2H), 7.29 (d, *J* = 8.4 Hz, 2H), 3.65 (s, 1H), 3.61–3.40 (m, 5H), 3.26 (d, *J* = 5.6 Hz, 2H), 1.44 (s, 3H), 1.29–1.17 (m, 3H), 1.16–1.05 (s, 3H); <sup>13</sup>C NMR (101 MHz, CDCl<sub>3</sub>)  $\delta$  171.5, 146.8, 135.2, 126.0, 125.3, 74.4, 70.5, 43.3, 39.3, 25.7, 14.1, 12.8; HRMS (EI-TOF) Calcd for C<sub>14</sub>H<sub>21</sub>NO<sub>3</sub> [M]<sup>+</sup>:251.1521; Found 251.1526.

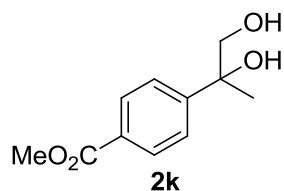

**methyl 4-(1,2-dihydroxypropan-2-yl)benzoate (2k)**<sup>10</sup> Prepared according to the general procedure A employing Acr<sup>+</sup>MesClO<sub>4</sub><sup>-</sup> (3.9 mg, 0.009 mmol), **1k** (54.5 mg, 0.31 mmol), Sat.NaHCO<sub>3</sub> (0.25 mL)

MeCN (2.75 mL) and PPh<sub>3</sub> (ca. 1 equiv.) to afford **2k** (35.6 mg, 0.17 mmol, 55% yield) as a colorless oil using PE/EA (20:1) as eluent. <sup>1</sup>H NMR (400 MHz, CDCl<sub>3</sub>)  $\delta$  8.00 (d, *J* = 8.8 Hz, 2H), 7.52 (d, *J* = 8.4 Hz, 2H), 3.91 (s, 3H), 3.78 (d, *J* = 11.2 Hz, 1H), 3.65 (d, *J* = 10.8 Hz, 1H), 3.01 (br s, 1H), 2.34 (br s, 1H), 1.53 (s, 3H); <sup>13</sup>C NMR (101 MHz, CDCl<sub>3</sub>)  $\delta$  166.9, 150.3, 129.6, 128.9, 125.2, 74.9, 70.7, 52.1, 25.9.

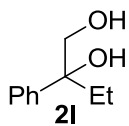

**2-phenylbutane-1,2-diol (2l)**<sup>8</sup> Prepared according to the general procedure A employing  $\text{Acr}^+\text{MesClO}_4^-$  (3.7 mg, 0.009 mmol), **1l** (40.0 mg, 0.30mmol),

Sat.NaHCO<sub>3</sub> (0.25 mL) MeCN (2.75 mL) and PPh<sub>3</sub> (ca. 1 equiv.) to afford **2l** (43.2 mg, 0.26mmol, 86% yield) as a colorless oil using PE/EA (4:1) as eluent. <sup>1</sup>H NMR (400 MHz, CDCl<sub>3</sub>) δ 7.42–7.31 (m, 4H), 7.29-7.22 (m, 1H), 3.79 (d, *J* = 11.2 Hz, 1H), 3.65 (d, *J* = 10.4 Hz, 1H), 2.82 (br s, 1H), 2.24 (brs, 1H), 1.89-1.71 (m, 2H), 0.74 (t, *J* = 7.6 Hz, 3H); <sup>13</sup>C NMR (101 MHz, CDCl<sub>3</sub>) δ 143.1, 128.3, 126.9, 125.6, 77.5, 70.3, 31.1, 7.4.

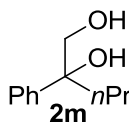

**2-phenylpentane-1,2-diol (2m)**<sup>11</sup> Prepared according to the general procedure A employing  $\text{Acr}^+\text{MesClO}_4^-$  (3.9 mg, 0.009 mmol), **1m** (41.8 mg, 0.29mmol),

Sat.NaHCO<sub>3</sub> (0.25 mL) MeCN (2.75 mL) and PPh<sub>3</sub> (ca. 1 equiv.) to afford **2m** (42.9 mg, 0.24mmol, 83% yield) as a colorless oil using PE/EA (2:1) as eluent. <sup>1</sup>H NMR (400 MHz, CDCl<sub>3</sub>) δ 7.41-7.31 (m, 4H), 7.28-7.21 (m, 1H), 3.77 (dd, *J* = 11.2, 2.4 Hz, 1H), 3.63 (dd, *J* = 10.8, 7.2 Hz, 1H), 2.93 (s, 1H), 2.32 (s, 1H), 1.81-1.63 (m, 2H), 1.37-1.21 (m, 1H), 1.11-0.95 (m, 1H), 0.83 (t, *J* = 7.2 Hz, 3H); <sup>13</sup>C NMR (101 MHz, CDCl<sub>3</sub>) δ 143.5, 128.3, 126.9, 125.5, 77.3, 70.4, 40.8, 16.3, 14.4.

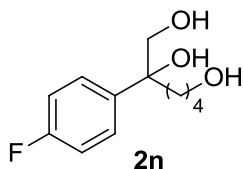

**2-(4-fluorophenyl)hexane-1,2,6-triol (2n)** Prepared according to the general procedure A employing  $\text{Acr}^+\text{MesClO}_4^-$  (4.0 mg, 0.009 mmol), **1n** (58.8 mg, 0.30mmol), Sat.NaHCO<sub>3</sub> (0.25 mL) MeCN (2.75 mL) and PPh<sub>3</sub>

(ca. 1 equiv.) to afford **2n** (43.2 mg, 0.20mmol, 67% yield) as a colorless oil using PE/EA (1:1) to methanol as eluent. IR  $\nu$  3375, 2942, 2873, 1604, 1510, 1228, 1059 cm<sup>-1</sup>; <sup>1</sup>H NMR (400 MHz,

CDCl<sub>3</sub>) δ 7.41-7.32 (m, 2H), 7.04 (dd, *J* = 8.8, 8.4 Hz, 2H), 3.76 (d, *J* = 11.2 Hz, 1H), 3.67 (d, *J* = 11.2 Hz, 1H), 3.57 (t, *J* = 6.4 Hz, 2H), 2.34 (brs, 3H), 1.92-1.71 (m, 2H), 1.54-1.44 (m, 2H), 1.44-1.30 (m, 1H), 1.18-1.02 (m, 1H); <sup>13</sup>C NMR (101 MHz, CDCl<sub>3</sub>) δ 161.8 (d, *J* = 244.1 Hz), 139.1 (d, *J* = 3.2 Hz), 127.2 (d, *J* = 8.0 Hz), 115.2 (d, *J* = 21.1 Hz), 76.9, 70.5, 62.3, 37.9, 32.5, 19.3; <sup>19</sup>F NMR (376 MHz, CDCl<sub>3</sub>) δ -116.08; HRMS (EI-TOF) Calcd for C<sub>12</sub>H<sub>13</sub>FO [M-2H<sub>2</sub>O]<sup>+</sup>:192.0950; Found 192.0947.

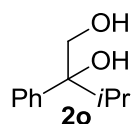

**3-methyl-2-phenylbutane-1,2-diol (2o)**<sup>8</sup> Prepared according to the general procedure A employing Acr<sup>+</sup>MesClO<sub>4</sub><sup>-</sup> (3.5 mg, 0.008mmol), **1o** (43.0 mg,

0.29mmol), Sat.NaHCO<sub>3</sub> (0.25 mL) MeCN (2.75 mL) and PPh<sub>3</sub> (ca. 1 equiv.) to afford **2o** (44.9 mg, 0.25mmol, 85% yield) as a colorless oil using PE/EA (4:1) as eluent. <sup>1</sup>H NMR (400 MHz, CDCl<sub>3</sub>) δ 7.42-7.30 (m, 4H), 7.29-7.21(m, 1H), 3.94 (d, *J* = 11.6Hz, 1H), 3.77 (dd, *J* = 10.8, 7.6 Hz, 1H), 2.78 (s, 1H), 2.08-1.94 (m, 1H), 1.87 (brs, 1H), 0.91 (d, *J* = 6.8 Hz, 3H), 0.74 (d, *J* = 7.2 Hz, 3H); <sup>13</sup>C NMR (101 MHz, CDCl<sub>3</sub>) δ 142.8, 128.1, 126.9, 126.2, 79.2, 68.2, 35.1, 17.3, 16.7.

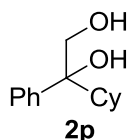

**1-cyclohexyl-1-phenylethane-1,2-diol (2p)**<sup>12</sup> Prepared according to the general procedure A employing Acr<sup>+</sup>MesClO<sub>4</sub><sup>-</sup> (3.8 mg, 0.009mmol), **1p** (54.9 mg, 0.29

mmol), Sat.NaHCO<sub>3</sub> (0.25 mL) MeCN (2.75 mL) and PPh<sub>3</sub> (ca. 1 equiv.) to afford **2p** (48.4 mg, 0.22mmol, 75% yield) as a white solid using PE/EA (5:1) as eluent. <sup>1</sup>H NMR (400 MHz, CDCl<sub>3</sub>) δ 7.43-7.31 (m, 4H), 7.30-7.23 (m, 1H), 3.99 (d, *J* = 10.8 Hz, 1H), 3.83 (dd, *J* = 10.4, 8.0 Hz, 1H), 2.72 (s, 1H), 1.88-1.54 (m, 6H), 1.43 (d, *J* = 12.4 Hz, 1H), 1.29 -0.90 (m, 5H); <sup>13</sup>C NMR (101 MHz, CDCl<sub>3</sub>) δ 143.0, 128.1, 126.9, 126.1, 79.2, 68.1, 45.5, 27.2, 26.8, 26.6, 26.4, 26.3.

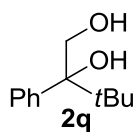

**3,3-dimethyl-2-phenylbutane-1,2-diol (2q)** Prepared according to the general procedure A employing  $\text{Acr}^+\text{MesClO}_4^-$  (3.9 mg, 0.009 mmol), **1q** (47.6 mg,

0.30mmol), Sat.NaHCO<sub>3</sub> (0.25 mL) MeCN (2.75 mL) and PPh<sub>3</sub> (ca. 1 equiv.) to afford **2q** (59.7 mg, 0.30mmol, 99% yield) as a colorless oil using PE/EA (3:1) as eluent. IR  $\nu$  3444, 2962, 2360, 1478, 1048 cm<sup>-1</sup>; <sup>1</sup>H NMR (400 MHz, CDCl<sub>3</sub>)  $\delta$  7.45 (d,  $J$  = 7.6 Hz, 2H), 7.34 (dd,  $J$  = 8.0, 7.2 Hz, 2H), 7.29-7.23 (m, 1H), 4.28 (d,  $J$  = 11.2 Hz, 1H), 3.81 (dd,  $J$  = 10.8, 9.6 Hz, 1H), 2.89 (br s, 1H), 1.54 (br s, 1H), 0.90 (s, 9H); <sup>13</sup>C NMR (101 MHz, CDCl<sub>3</sub>)  $\delta$  141.8, 127.8, 127.6, 126.9, 80.9, 65.2, 36.7, 25.8; HRMS (EI-TOF) Calcd for C<sub>12</sub>H<sub>16</sub>O [M-H<sub>2</sub>O]<sup>+</sup>:176.1201; Found 176.1200.

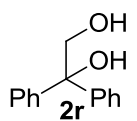

**1,1-diphenylethane-1,2-diol(2r)**<sup>13</sup> Prepared according to the general procedure A employing  $\text{Acr}^+\text{MesClO}_4^-$  (4.0 mg, 0.009 mmol), **1r** (53.5 mg, 0.30 mmol),

Sat.NaHCO<sub>3</sub> (0.25 mL) MeCN (2.75 mL) and PPh<sub>3</sub> (ca. 1 equiv.) to afford **2r** (49.1 mg, 0.23 mmol, 77% yield) as a white solid using PE/EA (3:1) as eluent. <sup>1</sup>H NMR (400 MHz, CDCl<sub>3</sub>)  $\delta$  7.47-7.40 (m, 4H), 7.38-7.30 (m, 4H), 7.30-7.23 (m, 2H), 4.15 (d,  $J$  = 6.0 Hz, 2H), 3.23 (s, 1H), 1.95 (br s, 1H); <sup>13</sup>C NMR (101 MHz, CDCl<sub>3</sub>)  $\delta$  143.8, 128.4, 127.4, 126.4, 78.5, 69.4.

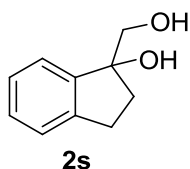

**1-(hydroxymethyl)-2,3-dihydro-1H-inden-1-ol (2s)**<sup>14</sup> Prepared according to the general procedure A employing  $\text{Acr}^+\text{MesClO}_4^-$  (3.6 mg, 0.009 mmol), **1s** (44.4 mg, 0.34mmol), Sat.KH<sub>2</sub>PO<sub>4</sub>(0.25 mL) MeCN (2.75 mL) and PPh<sub>3</sub> (ca. 1

equiv.) to afford **2s** (25.5 mg, 0.16mmol, 46% yield) as a white solid using PE/EA (3:1) as

eluent.  $^1\text{H}$  NMR (400 MHz,  $\text{CDCl}_3$ )  $\delta$  7.39 (d,  $J = 6.8$  Hz, 1H), 7.31-7.21 (m, 3H), 3.73 (d,  $J = 11.2$  Hz, 1H), 3.63 (d,  $J = 10.8$  Hz, 1H), 3.02 (ddd,  $J = 16.0, 8.8, 3.6$  Hz, 1H), 2.84 (dt,  $J = 16.0, 8.0$  Hz, 1H), 2.50 (brs, 1H), 2.48-2.39 (m, 1H), 2.25 (brs, 1H), 2.06 (dt,  $J = 13.2, 8.0$  Hz, 1H);  $^{13}\text{C}$  NMR (101 MHz,  $\text{CDCl}_3$ )  $\delta$  144.6, 143.4, 128.8, 126.8, 125.1, 123.4, 83.7, 68.1, 37.2, 29.2.

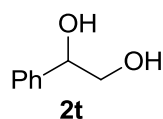

**1-phenylethane-1,2-diol (2t)**<sup>7</sup> Prepared according to the general procedure A employing  $\text{Acr}^+\text{MesClO}_4^-$  (3.9 mg, 0.009 mmol), **1t** (35.3 mg, 0.34mmol), Sat.

$\text{NaHCO}_3$  (0.25 mL) MeCN (2.75 mL) and  $\text{PPh}_3$  (ca. 1 equiv.) to afford **2t** (36.8 mg, 0.27mmol, 79% yield) as a yellow solid using PE/EA (2:1) as eluent.  $^1\text{H}$  NMR (400 MHz,  $\text{CDCl}_3$ )  $\delta$  7.37-7.26 (m, 5H), 4.82-4.74 (m, 1H), 3.77-3.67 (m, 1H), 3.67-3.56 (m, 1H), 3.42 (br s, 1H), 3.02 (br s, 1H);  $^{13}\text{C}$  NMR (101 MHz,  $\text{CDCl}_3$ )  $\delta$  140.4, 128.5, 127.9, 126.0, 74.7, 68.0.

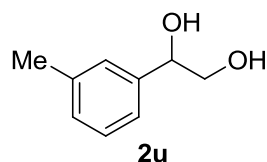

**1-(m-tolyl)ethane-1,2-diol (2u)**<sup>13</sup> Prepared according to the general procedure A employing  $\text{Acr}^+\text{MesClO}_4^-$  (3.5 mg, 0.008mmol), **1u** (35.4 mg, 0.30mmol), Sat.  $\text{NaHCO}_3$  (0.25 mL) MeCN (2.75 mL) and  $\text{PPh}_3$  (ca.

1 equiv.) to afford **2u** (31.4 mg, 0.21mmol, 69% yield) as a colorless oil using PE/EA (2:1) as eluent.  $^1\text{H}$  NMR (400 MHz,  $\text{CDCl}_3$ )  $\delta$  7.23 (dd,  $J = 15.2, 7.6$  Hz, 1H), 7.16-7.06 (m, 3H), 4.79-4.69 (m, 1H), 3.74-3.66 (m, 1H), 3.65-3.57 (m, 1H), 3.44 (br s, 1H), 3.08 (br s, 1H), 2.33 (s, 3H);  $^{13}\text{C}$  NMR (101 MHz,  $\text{CDCl}_3$ )  $\delta$  140.4, 138.1, 128.7, 128.4, 126.7, 123.1, 74.7, 68.0, 21.4.

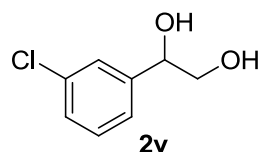

**1-(3-chlorophenyl)ethane-1,2-diol (2v)**<sup>15</sup> Prepared according to the general procedure A employing  $\text{Acr}^+\text{MesClO}_4^-$  (4.0 mg, 0.009mmol),

**1v**(42.0 mg, 0.30mmol), Sat. NaHCO<sub>3</sub> (0.25 mL), MeCN (2.75 mL) and PPh<sub>3</sub> (ca. 1 equiv.) to afford **2v** (25.1 mg, 0.15mmol, 48% yield) as a yellow oli using PE/EA (2:1) as eluent.<sup>1</sup>H NMR (400 MHz, CDCl<sub>3</sub>) δ 7.36 (s, 1H), 7.32-7.17 (m, 3H), 4.84-4.70 (m, 1H), 3.81-3.67 (m, 1H), 3.66-3.54 (m, 1H), 3.25 (br s, 1H), 2.62 (br s, 1H); <sup>13</sup>C NMR (101 MHz, CDCl<sub>3</sub>) δ 142.5, 134.5, 129.8, 128.1, 126.2, 124.2, 74.0, 67.8.

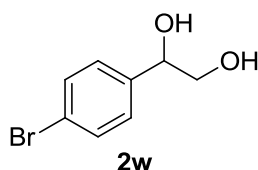

**1-(4-bromophenyl)ethane-1,2-diol (2w)**<sup>7</sup> Prepared according to the general procedure A employing Acr<sup>+</sup>MesClO<sub>4</sub><sup>-</sup> (3.7 mg, 0.009mmol), **1w** (54.5 mg, 0.30mmol), Sat. NaHCO<sub>3</sub> (0.25 mL), MeCN (2.75 mL). and

PPh<sub>3</sub> (ca. 1 equiv.) to afford **2w** (33.8 mg, 0.16 mmol, 52% yield) as a white solid using PE/EA (2:1) as eluent.<sup>1</sup>H NMR (400 MHz, CDCl<sub>3</sub>) δ 7.49 (d, *J* = 8.4 Hz, 2H), 7.29-7.21 (m, 2H), 4.83-4.71 (m, 1H), 3.81-3.67 (m, 1H), 3.67-3.55 (m, 1H), 2.72 (s, 1H), 2.19 (s, 1H); <sup>13</sup>C NMR (101 MHz, CDCl<sub>3</sub>) δ 139.4, 131.6, 127.8, 121.8, 74.0, 67.9.

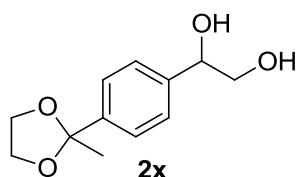

**1-(4-(2-methyl-1,3-dioxolan-2-yl)phenyl)ethane-1,2-diol**

**(2x)** Prepared according to the general procedure A employing Acr<sup>+</sup>MesClO<sub>4</sub><sup>-</sup> (3.9 mg, 0.009mmol), **1x** (60.2 mg, 0.32mmol), Sat.

NaHCO<sub>3</sub> (0.25 mL), MeCN (2.75 mL) and PPh<sub>3</sub> (ca. 1 equiv.) to afford **2x** (51.9 mg, 0.23 mmol, 73% yield) as a white solid using PE/EA (3:2) as eluent. IR ν 3318, 2926, 1730, 1251, 1193, 1079, 1037 cm<sup>-1</sup>; <sup>1</sup>H NMR (400 MHz, CDCl<sub>3</sub>) δ 7.47 (d, *J* = 8.4 Hz, 2H), 7.34 (d, *J* = 8.4 Hz, 2H), 4.84-4.78 (m, 1H), 4.09-3.97 (m, 1H), 3.82-3.71 (m, 3H), 3.70-3.60 (m, 1H), 2.82 (br s, 1H), 2.38

(s, 1H), 1.64 (s, 3H);  $^{13}\text{C}$  NMR (101 MHz,  $\text{CDCl}_3$ )  $\delta$  143.1, 140.1, 126.0, 125.5, 108.7, 74.4, 68.0, 64.4, 27.5; HRMS (EI-TOF) Calcd for  $\text{C}_{11}\text{H}_{11}\text{O}_3$   $[\text{M}-\text{H}_2\text{O}-\text{CH}_3]^+$ :191.0708; Found 191.0709.

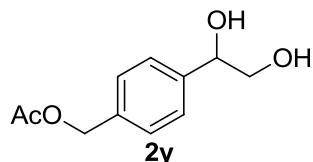

**4-(1,2-dihydroxyethyl)benzyl acetate (2y)**. Prepared according to the general procedure A employing  $\text{Acr}^+\text{MesClO}_4^-$  (3.9 mg, 0.009mmol), **1y** (51.1mg, 0.29mmol), Sat.  $\text{NaHCO}_3$  (0.25 mL), MeCN (2.75 mL) and  $\text{PPh}_3$  (ca. 1 equiv.) to afford **2y** (38.6 mg, 0.18mmol, 63% yield) as a colorless oil using PE/EA (1:1) as eluent. IR  $\nu$  3405, 2925, 1736, 1379, 1235, 1078, 1031  $\text{cm}^{-1}$ ;  $^1\text{H}$  NMR (400 MHz,  $\text{CDCl}_3$ )  $\delta$  7.40-7.30 (m, 4H), 5.09 (s, 2H), 4.85-4.76 (m, 1H), 3.80-3.69 (m, 1H), 3.68-3.58 (m, 1H), 2.89 (br s, 1H), 2.42 (br s, 1H), 2.09 (s, 3H);  $^{13}\text{C}$  NMR (101 MHz,  $\text{CDCl}_3$ )  $\delta$  171.0, 140.6, 135.6, 128.4, 126.3, 74.3, 68.0, 66.0, 21.0; HRMS (EI-TOF) Calcd for  $\text{C}_{11}\text{H}_{12}\text{O}_3$   $[\text{M}-\text{H}_2\text{O}]^+$ :192.0786; Found 192.0786.

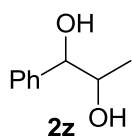

**1-phenylpropane-1,2-diol (2z)** Prepared according to the general procedure A employing  $\text{Acr}^+\text{MesClO}_4^-$  (4.0 mg, 0.009mmol), **1z** (35.7 mg, 0.30mmol), Sat.  $\text{NaHCO}_3$  (0.25 mL), MeCN (2.75 mL) and  $\text{PPh}_3$  (ca. 1 equiv.) to afford **2z** (30.5 mg, 0.20 mmol, 66% yield, *dr* 1.9/1) as a colorless oil using PE/EA (3:2) as eluent.  $^1\text{H}$  NMR (400 MHz,  $\text{CDCl}_3$ )  $\delta$  7.39-7.27 (m, 5H), 4.69-4.63 (m, 0.55 H), 4.36 (dd,  $J = 7.2, 1.6$  Hz, 0.43 H), 4.05-3.90 (m, 0.55H), 3.89-3.80 (m, 0.44H), 2.83 (br s, 0.41H), 2.66 (br, s 0.41H), 2.58 (br s, 0.53H), 2.05 (br s, 0.52 H), 1.08 (d,  $J = 6.4$  Hz, 1.64 H), 1.05 (d,  $J = 6.4$  Hz, 1.33 H).



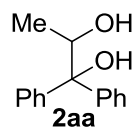

**1,1-diphenylpropane-1,2-diol (2aa)**<sup>16</sup> Prepared according to the general procedure

A employing  $\text{Acr}^+\text{MesClO}_4^-$  (3.9 mg, 0.009 mmol), **1aa** (60.9 mg, 0.31 mmol), Sat.  $\text{NaHCO}_3$  (0.25 mL), MeCN (2.75 mL) and  $\text{PPh}_3$  (ca. 1 equiv.) to afford **2aa** (43.3 mg, 0.19 mmol, 61% yield) as a white solid using PE/EA (5:1) as eluent.  $^1\text{H}$  NMR (400 MHz,  $\text{CDCl}_3$ )  $\delta$  7.59 (d,  $J = 7.2$  Hz, 2H), 7.42 (d,  $J = 7.2$  Hz, 2H), 7.38-7.22 (m, 5H), 7.22-7.14 (m, 1H), 4.86-4.73 (m, 1H), 3.05 (d,  $J = 1.2$  Hz, 1H), 1.94 (s, 1H), 1.09 (d,  $J = 6.0$  Hz, 3H);  $^{13}\text{C}$  NMR (101 MHz,  $\text{CDCl}_3$ )  $\delta$  145.6, 143.8, 128.6, 128.1, 127.2, 126.7, 126.2, 125.5, 79.8, 71.6, 16.6.

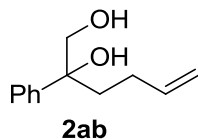

**2-phenylhex-5-ene-1,2-diol (2ab)**. Prepared according to the general

procedure A employing  $\text{Acr}^+\text{MesClO}_4^-$  (4.0 mg, 0.009 mmol), **1ab** (43.6 mg, 0.27 mmol), Sat.  $\text{NaHCO}_3$  (0.25 mL), MeCN (2.75 mL) and  $\text{PPh}_3$  (ca. 1 equiv.) to afford **2ab** (24.6 mg, 0.13 mmol, 46% yield) as a colorless oil using PE/EA (3:1) as eluent. IR  $\nu$  3409, 2930, 1736, 1379, 1235, 1078, 1031  $\text{cm}^{-1}$ ;  $^1\text{H}$  NMR (400 MHz,  $\text{CDCl}_3$ )  $\delta$  7.44-7.33 (m, 4H), 7.30-7.24 (m, 1H), 5.83-5.70 (m, 1H), 4.99-4.88 (m, 1H), 3.81 (d,  $J = 11.2$  Hz, 1H), 3.68 (d,  $J = 11.2$  Hz, 1H), 2.83 (brs, 1H), 2.13-2.02 (m, 1H), 2.02-1.76 (m, 4H);  $^{13}\text{C}$  NMR (101 MHz,  $\text{CDCl}_3$ )  $\delta$  143.1, 138.6, 128.4, 127.1, 125.5, 114.6, 77.2, 70.6, 37.4, 27.5; HRMS (EI-TOF) Calcd for  $\text{C}_{12}\text{H}_{16}\text{O}_2$   $[\text{M}+\text{H}]^+$ :193.1229; Found 193.1220.

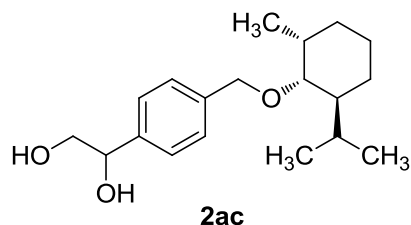

**1-(4-(((1R,2S,6R)-2-isopropyl-6-methylcyclohexyl)oxy)**

**methyl)phenyl)ethane-1,2-diol (2ac)** Prepared according to

the general procedure A employing  $\text{Acr}^+\text{MesClO}_4^-$  (4.0 mg, 0.009 mmol), **1ac** (79.5 mg, 0.29 mmol), Sat.  $\text{NaHCO}_3$  (0.25 mL), MeCN (2.75 mL) and  $\text{PPh}_3$  (ca. 1 equiv.) to afford **2ac** (45.6 mg, 0.15 mmol, 51% yield) as a colorless oil using PE/EA (2:1) as

eluent. IR  $\nu$  3389, 2952, 2923, 2867, 1456, 1077  $\text{cm}^{-1}$ ;  $^1\text{H}$  NMR (400 MHz,  $\text{CDCl}_3$ )  $\delta$  7.38-7.28 (m, 4H), 4.77 (d,  $J = 6.0$  Hz, 1H), 4.64 (d,  $J = 11.6$  Hz, 1H), 4.38 (d,  $J = 11.2$  Hz, 1H), 3.69 (d,  $J = 10.4$  Hz, 1H), 3.64-3.53 (m, 1H), 3.17 (td,  $J = 10.8, 4.0$  Hz, 1H), 2.85 (br s, 1H), 2.43 (br s, 1H), 2.33-2.23 (m, 1H), 2.18 (d,  $J = 12.0$  Hz, 1H), 1.71-1.56 (m, 1H), 1.45-1.21 (m, 2H), 1.04-0.79 (m, 8H), 0.71 (d,  $J = 6.8$ z, 3H);  $^{13}\text{C}$  NMR (101 MHz,  $\text{CDCl}_3$ )  $\delta$  139.7, 138.8, 128.1, 126.0, 78.9, 74.4, 70.1, 68.0, 48.2, 40.3, 34.5, 31.5, 25.5, 23.2, 22.3, 21.0, 16.0; HRMS (EI-TOF) Calcd for  $\text{C}_{18}\text{H}_{27}\text{O}_2$   $[\text{M}-\text{CH}_2\text{OH}]^+$ : 275.2011; Found 275.2012.

### III. Transformations of vicinal alcohols

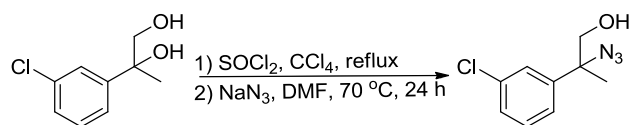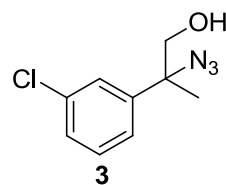

**2-azido-2-(3-chlorophenyl)propan-1-ol (3).** To a 50 mL overdried flask

was added **2f** (57.5 mg, 0.31 mmol),  $\text{CCl}_4$  (1.5 mL) and  $\text{SOCl}_2$  (161  $\mu\text{L}$ )

under  $\text{N}_2$  atmosphere. The mixture was refluxed for 1 h. After cooled to

room temperature, the mixture was washed by saturated  $\text{NaHCO}_3$  and brine. The organic phase

was dried and concentrated under reduced pressure to give the crude cyclic sulfite, which was

transferred to a flask containing  $\text{NaN}_3$  (50.0 mg, 0.77 mmol) and DMF (2 mL). The reaction was

refluxed overnight. After being cooled to room temperature, the reaction was quenched by diluted

$\text{H}_2\text{SO}_4$ ,  $\text{H}_2\text{O}$  and saturated  $\text{NaHCO}_3$ . The combined organic layers was dried over anhydrous

$\text{Na}_2\text{SO}_4$ , concentrated under reduced pressure and purified by column chromatography using

PE/EA (10:1) as eluent to afford **3** (38.8 mg, 0.18 mmol, 61% yield) as a colorless oil. IR  $\nu$  3378,

2928, 2108, 1472, 1260, 1049  $\text{cm}^{-1}$ ;  $^1\text{H}$  NMR (400 MHz,  $\text{CDCl}_3$ )  $\delta$  7.48 (s, 1H), 7.42-7.32 (m, 3H),

3.74 (dd,  $J = 11.6, 6.0$  Hz, 1H), 3.67 (dd,  $J = 11.2, 7.6$  Hz, 1H), 2.01 (br s, 1H), 1.77 (s, 3H);  $^{13}\text{C}$

NMR (101 MHz, CDCl<sub>3</sub>)  $\delta$  143.0, 134.7, 130.0, 128.1, 126.4, 124.2, 70.4, 67.3, 21.3; HRMS (ESI-TOF) Calcd for C<sub>9</sub>H<sub>11</sub>ClN<sub>3</sub>O [M+H]<sup>+</sup>:212.0591; Found 212.0593.

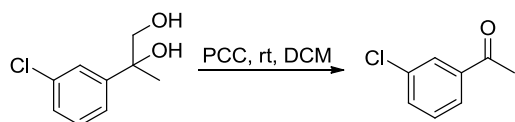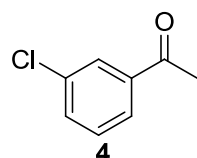

**1-(3-chlorophenyl)ethanone (4)**<sup>17</sup>To a 50 mL flask was added **2f** (59.5 mg, 0.32 mmol), PCC (129.3 mg, 0.6 mmol) and DCM (10 mL). The mixture was stirred overnight at room temperature. The reaction mixture was diluted with

Et<sub>2</sub>O, filtered through a short pad of silica gel, concentrated under reduced pressure and purified through column chromatography using PE/EA (20:1) to afford **4** (24.5 mg, 0.16 mmol, 51% yield) as a colorless oil. <sup>1</sup>H NMR (400 MHz, CDCl<sub>3</sub>)  $\delta$  7.93 (s, 1H), 7.83 (d, *J* = 7.6 Hz, 1H), 7.54 (d, *J* = 7.6 Hz, 1H), 7.41 (dd, *J* = 15.6, 7.6 Hz, 1H), 2.60 (s, 3H).

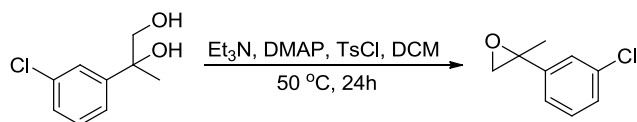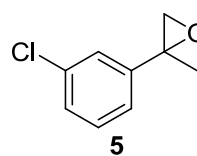

**2-(3-chlorophenyl)-2-methyloxirane (5)**.<sup>18</sup>To a 50 mL over-dried flask, cooled under N<sub>2</sub> atmosphere, was added **2f** (58.8 mg, 0.31 mmol), DCM (4 mL) and NEt<sub>3</sub> (0.46 mL, 3.4 mmol). The mixture was cooled to 0 °C and then

TsCl (70.2 mg, 0.37 mmol) and DMAP (4.9 mg, 0.04 mmol). The reaction was warmed to 50 °C and stirred for 24 h. After being cooled to room temperature, H<sub>2</sub>O (3 mL) was added to quench the reaction. The mixture was extracted by DCM. The combined organic layers were dried over anhydrous MgSO<sub>4</sub>, filtered, concentrated and purified by column chromatography to afford **5** (32.5 mg, 0.19 mmol, 61% yield) as a colorless oil using PE/EA (50:1) as eluent. <sup>1</sup>H NMR (400

MHz, CDCl<sub>3</sub>)  $\delta$  7.35 (s, 1H), 7.30-7.22 (m, 3H), 2.97 (d,  $J$  = 5.6 Hz, 1H), 2.77 (d,  $J$  = 5.6 Hz, 1H), 1.71 (s, 3H); <sup>13</sup>C NMR (101 MHz, CDCl<sub>3</sub>)  $\delta$  143.4, 134.4, 129.6, 127.6, 125.6, 123.5, 57.0, 56.3, 21.6.

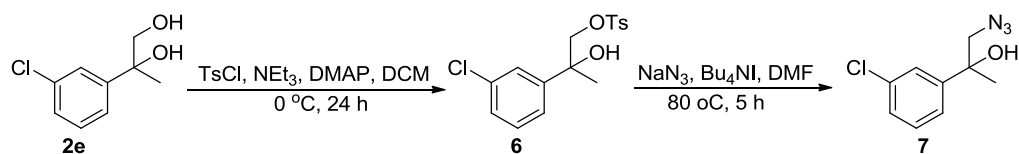

To a 50 mL over-dried flask, cooled under N<sub>2</sub> atmosphere, were added **2f** (55.8 mg, 0.30 mmol), DCM (3.5 mL) and NEt<sub>3</sub> (48  $\mu$ L, 0.36 mmol). The mixture was cooled to 0 °C, TsCl (69.0 mg, 0.36 mmol) and DMAP (6.1 mg, 0.05 mmol) were added. Then the reaction was stirred overnight at 0 °C. H<sub>2</sub>O was added to quench the the reaction and extracted with DCM. The combined organic layers were dried over anhydrous Na<sub>2</sub>SO<sub>4</sub>, filtered, concentrated and purified by column chromatography to afford **6** (72.5 mg, 0.21 mmol, 71% yield) as a colorless oil using PE/EA (5:1) as eluents. IR  $\nu$  3524, 2985, 1597, 1360, 1179 cm<sup>-1</sup>; <sup>1</sup>H NMR (400 MHz, CDCl<sub>3</sub>)  $\delta$  7.68 (d,  $J$  = 8.0 Hz, 2H), 7.30 (d,  $J$  = 8.4 Hz, 3H), 7.23 (s, 3H), 4.07 (d,  $J$  = 10.0 Hz, 1H), 4.05 (d,  $J$  = 10.4 Hz, 1H), 2.72 (s, 1H), 2.44 (s, 3H), 1.52 (s, 3H); <sup>13</sup>C NMR (101 MHz, CDCl<sub>3</sub>)  $\delta$  145.1, 134.3, 132.1, 129.9, 129.6, 127.8, 127.7, 125.4, 123.2, 76.3, 72.9, 26.0, 21.6; HRMS (ESI-TOF) Calcd for C<sub>16</sub>H<sub>18</sub>ClO<sub>4</sub>S [M+H]<sup>+</sup>:341.0614; Found 341.0616.

To a 50 mL over-dried flask, cooled under N<sub>2</sub> atmosphere, were added **6** (71.2 mg, 0.21 mmol), DMF (2 mL), NaN<sub>3</sub> (48.2 mg, 0.74 mmol) and Bu<sub>4</sub>NI (12.1 mg, 0.033 mmol). The mixture was heated to 80 °C and stirred overnight. After cooled to room temperature, H<sub>2</sub>O was added and extracted with Et<sub>2</sub>O. The combined organic layers were washed by H<sub>2</sub>O and dried by anhydrous Na<sub>2</sub>SO<sub>4</sub>. After being filtered, concentrated, the reaction mixture was purified by column chromatography to afford **7** (39.8 mg, 0.19 mmol, 90% yield) as a colorless oil using PE/EA (20:1)

as eluents. IR  $\nu$  3449, 2105, 1573, 1295  $\text{cm}^{-1}$ ;  $^1\text{H}$  NMR (400 MHz,  $\text{CDCl}_3$ )  $\delta$  7.47 (s, 1H), 7.34-7.23 (m, 3H), 3.58 (d,  $J = 12.4$  Hz, 1H), 3.44 (d,  $J = 12.4$  Hz, 1H), 2.38 (s, 1H), 1.57 (s, 3H);  $^{13}\text{C}$  NMR (101 MHz,  $\text{CDCl}_3$ )  $\delta$  146.8, 134.5, 129.7, 127.6, 125.4, 123.1, 74.3, 61.9, 27.1; HRMS (ESI-TOF) Calcd for  $\text{C}_9\text{H}_{11}\text{ClN}_3\text{O}$   $[\text{M}+\text{H}]^+$ :212.0591; Found 212.0590.

#### IV. Mechanistic studies

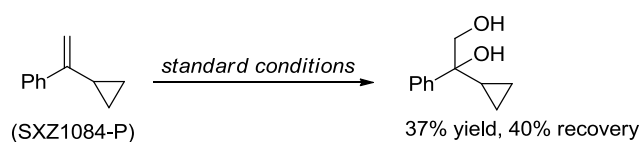

**1-cyclopropyl-1-phenylethane-1,2-diol (9)** To a 50 mL flask,  $\text{Acr}^+\text{MesClO}_4^-$  (3.9 mg, 0.009 mmol), **8** (43.1 mg, 0.30mmol), Sat.  $\text{NaHCO}_3$  (0.25 mL) and MeCN (2.75 mL) were added sequentially under air. The reaction mixture was irradiated by 8W blue LEDs at a distance of 10 cm for 6 h. To the flask,  $\text{PPh}_3$  (1 equiv.) was added and stirred for 30 min at room temperature. The reaction mixture was then diluted with  $\text{Et}_2\text{O}$  and filtered through a short pad of silica using  $\text{Et}_2\text{O}$  and EA. The filtrate was concentrated *in vacuo* and purified by flash chromatography on silica gel to afford **9** (19.7 mg, 0.11 mmol, 37% yield) as a colorless oil.  $^1\text{H}$  NMR (400 MHz,  $\text{CDCl}_3$ )  $\delta$  7.47 (d,  $J = 7.2$  Hz, 2H), 7.36 (dd,  $J = 8.4, 7.2$  Hz, 2H), 7.31-7.24 (m, 1H), 3.94 (dd,  $J = 11.6, 5.2$  Hz, 1H), 3.78 (dd,  $J = 11.2, 6.8$  Hz, 1H), 2.54 (s, 1H), 1.86 (br s, 1H), 1.14-1.12 (m, 1H), 0.55-.42 (m, 2H), 0.40-0.25 (m, 2H);  $^{13}\text{C}$  NMR (101 MHz,  $\text{CDCl}_3$ )  $\delta$  143.6, 128.2, 127.2, 125.7, 75.1, 70.5, 18.3, 0.8, -0.2

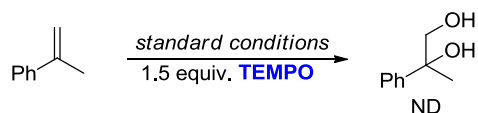

To a 50 mL flask,  $\text{Acr}^+\text{MesClO}_4^-$  (3.9 mg, 0.009 mmol), **1** (34.9 mg, 0.30 mmol), TEMPO (70.8 mg, 0.45 mmol), Sat.  $\text{NaHCO}_3$  (0.25 mL) and MeCN (2.75 mL) were added sequentially under air. The reaction mixture was irradiated by 8W blue LEDs at a distance of 10 cm for 6 h. To the flask,  $\text{PPh}_3$  (1 equiv.) was added and stirred for 30 min at room temperature. The reaction mixture was then diluted with  $\text{Et}_2\text{O}$  and filtered through a short pad of silica using  $\text{Et}_2\text{O}$  and EA. The filtrate was concentrated *in vacuo* and monitored by  $^1\text{H}$  NMR spectroscopy. The results demonstrated that

No **2a** was obtained.

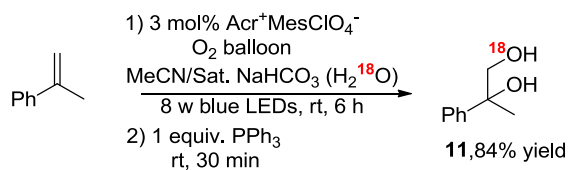

To a 50 mL over-dried flask,  $\text{Acr}^+\text{MesClO}_4^-$  (3.7 mg, 0.009 mmol), **1** (34.9 mg, 0.3 mmol), Sat.  $\text{NaHCO}_3$  (0.25 mL,  $\text{H}_2^{18}\text{O}$ ) and MeCN (2.75 mL) were added sequentially under air. The reaction mixture was irradiated by 8W blue LEDs at a distance of 10 cm for 6 h. To the flask,  $\text{PPh}_3$  (1 equiv.) was added and stirred for 30 min at room temperature. The reaction mixture was then diluted with  $\text{Et}_2\text{O}$  and filtered through a short pad of silica using  $\text{Et}_2\text{O}$  and EA. The filtrate was concentrated *in vacuo* and purified by flash chromatography on silica gel to afford **11** (38.2 mg, 0.25 mmol, 84% yield) as a colorless oil. HRMS (ESI-TOF) Calcd for  $\text{C}_9\text{H}_{12}\text{O}_2$   $[\text{M}+\text{Na}]^+$ : 177.0777; Found 177.0772.

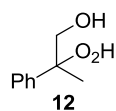

**2-hydroperoxy-2-phenylpropan-1-ol (12)**.<sup>19</sup> Prepared according to the general A

procedure employing  $\text{Acr}^+\text{MesClO}_4^-$  (3.9 mg, 0.009 mmol), **1a** (36.7 mg, 0.31 mmol), Sat.  $\text{NaHCO}_3$  (0.25 mL) and MeCN (2.75 mL). After 6h, the reaction mixture was then diluted with  $\text{Et}_2\text{O}$  and filtered through a short pad of silica using  $\text{Et}_2\text{O}$  and EA. The filtrate was concentrated *in vacuo* and purified by flash chromatography on silica gel to afford **12** (42.7 mg, 0.25 mmol, 82% yield) as a colourless oil using PE/EA (2:1) as eluent.  $^1\text{H}$  NMR (400 MHz,  $\text{CDCl}_3$ )  $\delta$  8.53 (br s, 1H), 7.47-7.27 (m, 5H), 4.03 (d,  $J = 12.0$  Hz, 1H), 3.88 (d,  $J = 12.0$  Hz, 1H), 2.61 (br s, 1H), 1.56 (s, 3H);  $^{13}\text{C}$  NMR (101 MHz,  $\text{CDCl}_3$ )  $\delta$  141.2, 128.6, 127.8, 125.6, 86.2, 66.7, 21.7.

## V. General Procedures B for Dioxylation of styrenes

To a 50 mL flask,  $\text{Acr}^+\text{MesClO}_4^-$  (0.015 mmol), **1** (0.3 mmol), alcohol (0.5 mL) and MeCN (5.5 mL) were added sequentially under  $\text{O}_2$  balloon. The reaction mixture was irradiated by 8W blue LEDs at a distance of 10 cm for 3 h. The reaction mixture was reduced by  $\text{PPh}_3$  (0.3 mmol) stirred for 30 min at room temperature before it was purified by flash chromatography on silica gel to afford **13**.

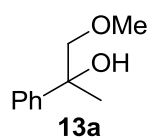

**1-methoxy-2-phenylpropan-2-ol (13a)**<sup>20</sup>. Prepared according to the general procedure B employing **1a** (35.8 mg, 0.30 mmol),  $\text{Acr}^+\text{MesClO}_4^-$  (6.0 mg, 0.015 mmol), 4Å MS (70.7 mg), MeCN (5.5 mL) and MeOH (0.5 mL). After 3 h,  $\text{PPh}_3$  (78.1 mg, 0.30 mmol) was added and stirred at rt for 30 min. The reaction mixture was diluted with  $\text{Et}_2\text{O}$  and passed through a short pad of silica gel. The filtrate was condensed and purified by flash column chromatography using PE/EA (10:1) as an eluent to afford **13a** (31.7 mg, 0.19 mmol, 63% yield) as a colorless oil.  $^1\text{H}$  NMR (400 MHz,  $\text{CDCl}_3$ )  $\delta$  7.47 (d,  $J = 8.0$  Hz, 2H), 7.35 (dd,  $J = 7.6, 7.6$  Hz, 2H), 7.28-7.23 (m, 1H), 3.59 (d,  $J = 9.2$  Hz, 1H), 3.48 (d,  $J = 9.2$  Hz, 1H), 3.37 (s, 3H), 2.93 (s,

1H), 1.51 (s, 3H); <sup>13</sup>C NMR (101 MHz, CDCl<sub>3</sub>) δ 145.4, 128.1, 126.9, 124.9, 80.7, 73.8, 59.3, 26.7.

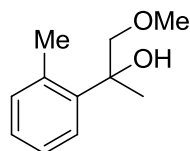

**13b**

**1-methoxy-2-(o-tolyl)propan-2-ol (13b).** Prepared according to the general procedure B employing the 1-methyl-2-(prop-1-en-2-yl)benzene **13bs** (38.6 mg, 0.29 mmol), Acr<sup>+</sup>MesClO<sub>4</sub><sup>-</sup> (6.4 mg, 0.015 mmol), 4Å MS (80.7 mg), MeCN (5.5 mL) and MeOH (0.5 mL). After 3 h, PPh<sub>3</sub> (77.9 mg, 0.30 mmol) was added and stirred at rt for 30 min. The reaction mixture was diluted with Et<sub>2</sub>O and passed through a short pad of silica gel. The filtrate was condensed and purified by flash column chromatography using PE/EA (10:1) as an eluent to afford **13b** (24.9 mg, 0.14 mmol, 47% yield) as a yellow oil. IR ν 3460, 2928, 1455, 1108 cm<sup>-1</sup>; <sup>1</sup>H NMR (400 MHz, CDCl<sub>3</sub>) δ 7.44-7.38 (m, 1H), 7.21-7.12 (m, 3H), 3.84 (d, *J* = 9.2 Hz, 1H), 3.51 (d, *J* = 9.2 Hz, 1H), 3.42 (s, 3H), 2.92 (s, 1H), 2.56 (s, 3H), 1.56 (s, 3H); <sup>13</sup>C NMR (101 MHz, CDCl<sub>3</sub>) δ 142.3, 136.0, 132.6, 127.2, 126.1, 125.6, 79.3, 74.9, 59.3, 25.8, 22.3; HRMS (EI-TOF) Calcd for C<sub>11</sub>H<sub>16</sub>O<sub>2</sub> [M]<sup>+</sup>:180.1150; Found 180.1145.

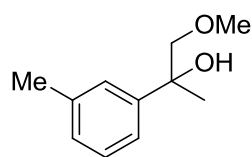

**13c**

**1-methoxy-2-(m-tolyl)propan-2-ol (13c).** Prepared according to the general procedure B employing **1b** (38.7 mg, 0.29 mmol), Acr<sup>+</sup>MesClO<sub>4</sub><sup>-</sup> (6.4 mg, 0.015 mmol), 4Å MS (75.1 mg), MeCN (5.5 mL) and MeOH (0.5 mL). After 3 h, PPh<sub>3</sub> (80.6 mg, 0.30 mmol) was added and stirred at rt for 30 min. The reaction mixture was diluted with Et<sub>2</sub>O and passed through a short pad of silica gel. The filtrate was condensed and purified by flash column chromatography using PE/EA (10:1) as an eluent to afford **13c** (39.7 mg, 0.22 mmol, 75% yield) as a colorless oil. IR ν 3459, 2926, 1455, 1107 cm<sup>-1</sup>; <sup>1</sup>H NMR (400 MHz, CDCl<sub>3</sub>) δ 7.30 (s, 1H), 7.24 (d, *J* = 4.8 Hz, 2H), 7.10-7.04 (m, 1H), 3.58 (d,



$J = 9.2$  Hz, 1H), 3.47 (d,  $J = 9.2$  Hz, 1H), 3.38 (s, 3H), 2.89 (s, 1H), 2.36 (s, 3H), 1.50 (s, 3H);  $^{13}\text{C}$  NMR (101 MHz,  $\text{CDCl}_3$ )  $\delta$  145.3, 137.7, 128.1, 127.7, 125.6, 121.9, 80.7, 73.8, 59.4, 26.7, 21.6; HRMS (EI-TOF) Calcd for  $\text{C}_{11}\text{H}_{16}\text{O}_2$   $[\text{M}]^+$ :180.1150; Found 180.1150.

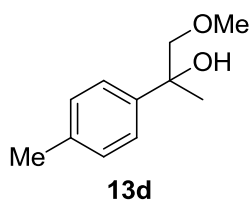

**1-methoxy-2-(p-tolyl)propan-2-ol (13d).** Prepared according to the general procedure B employing 1-methyl-4-(prop-1-en-2-yl)benzene **13ds** (40.4 mg, 0.30 mmol),  $\text{Acr}^+\text{MesClO}_4^-$  (6.4 mg, 0.015 mmol),  $4\text{\AA}$  MS (76.4 mg), MeCN (5.5 mL) and MeOH (0.5 mL). After 3 h,  $\text{PPh}_3$  (77.2 mg, 0.30 mmol) was added and stirred at rt for 30 min. The reaction mixture was diluted with  $\text{Et}_2\text{O}$  and passed through a short pad of silica gel. The filtrate was condensed and purified by flash column chromatography using PE/EA (10:1) as an eluent to afford **13d** (33.1 mg, 0.18 mmol, 60% yield) as a colorless oil. IR  $\nu$  3463, 2926, 1453, 1106  $\text{cm}^{-1}$ ;  $^1\text{H}$  NMR (400 MHz,  $\text{CDCl}_3$ )  $\delta$  7.35 (d,  $J = 8.0$  Hz, 2H), 7.16 (d,  $J = 8.0$  Hz, 2H), 3.58 (d,  $J = 9.2$  Hz, 1H), 3.46 (d,  $J = 9.2$  Hz, 1H), 3.37 (s, 3H), 2.87 (s, 1H), 2.33 (s, 3H), 1.49 (s, 3H);  $^{13}\text{C}$  NMR (101 MHz,  $\text{CDCl}_3$ )  $\delta$  142.4, 136.4, 128.8, 124.8, 80.7, 73.7, 59.3, 26.7, 21.0; HRMS (EI-TOF) Calcd for  $\text{C}_{11}\text{H}_{16}\text{O}_2$   $[\text{M}]^+$ :180.1150; Found 180.1154.

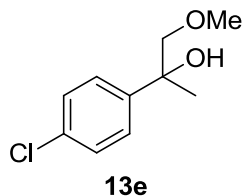

**2-(4-chlorophenyl)-1-methoxypropan-2-ol (13e).** Prepared according to the general procedure B employing **1d** (46.8 mg, 0.31 mmol),  $\text{Acr}^+\text{MesClO}_4^-$  (6.5 mg, 0.015 mmol),  $4\text{\AA}$  MS (90.9 mg), MeCN (5.5 mL) and MeOH (0.5 mL). After 3 h,  $\text{PPh}_3$  (80.1 mg, 0.31 mmol) was added and stirred at rt for 30 min. The reaction mixture was diluted with  $\text{Et}_2\text{O}$  and passed through a short pad of silica gel. The filtrate was condensed and purified by flash column chromatography using PE/EA (10:1) as an

eluent to afford **13e** (47.0 mg, 0.23 mmol, 76% yield) as a colorless oil. IR  $\nu$  3445, 2930, 1491, 1093  $\text{cm}^{-1}$ ;  $^1\text{H}$  NMR (400 MHz,  $\text{CDCl}_3$ )  $\delta$  7.39 (d,  $J = 8.8$  Hz, 2H), 7.30 (d,  $J = 8.8$  Hz, 2H), 3.54 (d,  $J = 9.2$  Hz, 1H), 3.45 (d,  $J = 9.2$  Hz, 1H), 3.37 (s, 3H), 2.91 (s, 1H), 1.48 (s, 3H);  $^{13}\text{C}$  NMR (101 MHz,  $\text{CDCl}_3$ )  $\delta$  144.0, 132.7, 128.2, 126.5, 80.5, 73.5, 59.4, 26.6; HRMS (EI-TOF) Calcd for  $\text{C}_{10}\text{H}_{13}\text{O}_2\text{Cl}$   $[\text{M}]^+$ :200.0604; Found 200.0606.

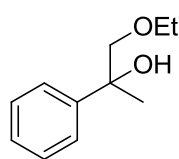

**13f**

**1-ethoxy-2-phenylpropan-2-ol (13f)**<sup>20</sup>. Prepared according to the general procedure B employing **1a** (35.7 mg, 0.30 mmol),  $\text{Acr}^+\text{MesClO}_4^-$  (6.3 mg, 0.015 mmol), 4Å MS (70.8 mg), MeCN (5.5 mL) and MeOH (0.5 mL). After 3 h,

$\text{PPh}_3$  (79.3 mg, 0.30 mmol) was added and stirred at rt for 30 min. The reaction mixture was diluted with  $\text{Et}_2\text{O}$  and passed through a short pad of silica gel. The filtrate was condensed and purified by flash column chromatography using PE/EA (30:1) as an eluent to afford **13f** (34.5 mg, 0.19 mmol, 63% yield) as a colorless oil.  $^1\text{H}$  NMR (400 MHz,  $\text{CDCl}_3$ )  $\delta$  7.47 (d,  $J = 8.0$  Hz, 2H), 7.34 (dd,  $J = 7.6, 7.2$  Hz, 2H), 7.25 (t,  $J = 6.4$  Hz, 1H), 3.60-3.474 (m, 4H), 2.93 (s, 1H), 1.52 (s, 3H), 1.17 (t,  $J = 6.8$  Hz, 3H);  $^{13}\text{C}$  NMR (101 MHz,  $\text{CDCl}_3$ )  $\delta$  145.6, 128.1, 126.8, 125.0, 78.4, 73.7, 67.0, 26.7, 15.0.

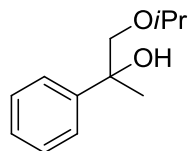

**13g**

**1-isopropoxy-2-phenylpropan-2-ol (13g)**. Prepared according to the general procedure B employing **1a** (36.7 mg, 0.31 mmol),  $\text{Acr}^+\text{MesClO}_4^-$  (5.8 mg, 0.014 mmol), 4Å MS (70.8 mg), MeCN (5.5 mL) and MeOH (0.5 mL). After 3

h,  $\text{PPh}_3$  (80.0 mg, 0.30 mmol) was added and stirred at rt for 30 min. The reaction mixture was diluted with  $\text{Et}_2\text{O}$  and passed through a short pad of silica gel. The filtrate was condensed and purified by flash column chromatography using PE/EA (30:1) as an eluent to afford **13g** (30.6 mg,

0.16 mmol, 51% yield) as a colorless oil. IR  $\nu$  3455, 2974, 1449, 1372, 1127, 1085  $\text{cm}^{-1}$ ;  $^1\text{H}$  NMR (400 MHz,  $\text{CDCl}_3$ )  $\delta$  7.47 (d,  $J = 7.6$  Hz, 2H), 7.34 (dd,  $J = 7.6, 7.2$  Hz, 2H), 7.24 (t,  $J = 7.2$  Hz, 1H), 3.62-3.56 (m, 1H), 3.54 (d,  $J = 8.8$  Hz, 1H), 3.49 (d,  $J = 9.2$  Hz, 1H), 2.98 (s, 1H), 1.52 (s, 3H), 1.15 (dd,  $J = 6.4$  Hz, 3H), 1.12 (dd,  $J = 6.0$  Hz, 3H);  $^{13}\text{C}$  NMR (101 MHz,  $\text{CDCl}_3$ )  $\delta$  145.7, 128.0, 126.8, 125.0, 76.2, 73.6, 72.5, 26.7, 22.00, 21.97; HRMS (EI-TOF) Calcd for  $\text{C}_{12}\text{H}_{18}\text{O}_2$   $[\text{M}]^+$ :194.1307; Found 194.1306.

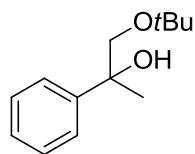

**13h**

**1-(tert-butoxy)-2-phenylpropan-2-ol (13h).** Prepared according to the general procedure B employing **1a** (36.0 mg, 0.30 mmol),  $\text{Acr}^+\text{MesClO}_4^-$  (6.7 mg, 0.016 mmol), 4Å MS (71.0 mg), MeCN (5.5 mL) and MeOH (0.5 mL).

After 3 h,  $\text{PPh}_3$  (79.7 mg, 0.30 mmol) was added and stirred at rt for 30 min. The reaction mixture was diluted with  $\text{Et}_2\text{O}$  and passed through a short pad of silica gel. The filtrate was condensed and purified by flash column chromatography using PE/EA (10:1) as an eluent to afford **13h** (21.1 mg, 0.10 mmol, 33% yield) as a colorless oil. IR  $\nu$  3563, 2975, 1365, 1194, 1089  $\text{cm}^{-1}$ ;  $^1\text{H}$  NMR (400 MHz,  $\text{CDCl}_3$ )  $\delta$  7.47 (d,  $J = 8.0$  Hz, 2H), 7.34 (dd,  $J = 7.6, 7.6$  Hz, 2H), 7.27-7.21 (m, 1H), 3.45 (d,  $J = 8.4$  Hz, 1H), 3.41 (d,  $J = 8.8$  Hz, 1H), 3.06 (s, 1H), 1.51 (s, 3H), 1.16 (s, 9H);  $^{13}\text{C}$  NMR (101 MHz,  $\text{CDCl}_3$ )  $\delta$  145.9, 128.0, 126.7, 125.0, 73.4, 73.2, 69.8, 27.5, 26.6; HRMS (EI-TOF) Calcd for  $\text{C}_{13}\text{H}_{20}\text{O}_2$   $[\text{M}]^+$ :208.1463; Found 208.1459.

## VII. Reference

- <sup>1</sup> D. S. Hamilton, D. A. Nicewicz, *J. Am. Chem. Soc.* **2012**, *134*, 18577.
- <sup>2</sup> C. (Dennis) Huang, A. G. Doyle, *J. Am. Chem. Soc.* **2015**, *137*, 5638.

- 
- <sup>3</sup> F. J. Barrios, B. C. Springer, D. A. Colby, *Org. Lett.* **2013**, *15*, 3082.
- <sup>4</sup> M. Brown, R. Kumar, J. Rehbein, T. Wirth, *Chem. Eur. J.* **2016**, *22*, 4030.
- <sup>5</sup> P. Lu, T. Hou, X. Gu, P. Li. *Org. Lett.* **2015**, *17*, 1954
- <sup>6</sup> A. Theodorou, I. Triandafillidi, C. G. Kokoto. *Eur. J. Org. Chem.* **2017**, 1502.
- <sup>7</sup> A. Wang, H. Jiang. *J. Org. Chem.* **2010**, *75*, 2321.
- <sup>8</sup> J. H. Kim, I. Čorić, C. Palumbo, B. List *J. Am. Chem. Soc.* **2015**, *137*, 1778.
- <sup>9</sup> M. Cleij, A. Archelas, R. Furstoss. *J. Org. Chem.* **1999**, *64*, 5029.
- <sup>10</sup> J. D. Weaver, D. K. Morris, J. A. Tunge. *Synlett* **2010**, 470.
- <sup>11</sup> R. P. Hof, R. M. Kellogg. *J. Chem. Soc. Perkin Transactions 1: Organic and Bio-Organic Chemistry* (1996), (16), 2051-2060. Publisher: (Royal Society of Chemistry, ) CODEN:JCPRB4 ISSN:0300-922X.
- <sup>12</sup> M. Dochnahl, G. C. Fu. *Angew. Chem. Int. Ed.* **2009**, *48*, 2391.
- <sup>13</sup> K. M. Jones, N. C. O. Tomkinson, *J. Org. Chem.* **2012**, *77*, 921.
- <sup>14</sup> J. Koyanagi. *Chem. Pharm. Bull.* **2014**, *62*, 816.
- <sup>15</sup> K. Sarma, N. Borthakur, A. Goswami. *Tetrahedron Lett.* **2007**, *48*, 6776.
- <sup>16</sup> Z. Hou, K. Takamine, O. Aoki, H. Shiraishi, Y. Fujiwara, H. Taniguchi. *J. Org. Chem.* **1988**, *53*, 6077.
- <sup>17</sup> X. Jing, D. Yuan, L. Yu. *Adv. Synth. Catal.* **2017**, *359*, 1194.
- <sup>18</sup> E. J. Gilbert, W. J. Greenlee, M. W. Miller, J. D. Scott, A. W. A. Stamford. U.S. Pat. Appl. Publ., 20130072468, 21 Mar 2013
- <sup>19</sup> X. Yan, C. Qiao, Z. Guo. *Synlett* **2013**, *24*, 502.
- <sup>20</sup> A. Duchene, D. Mouko-Mpegna, Quintard, P. Jean, *Journal fuer Praktische Chemie (Leipzig)*, **1985**, *5*, 787.

## VIII. NMR Spectra

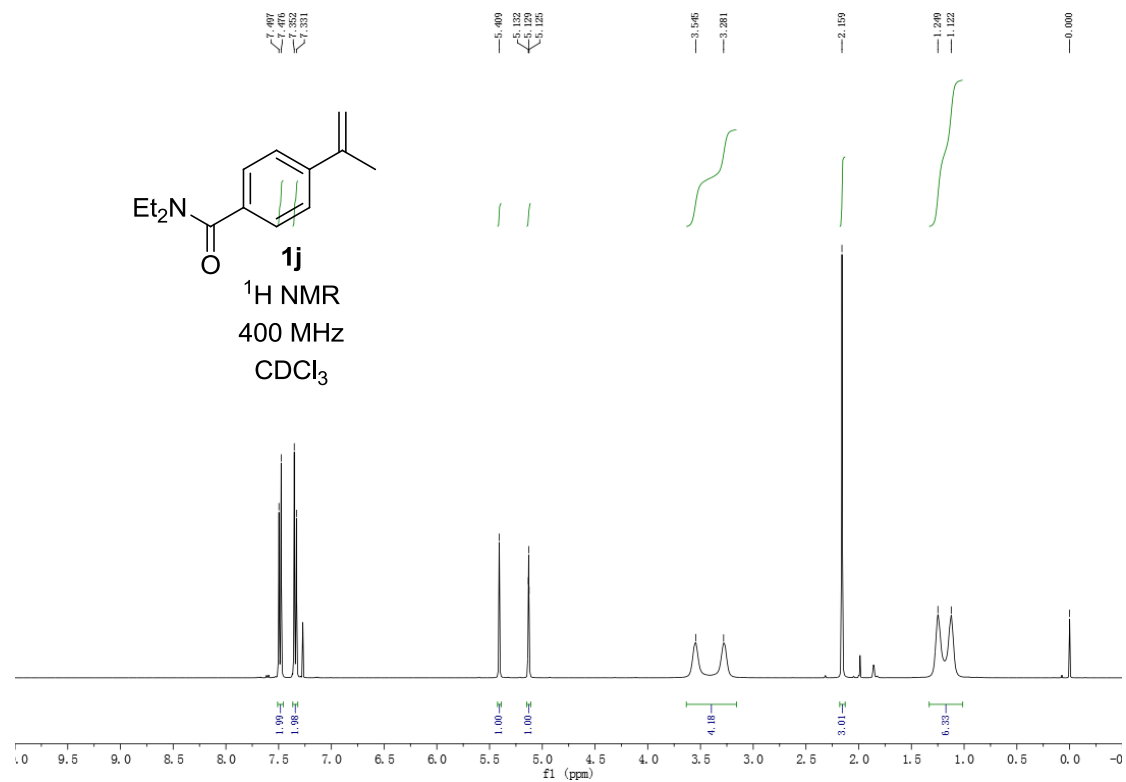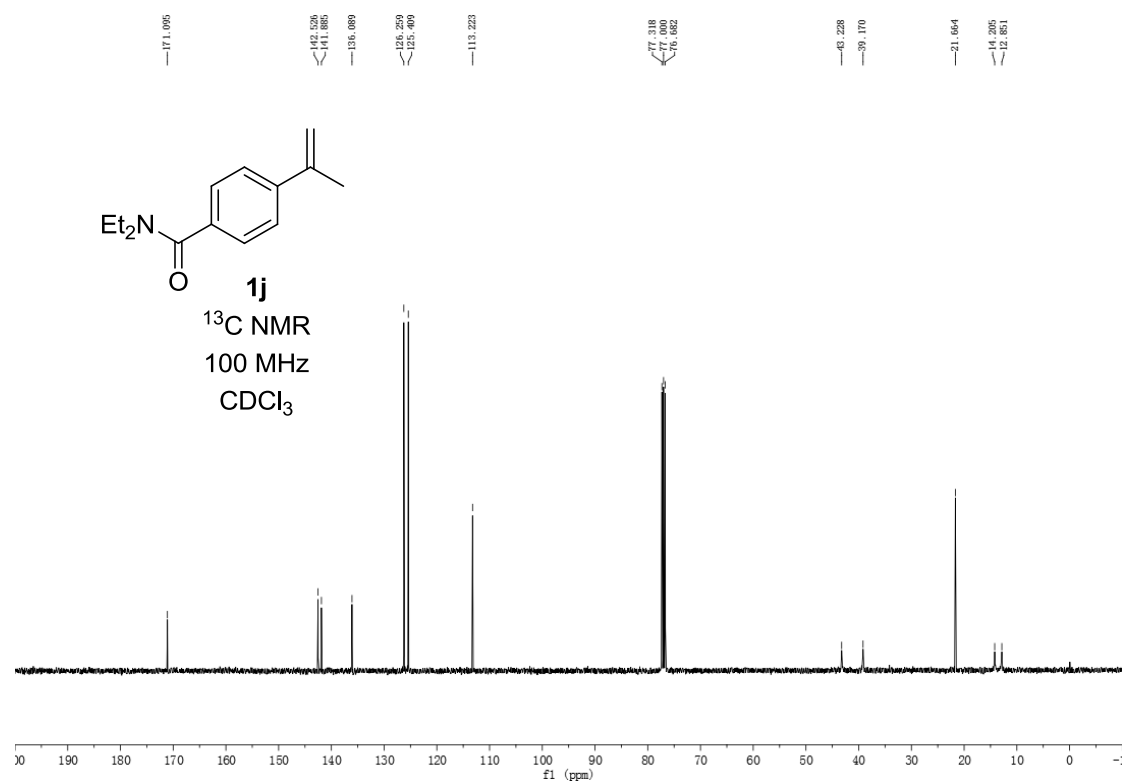

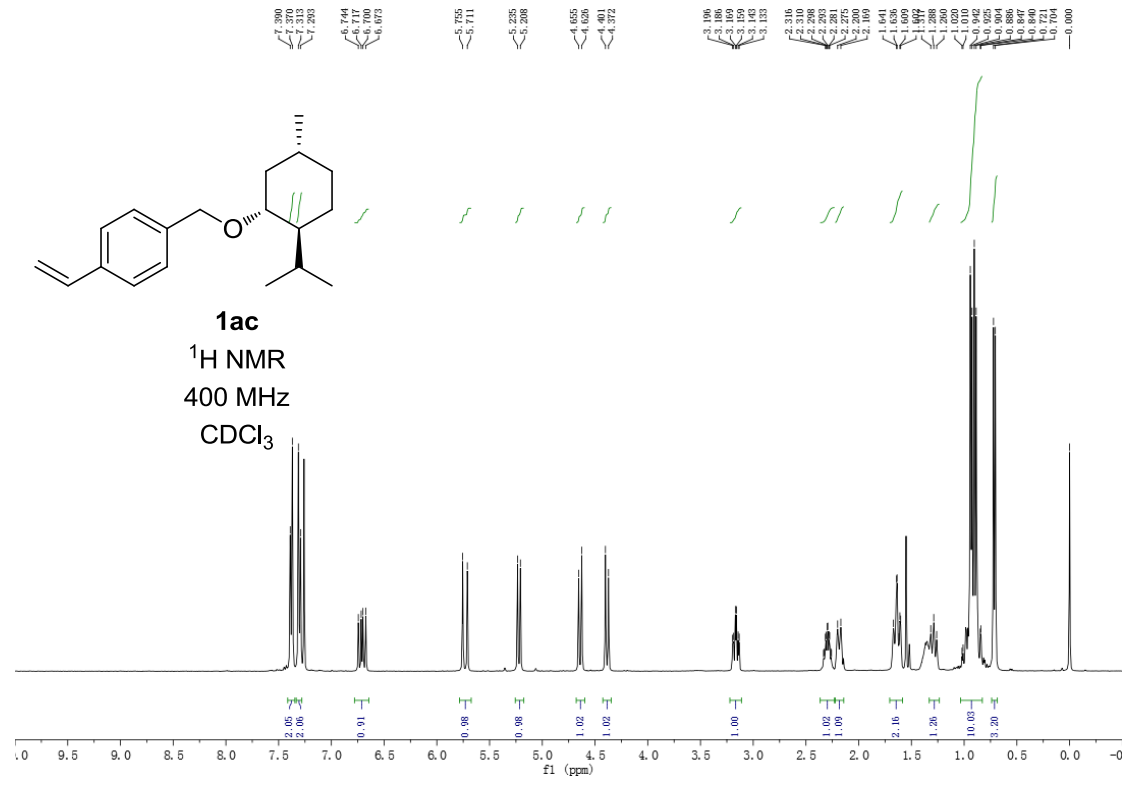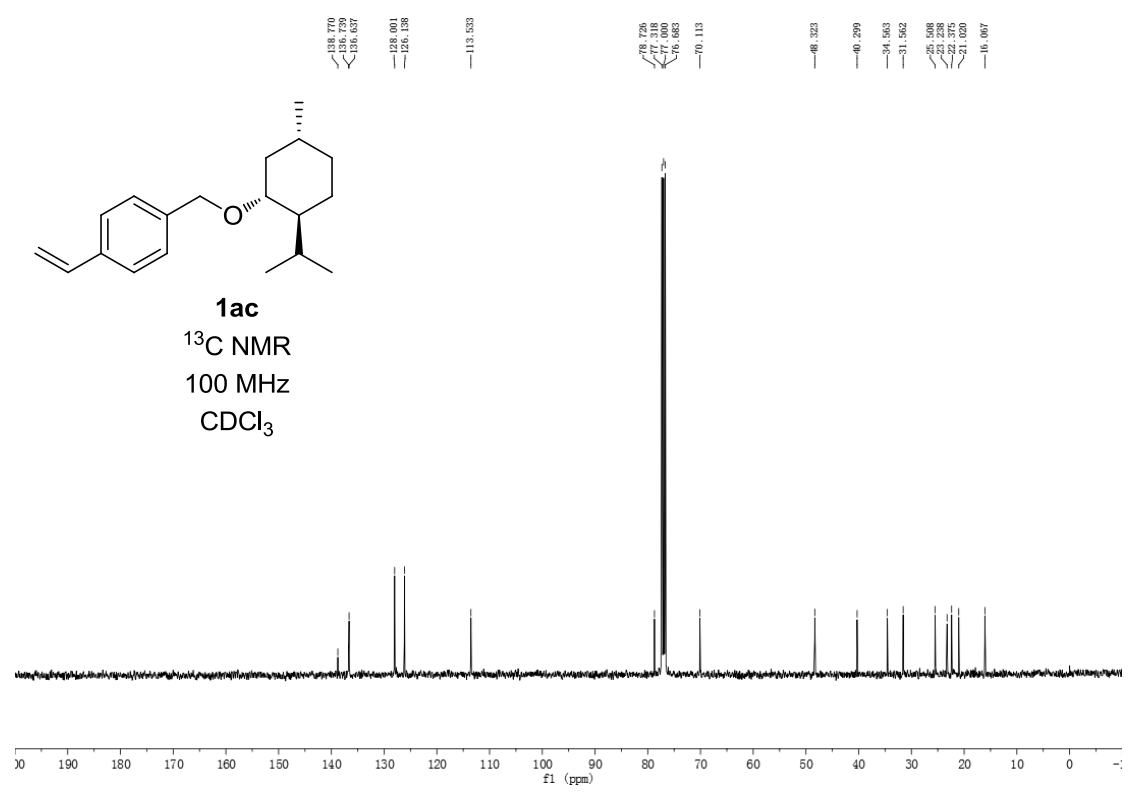



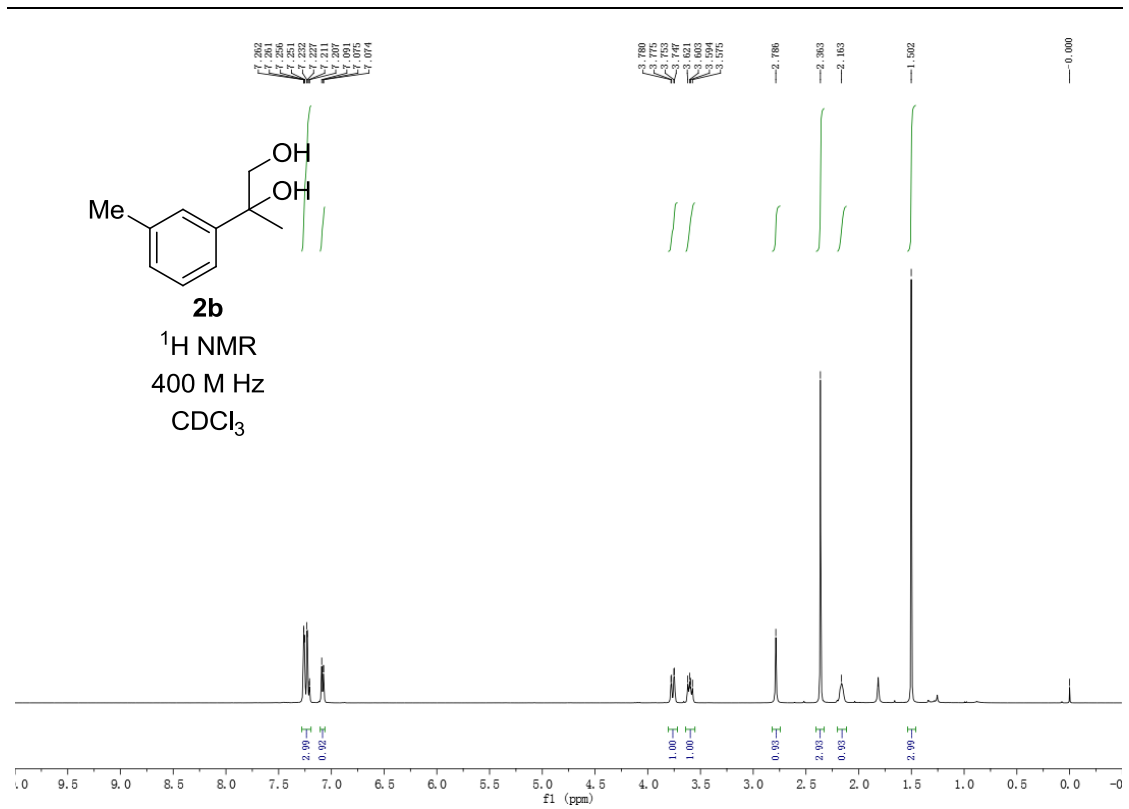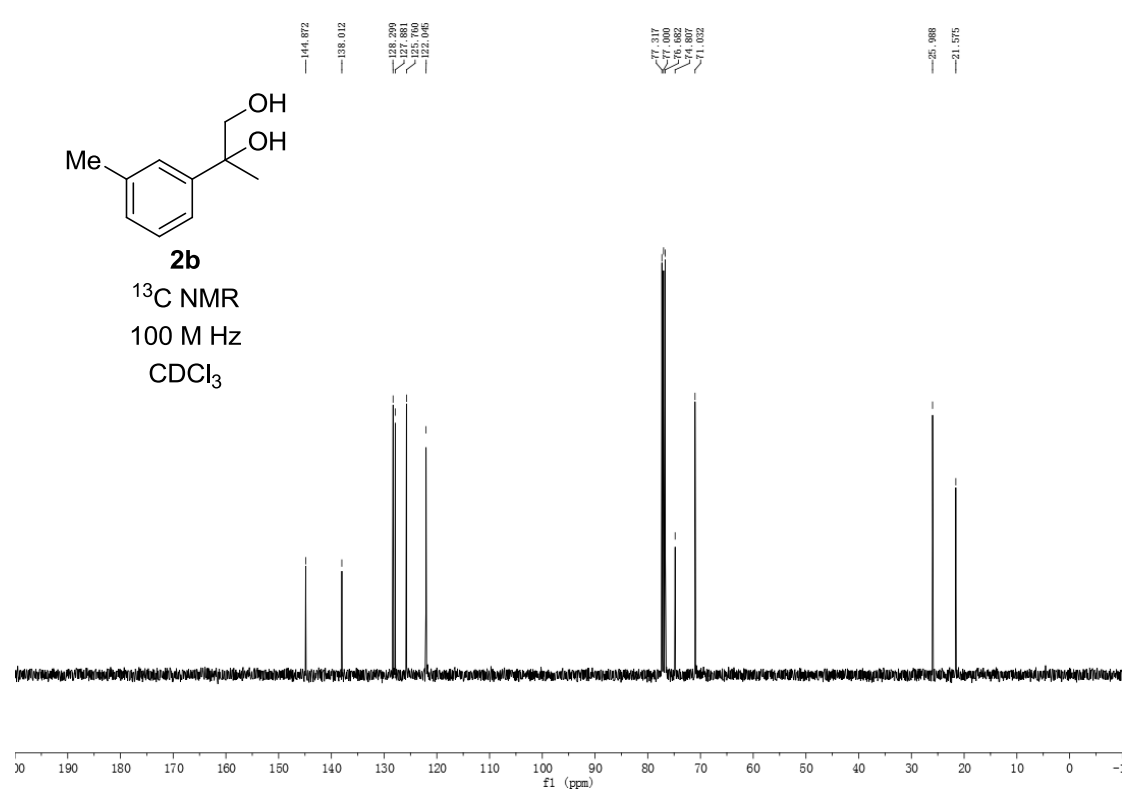



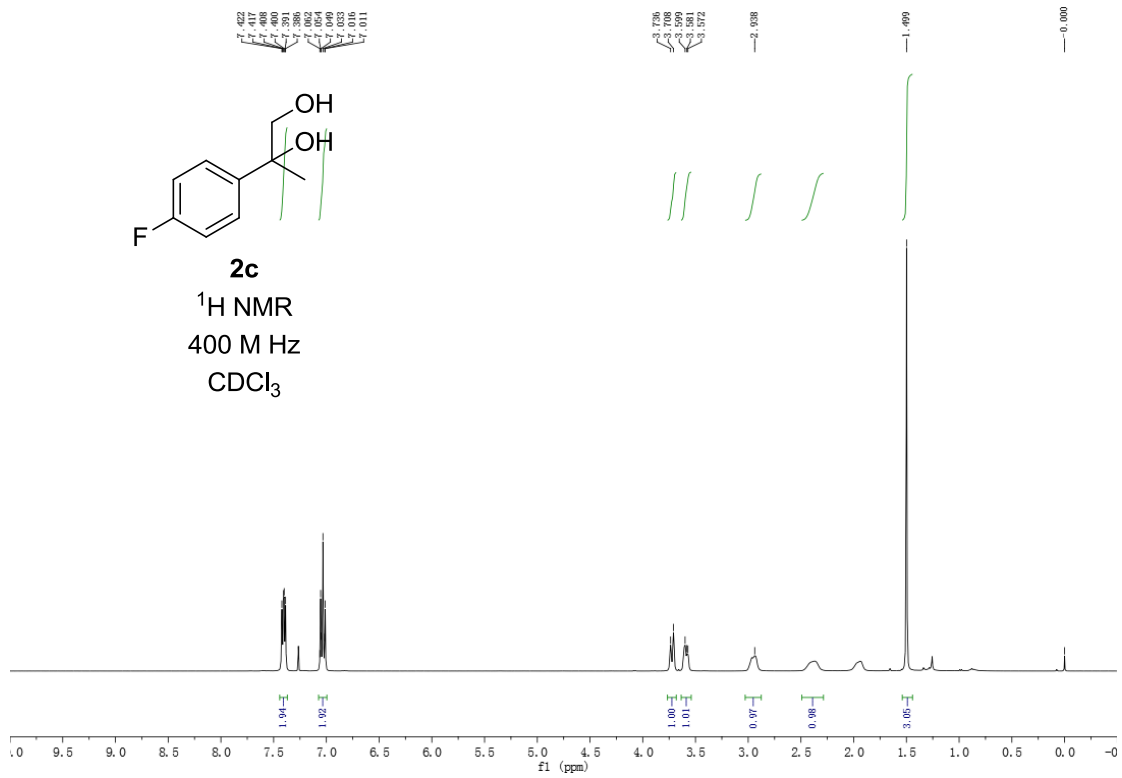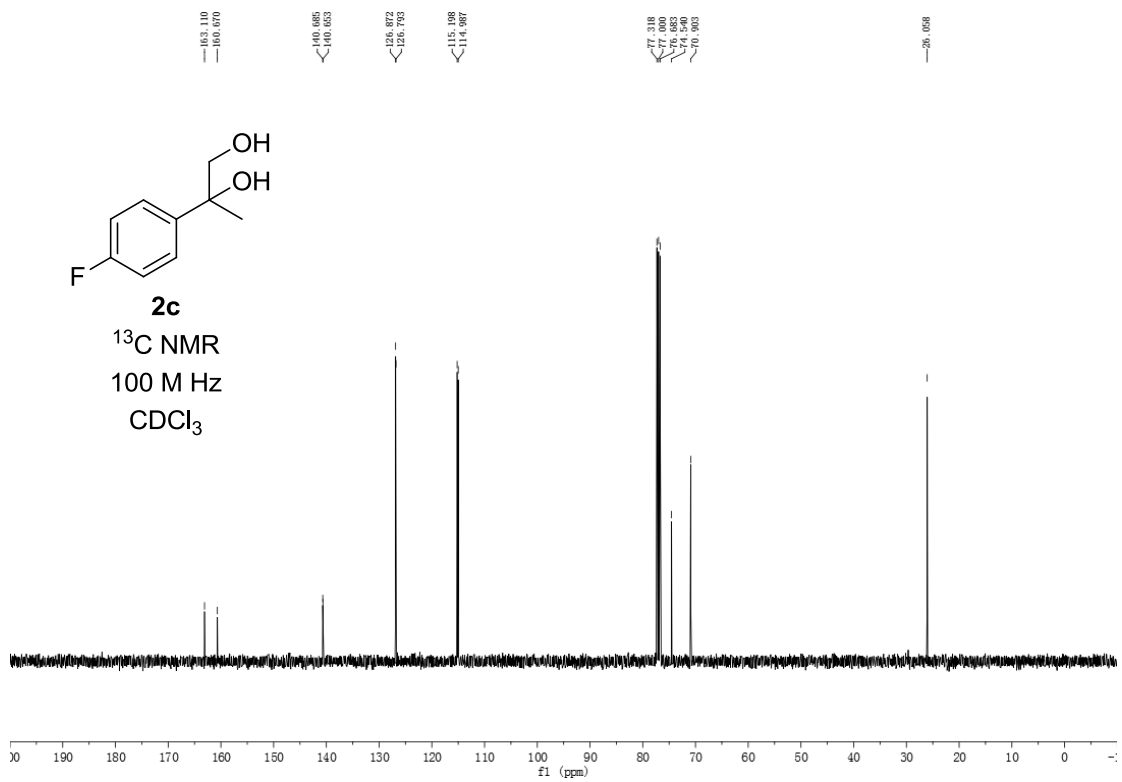

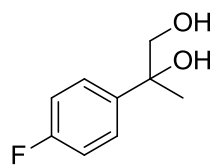

**2c**

<sup>19</sup>F NMR

376 MHz

CDCl<sub>3</sub>

-115.99

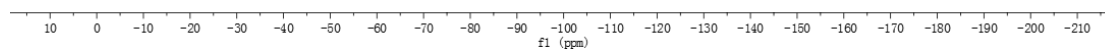

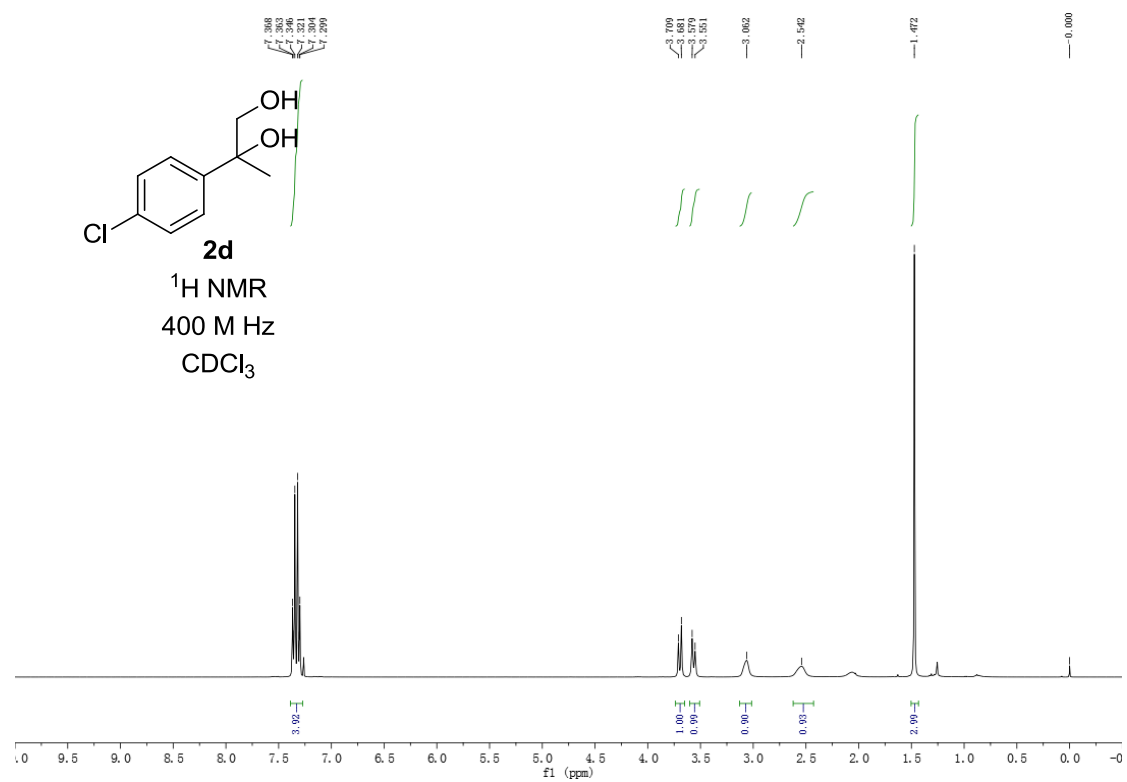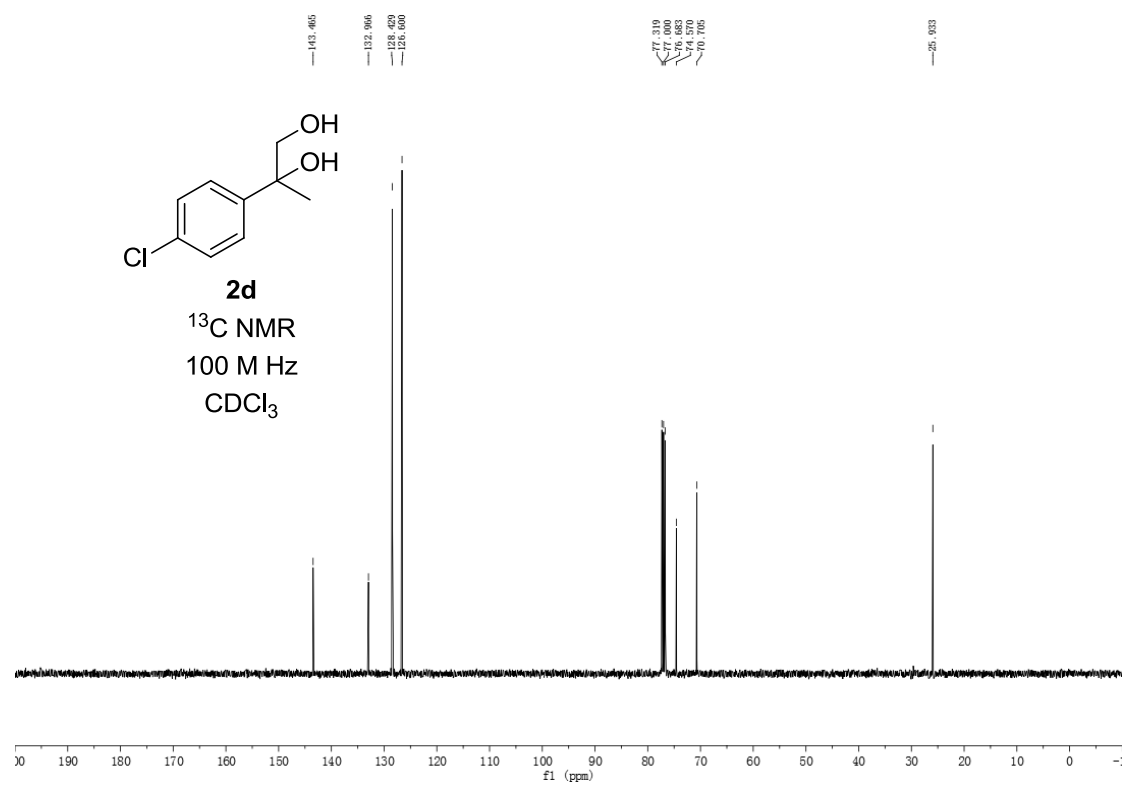

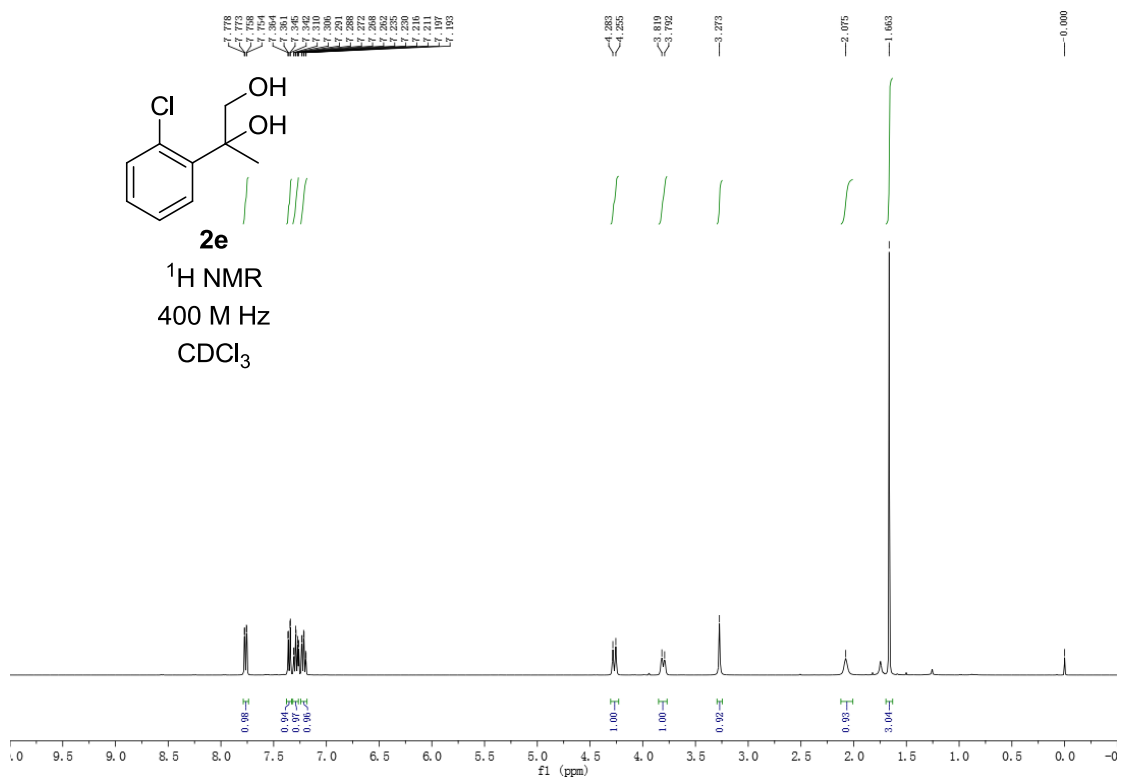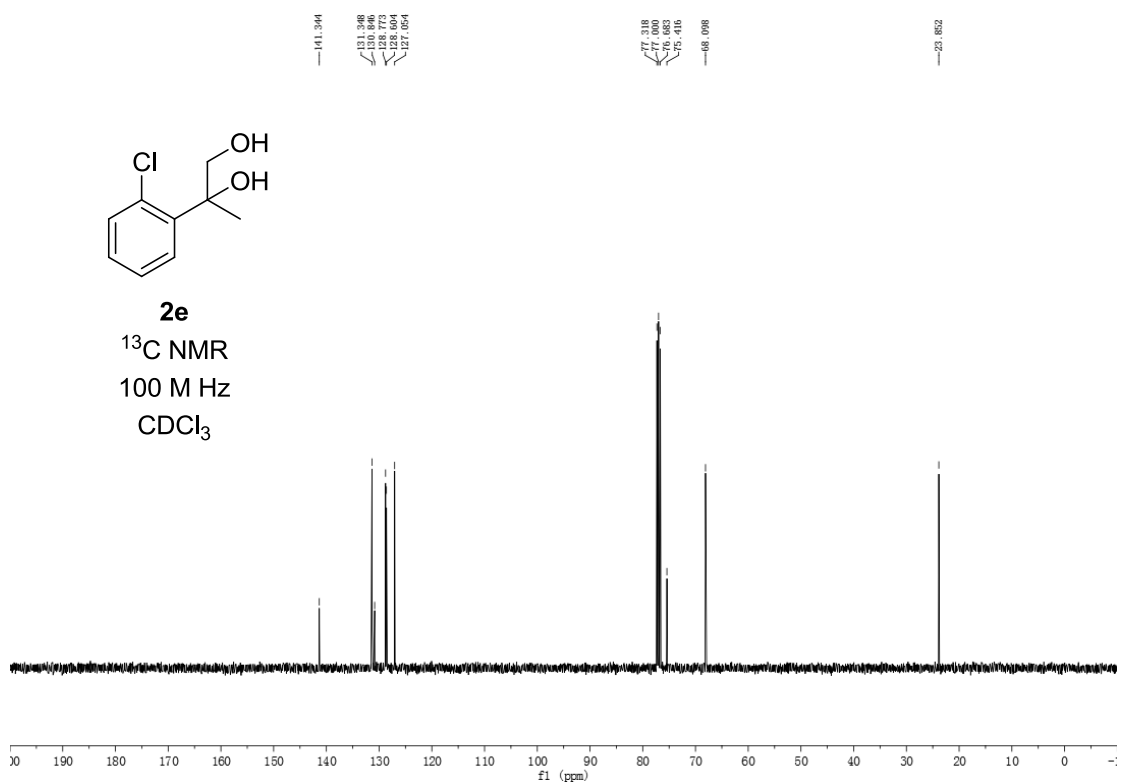

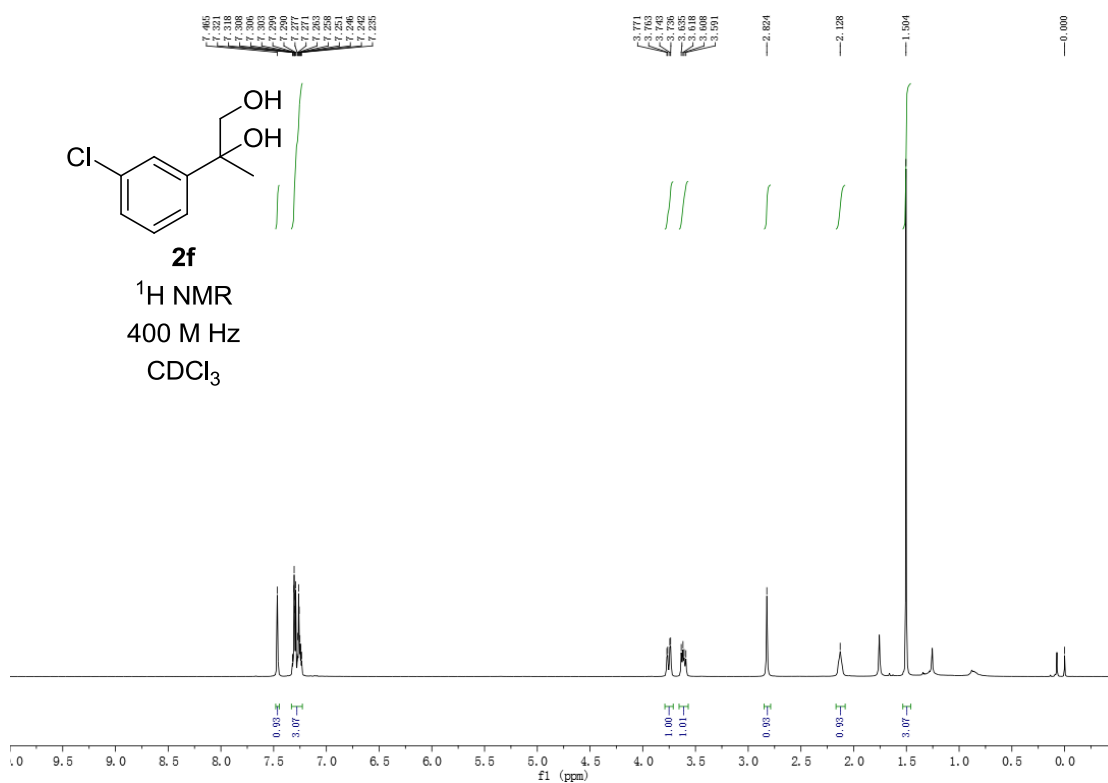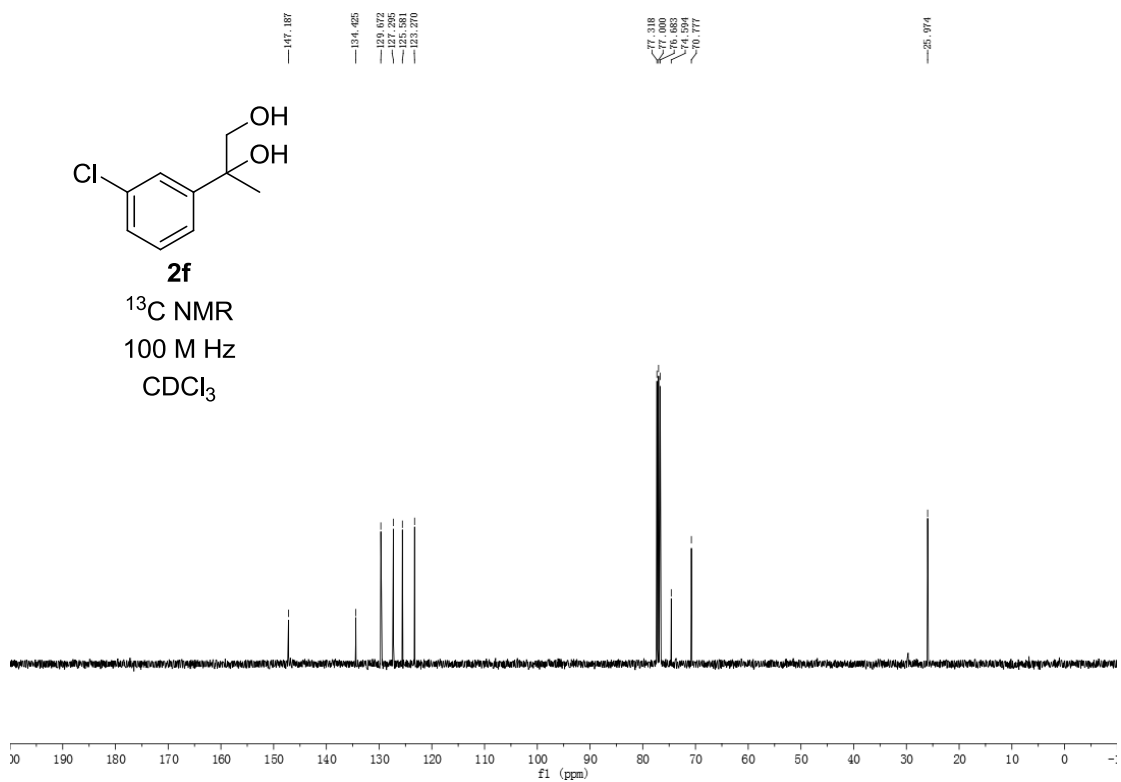

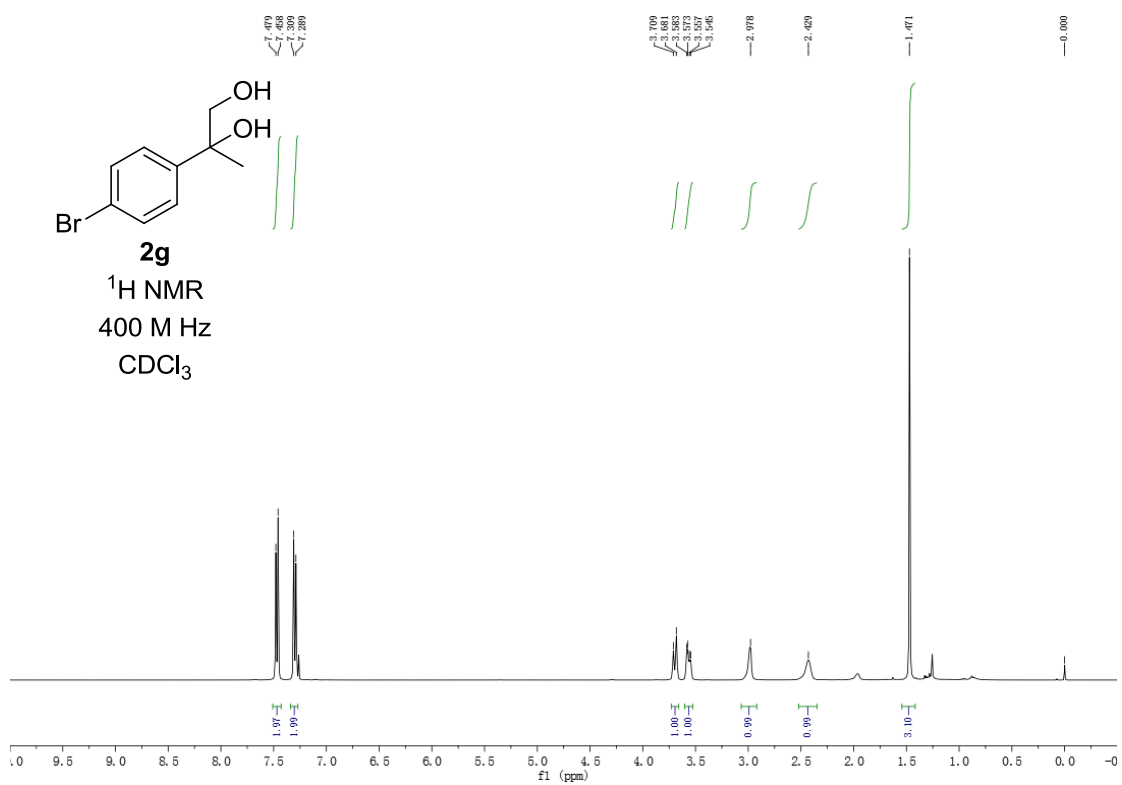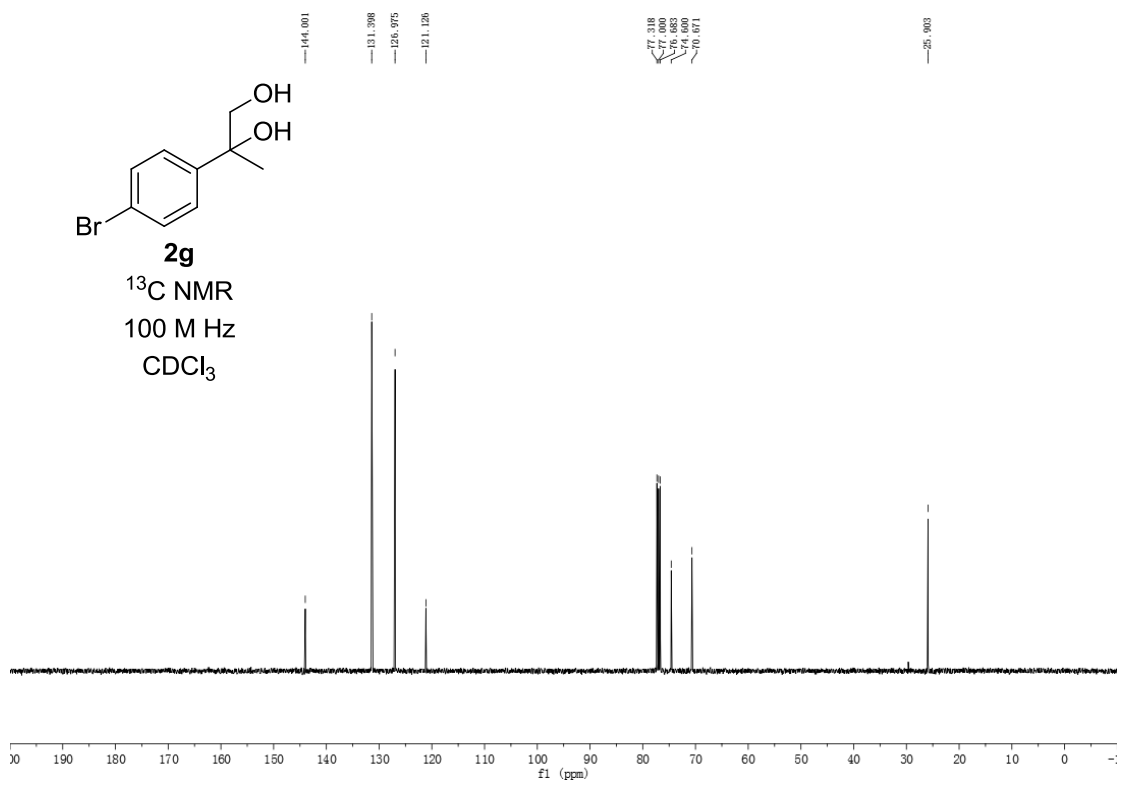

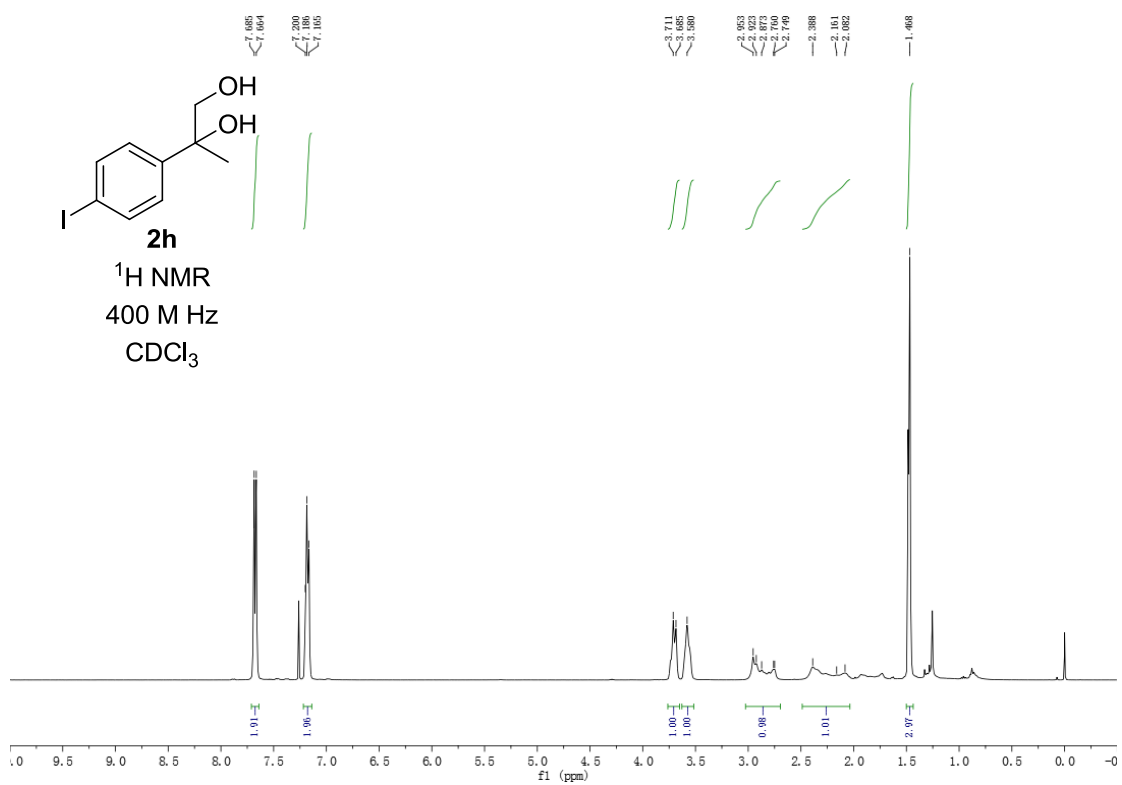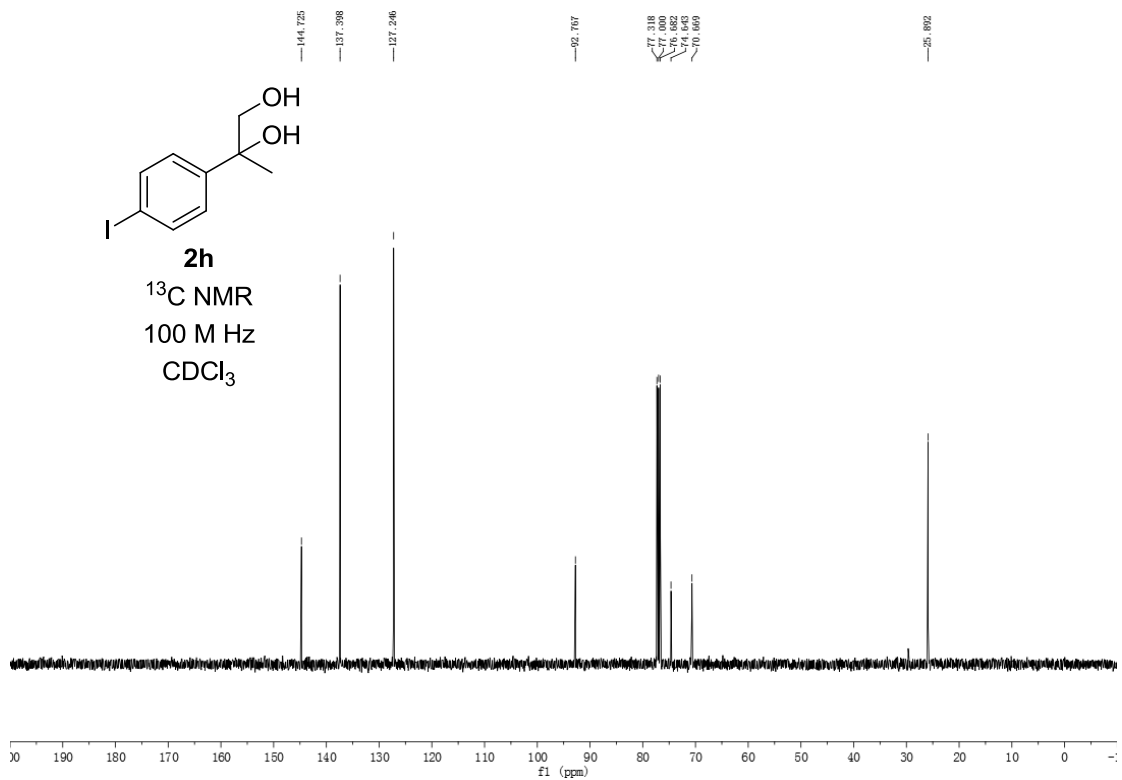

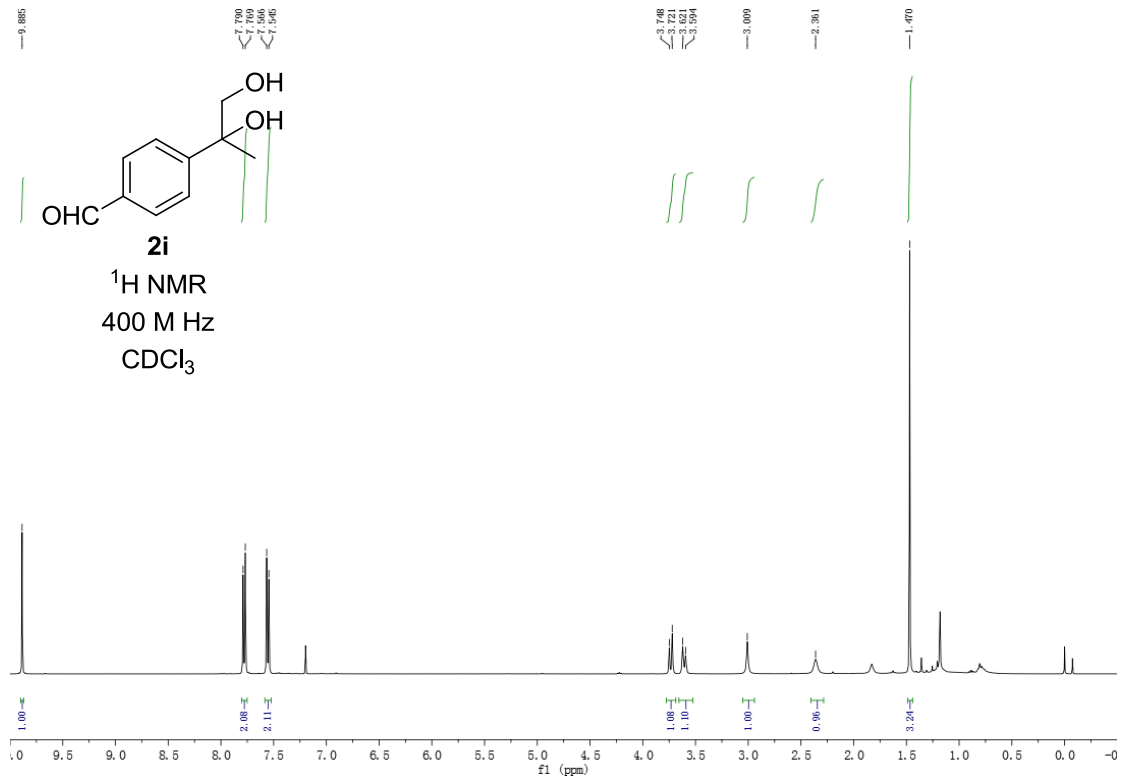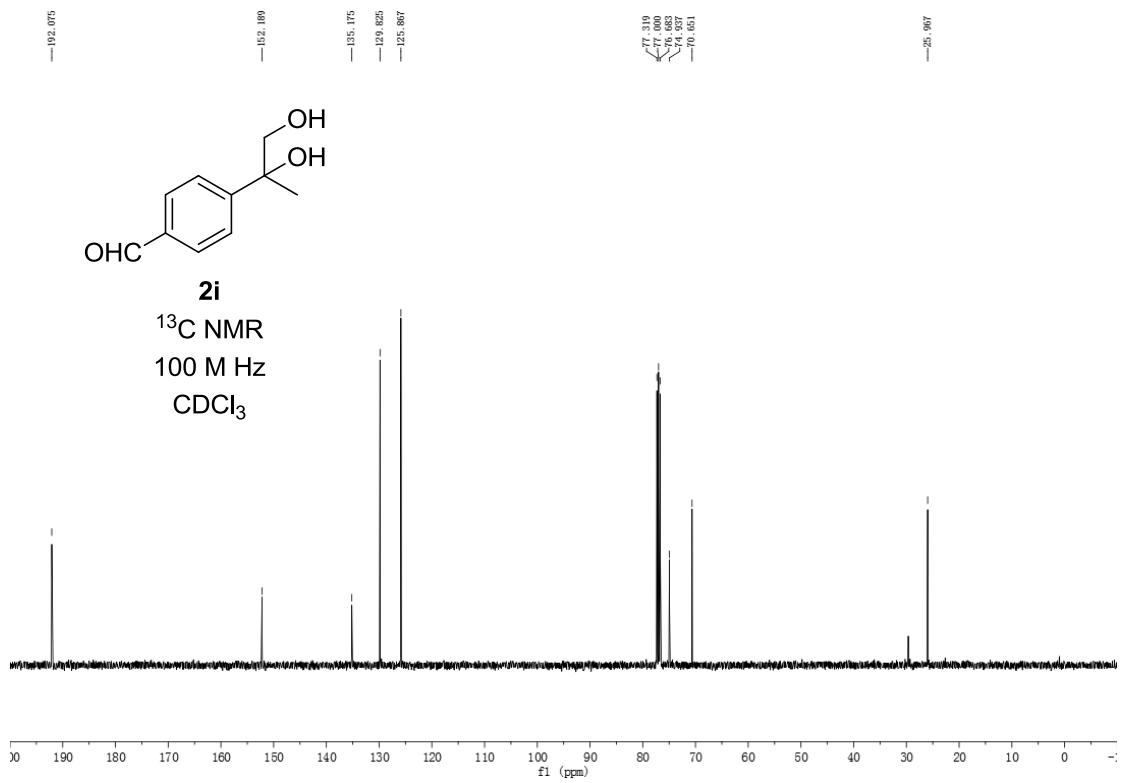



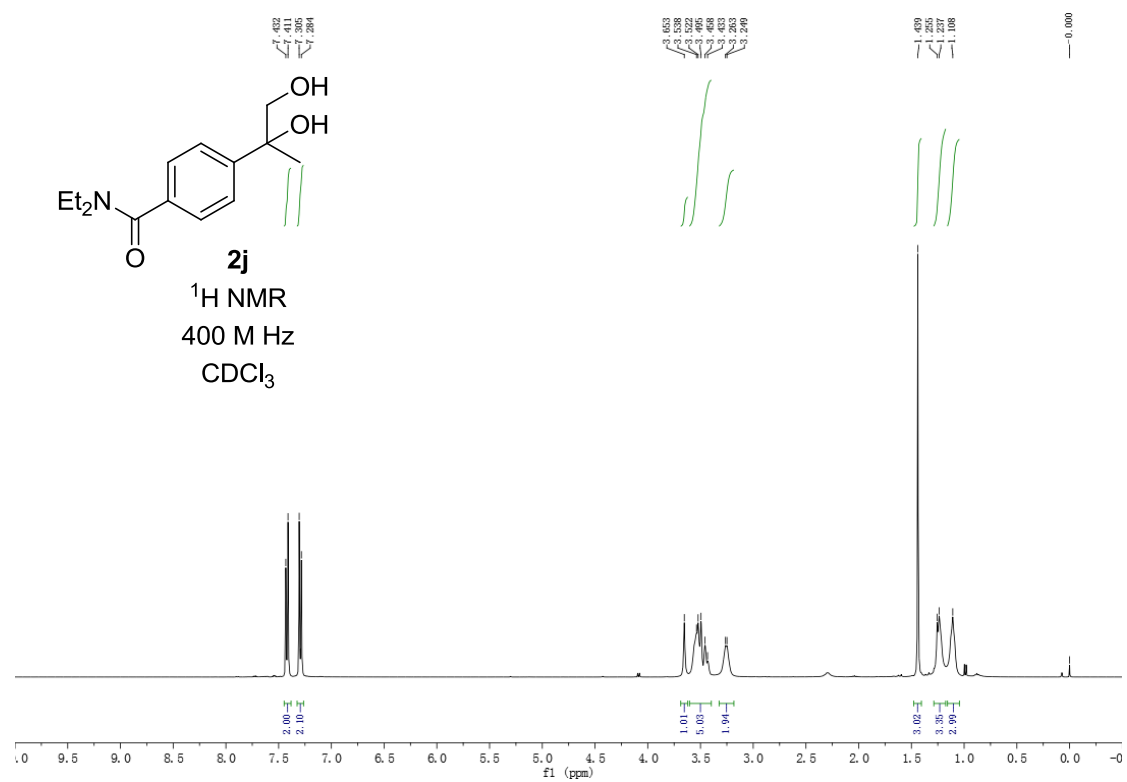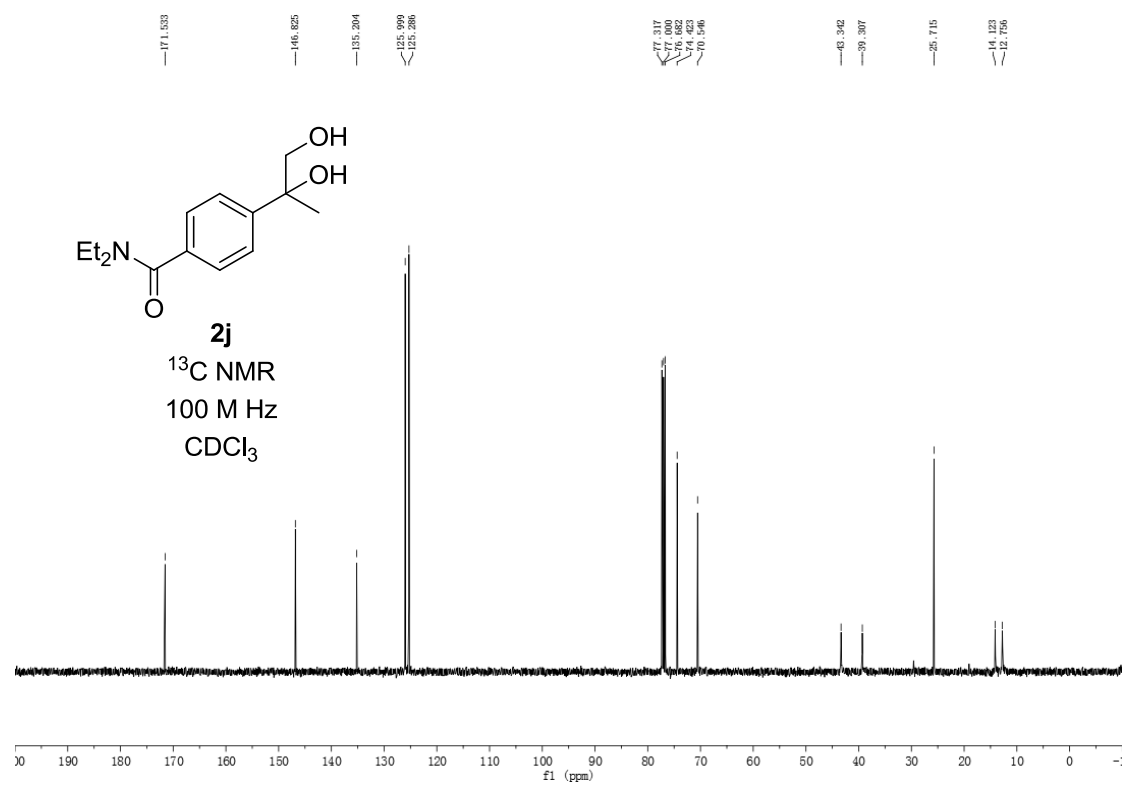

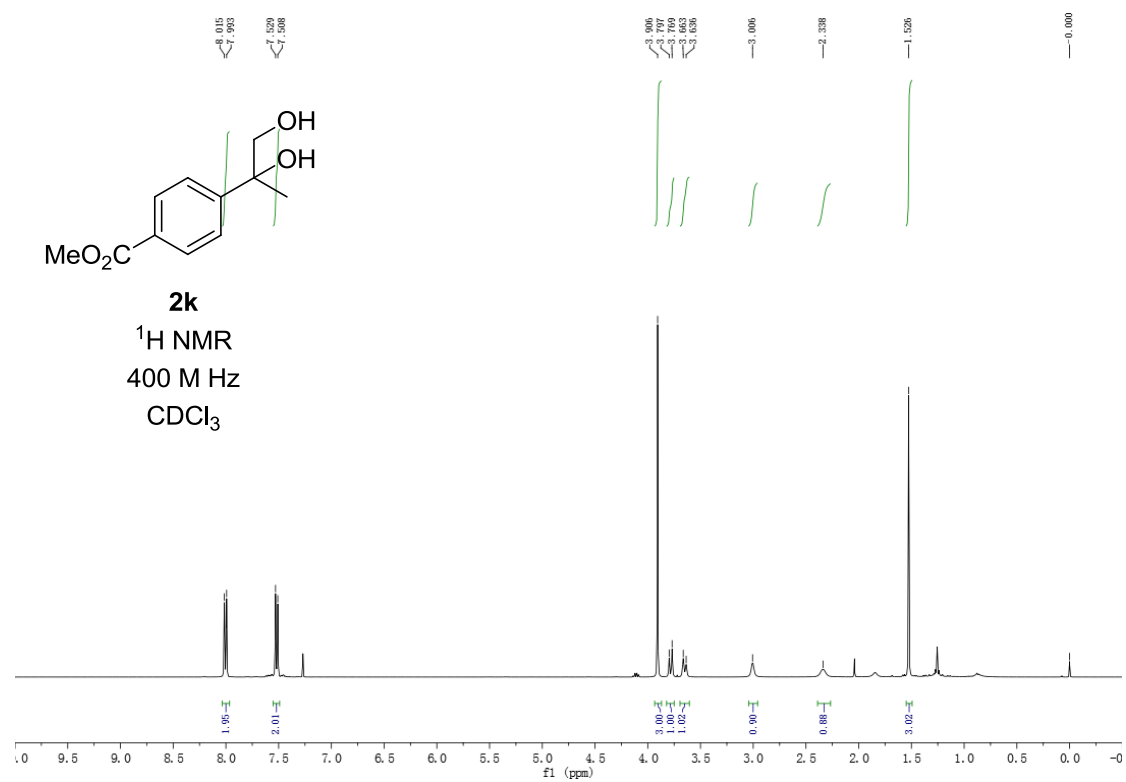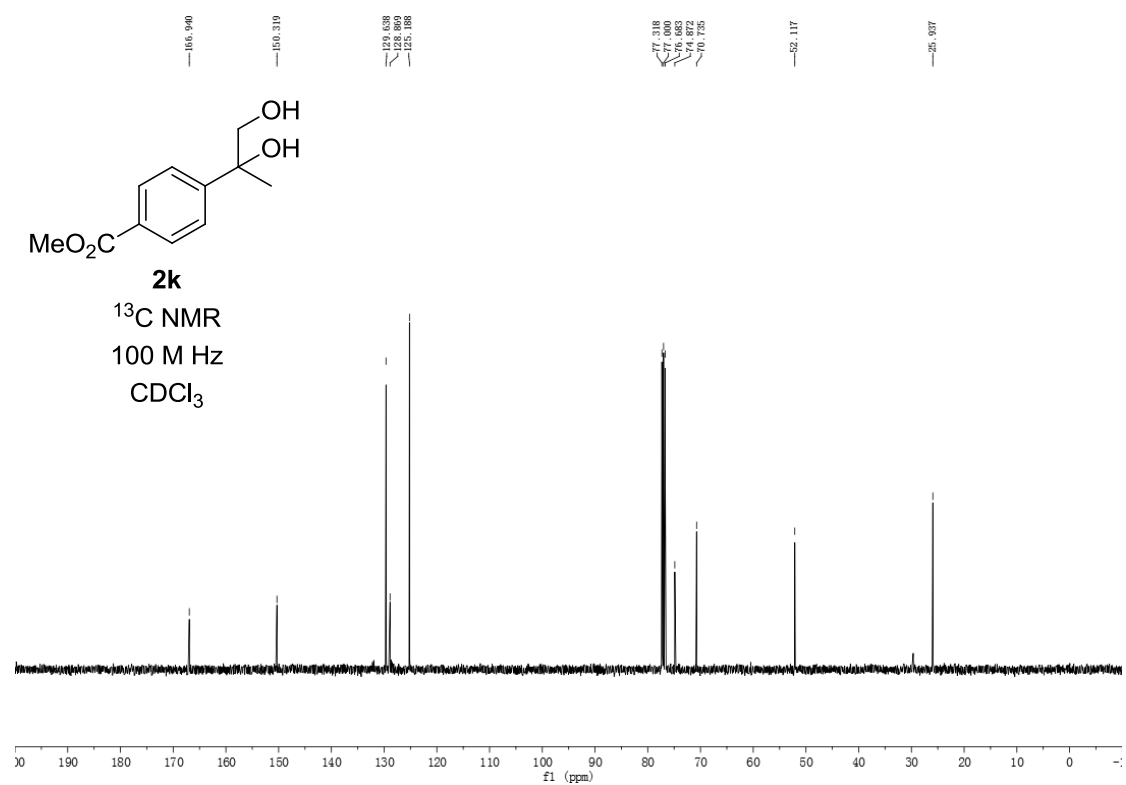

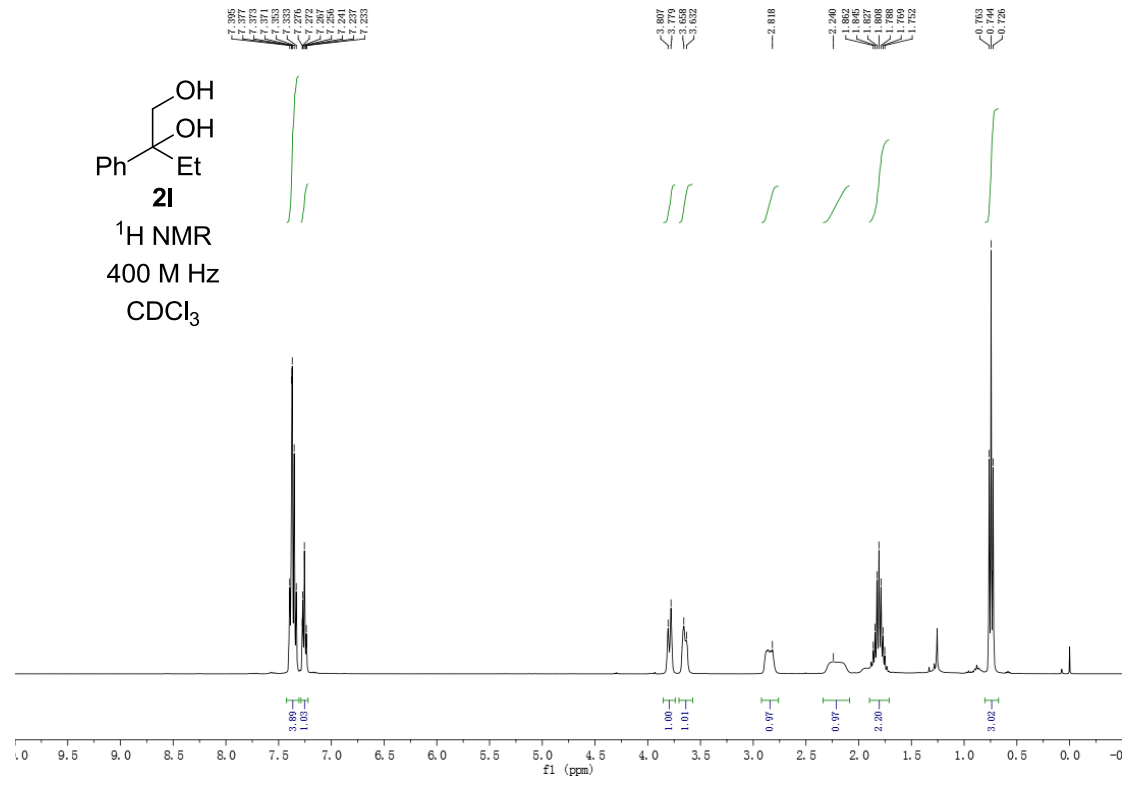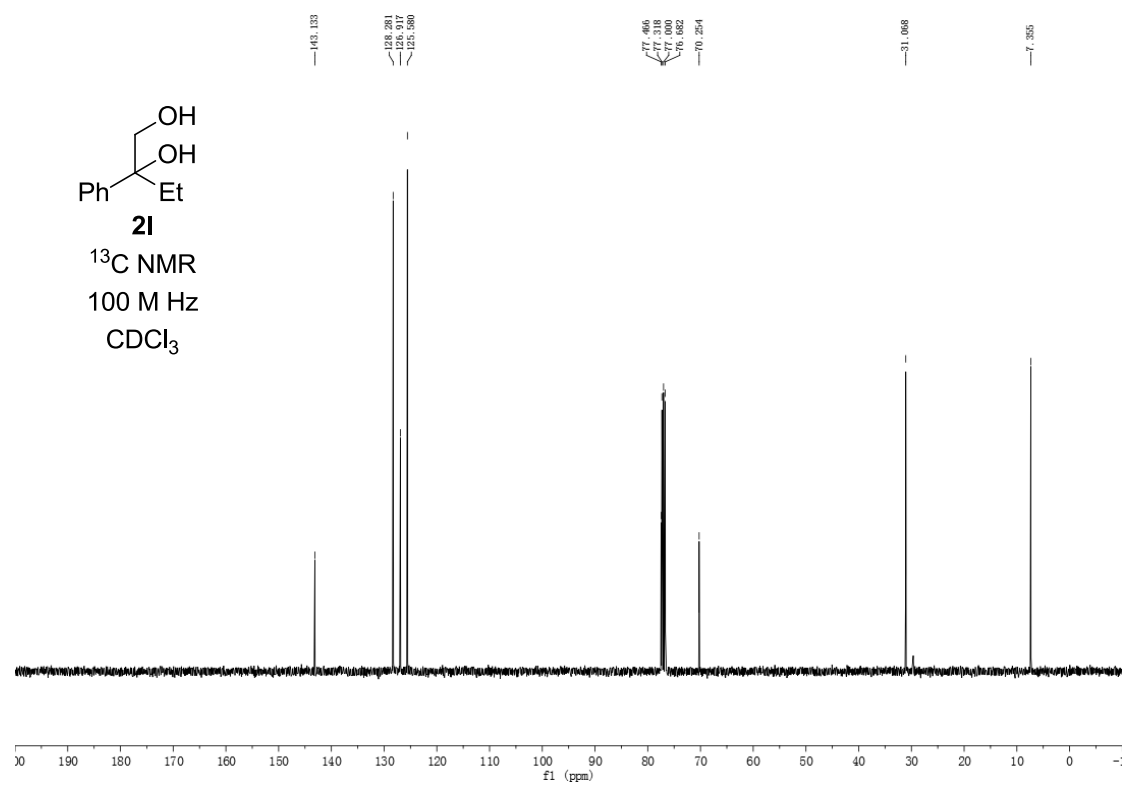

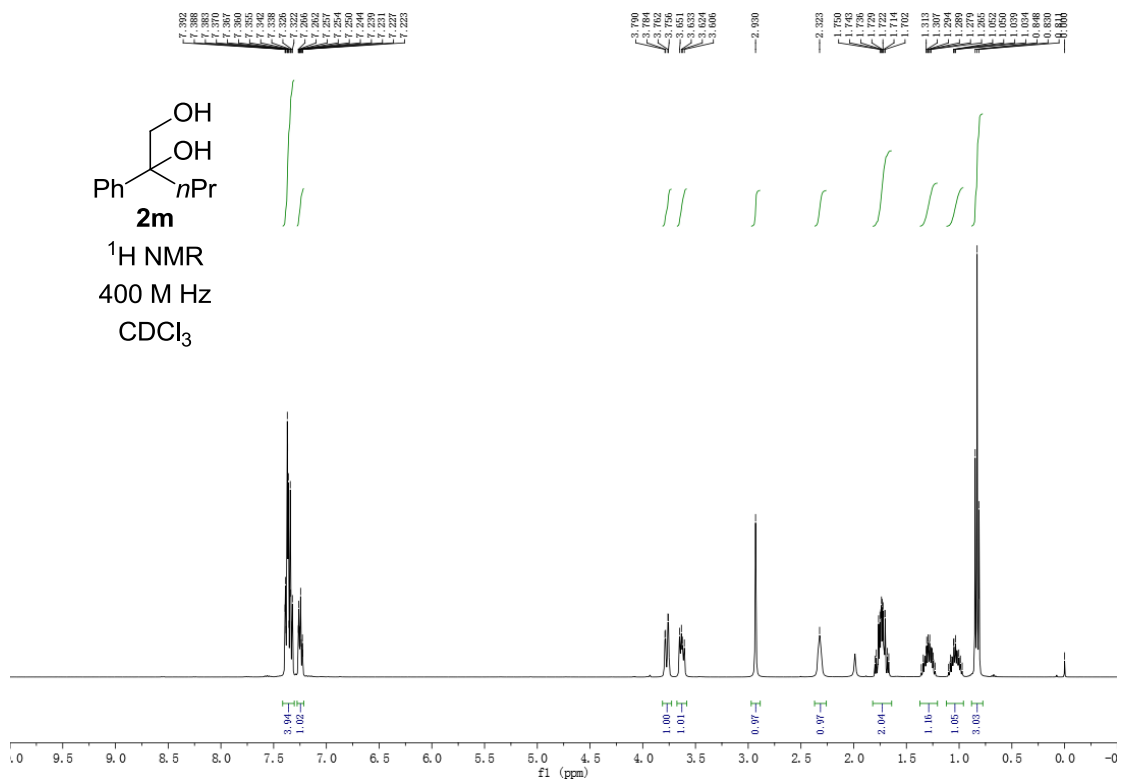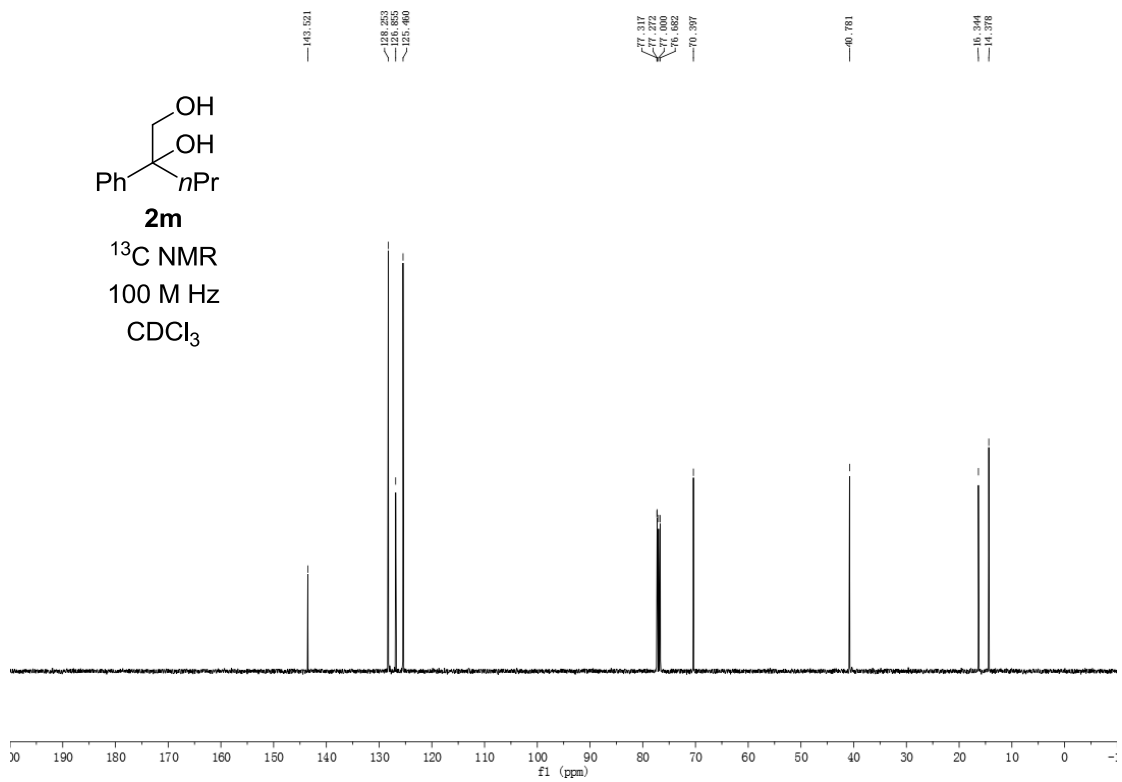

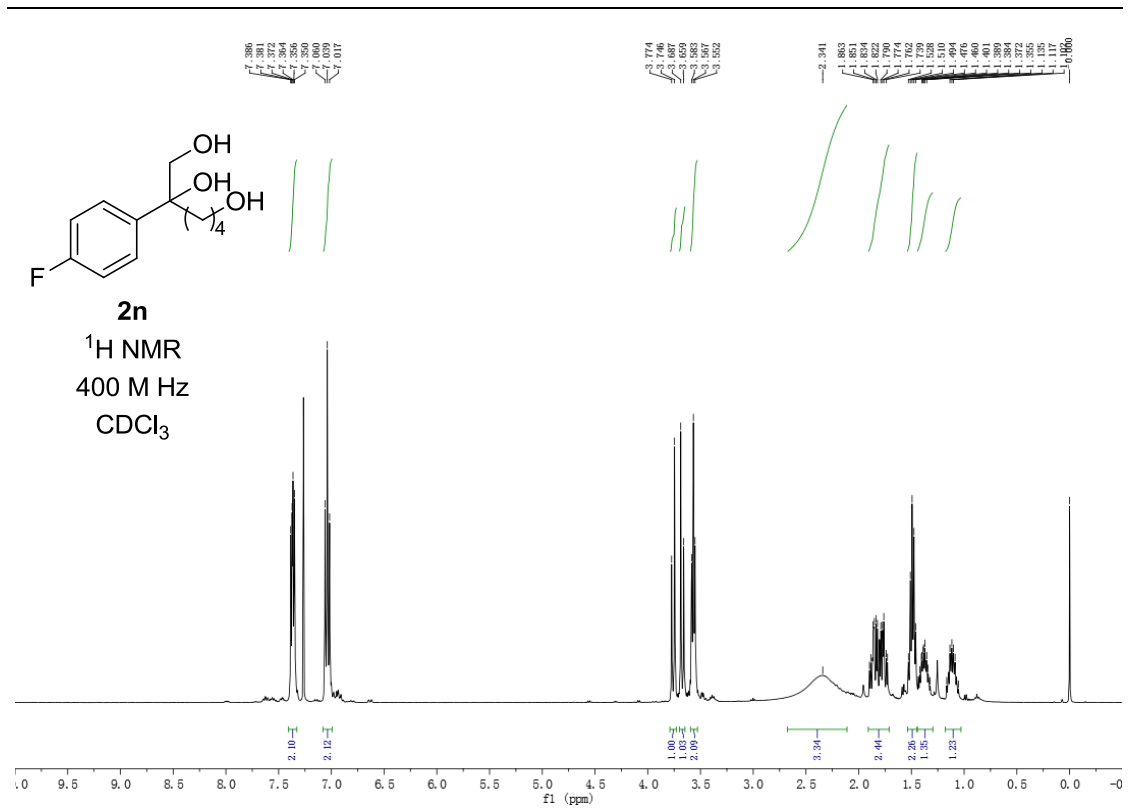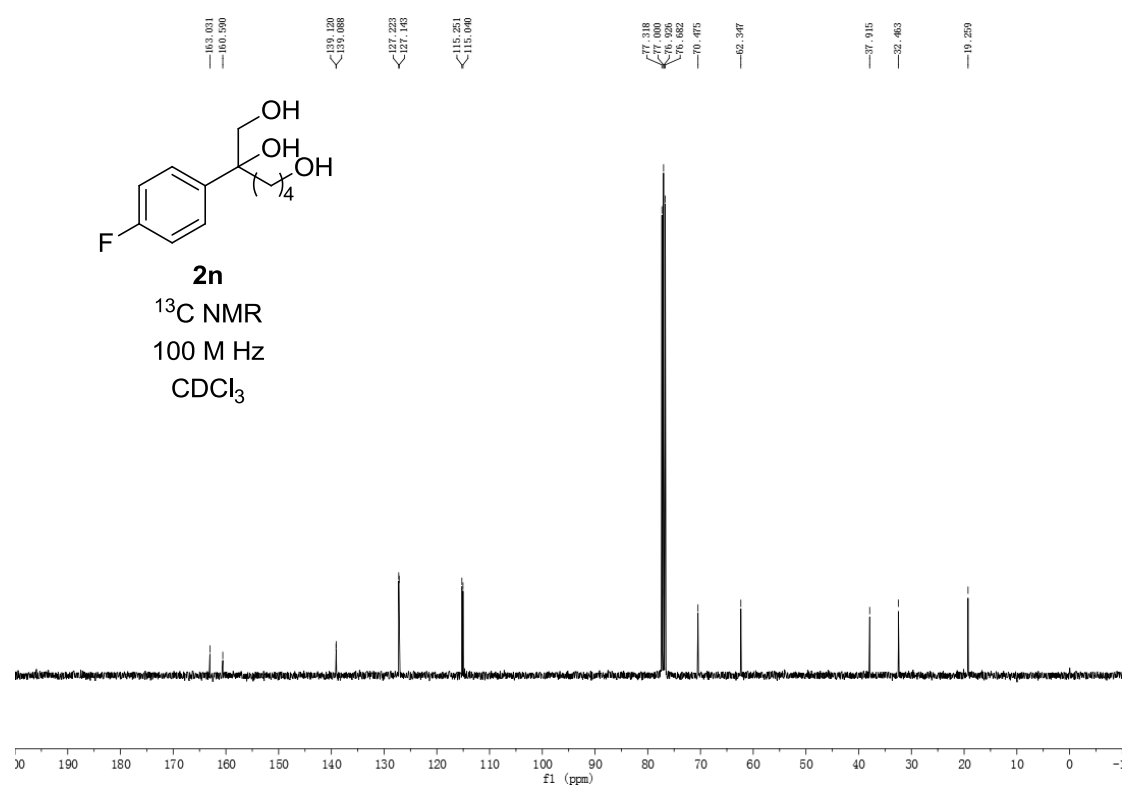



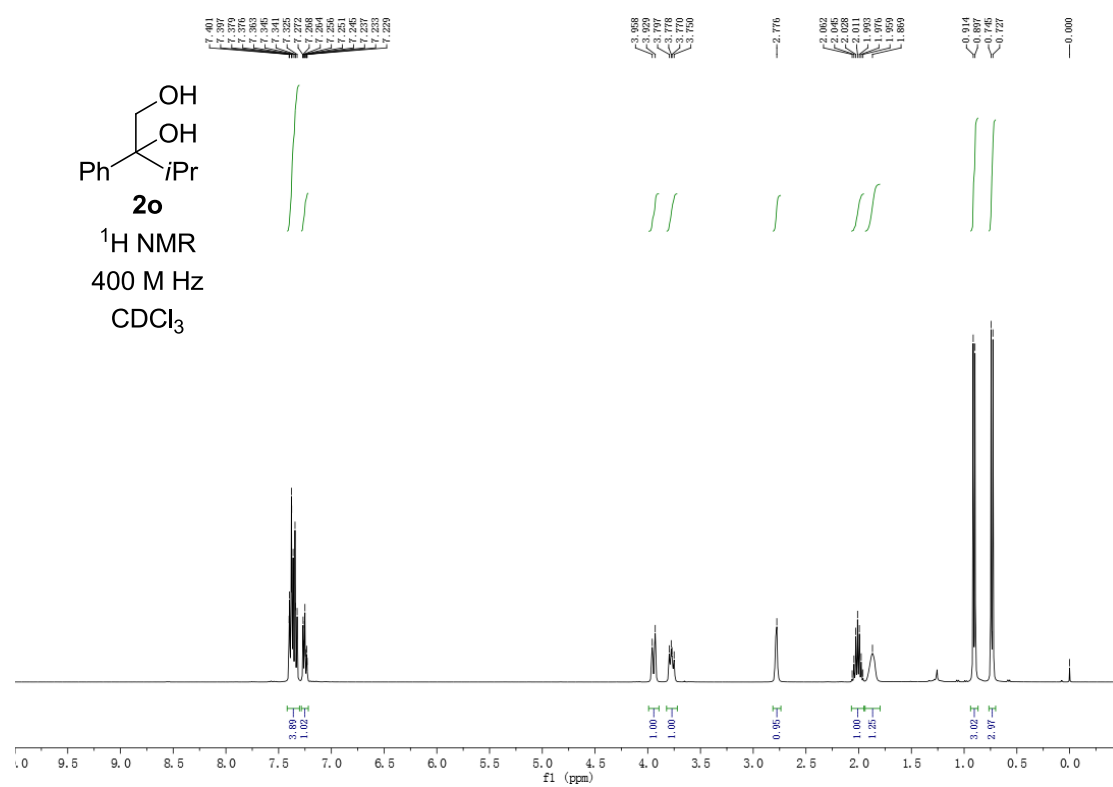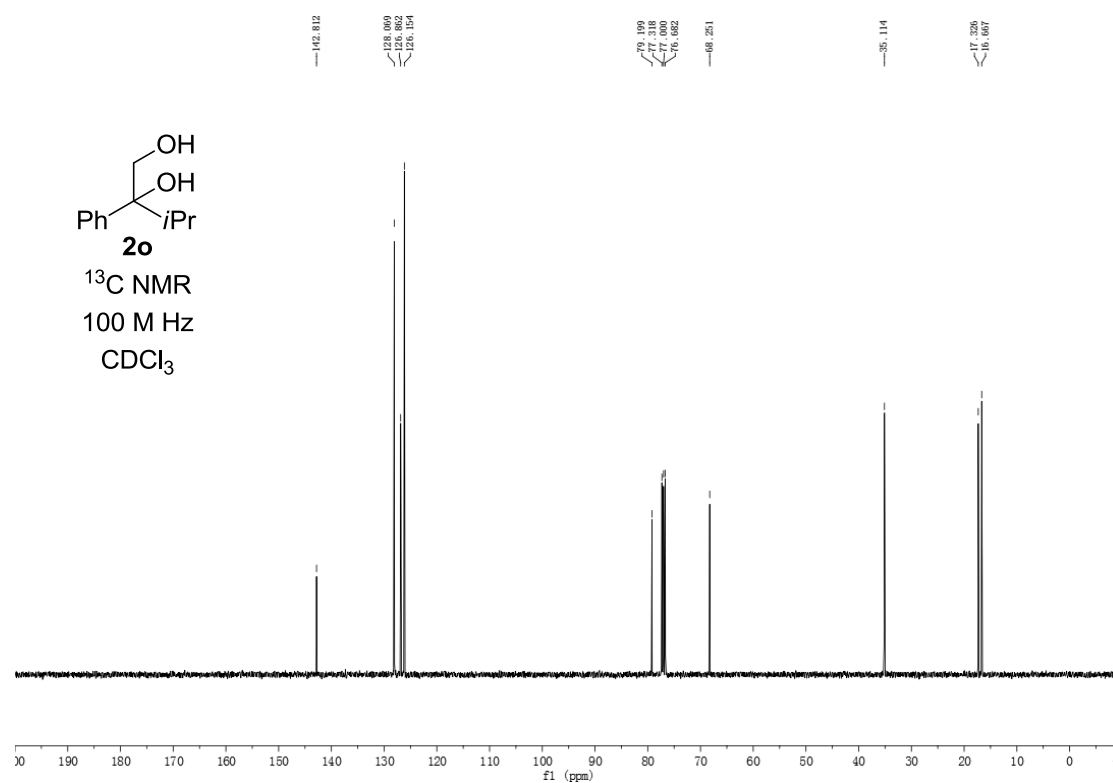

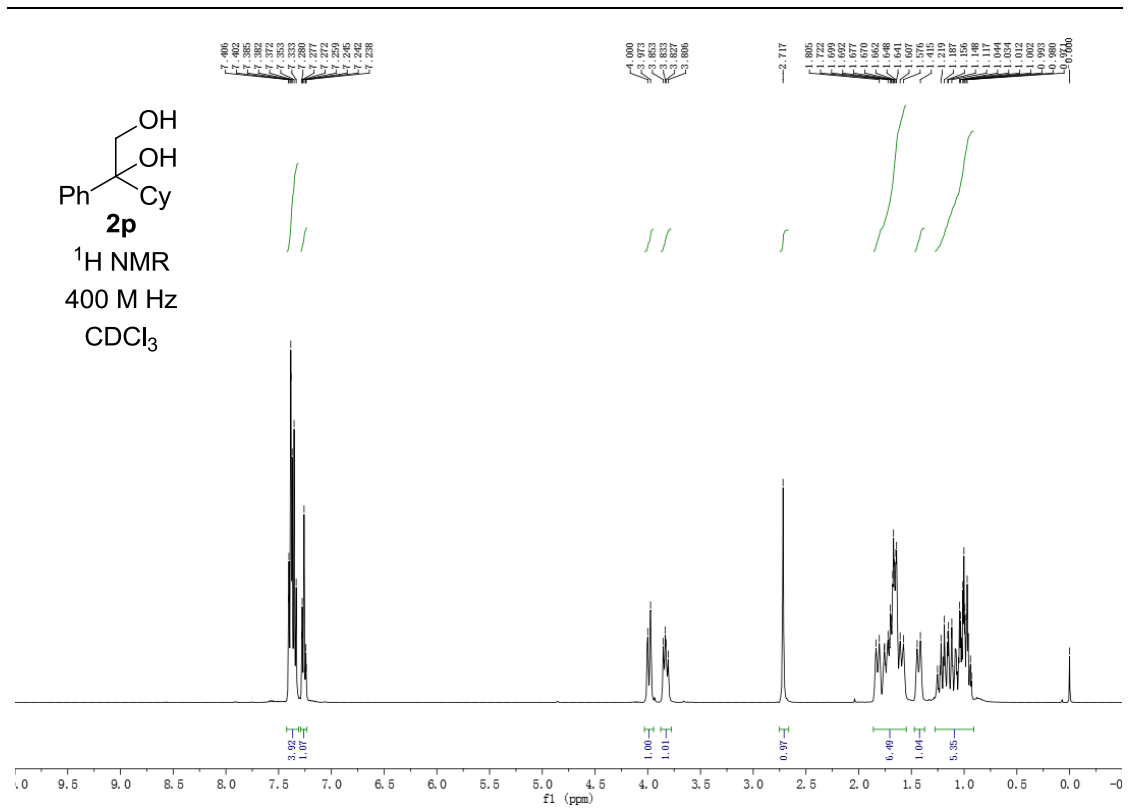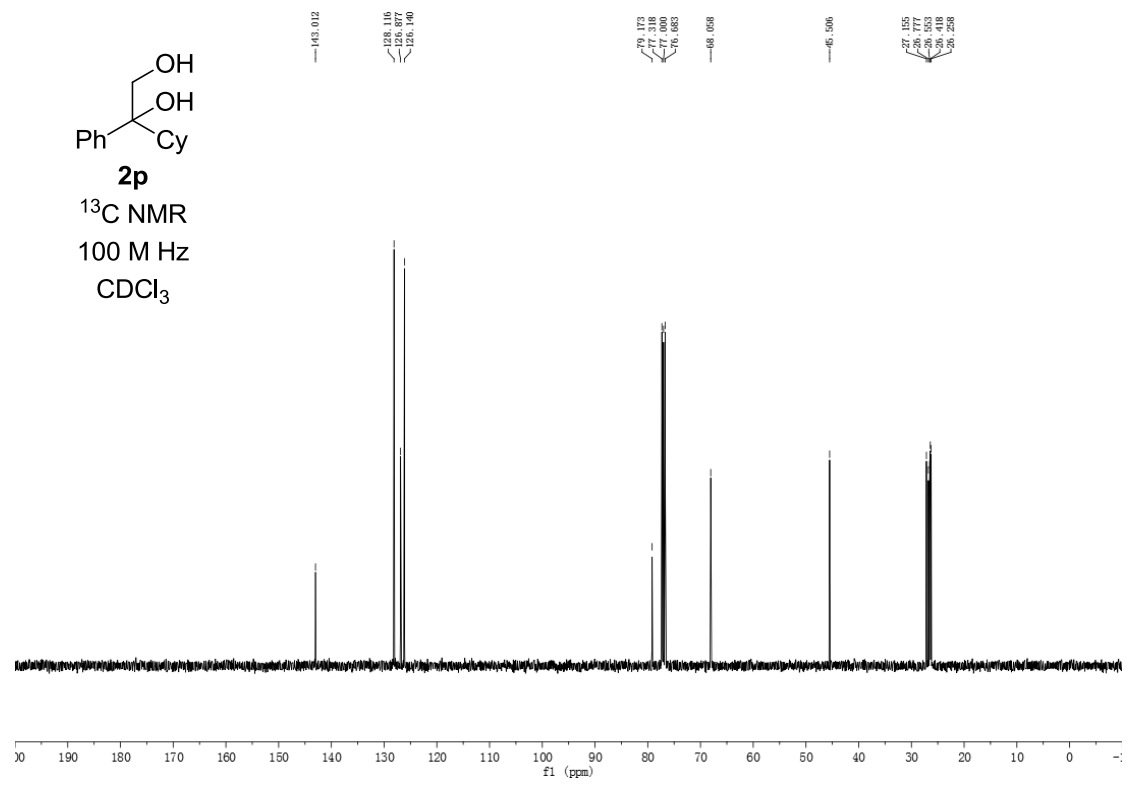



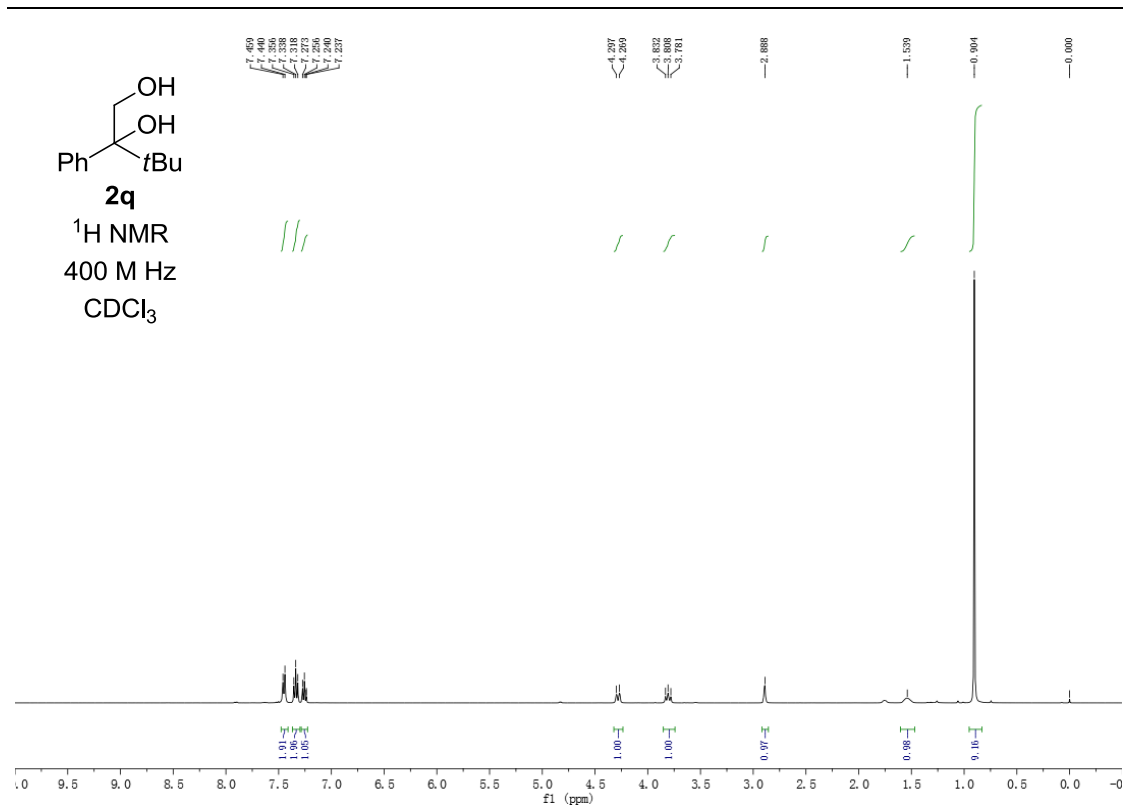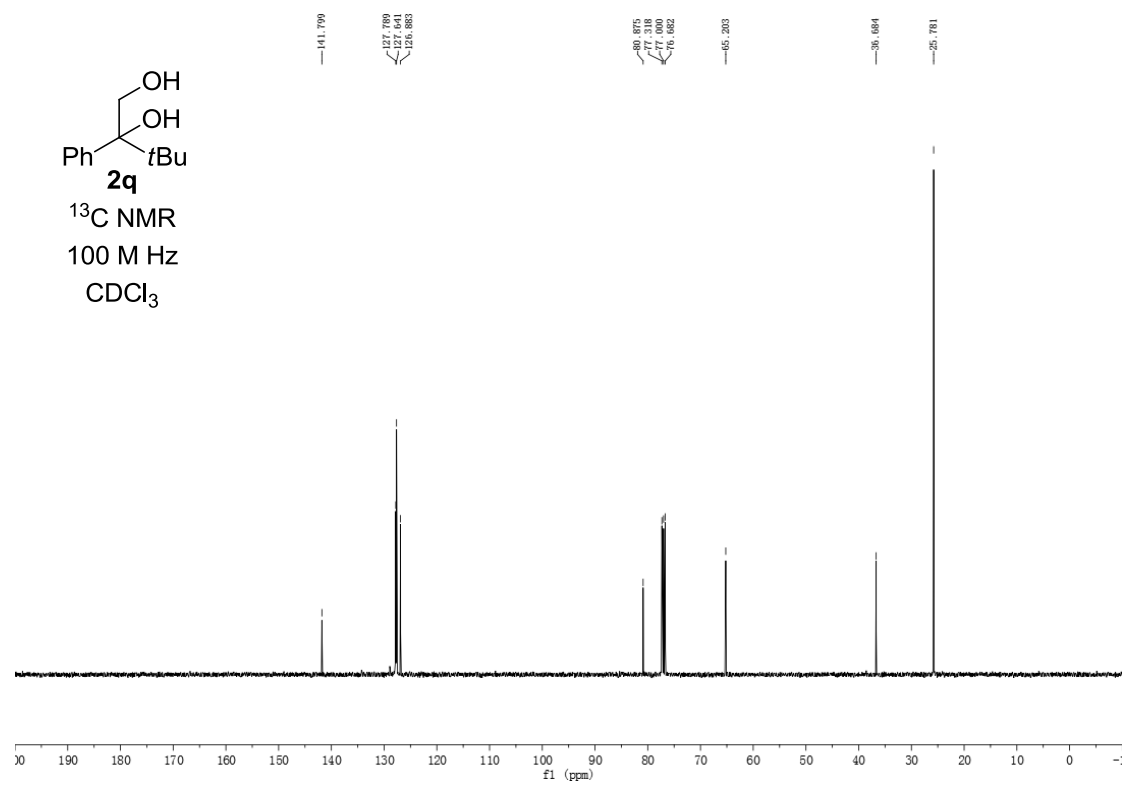

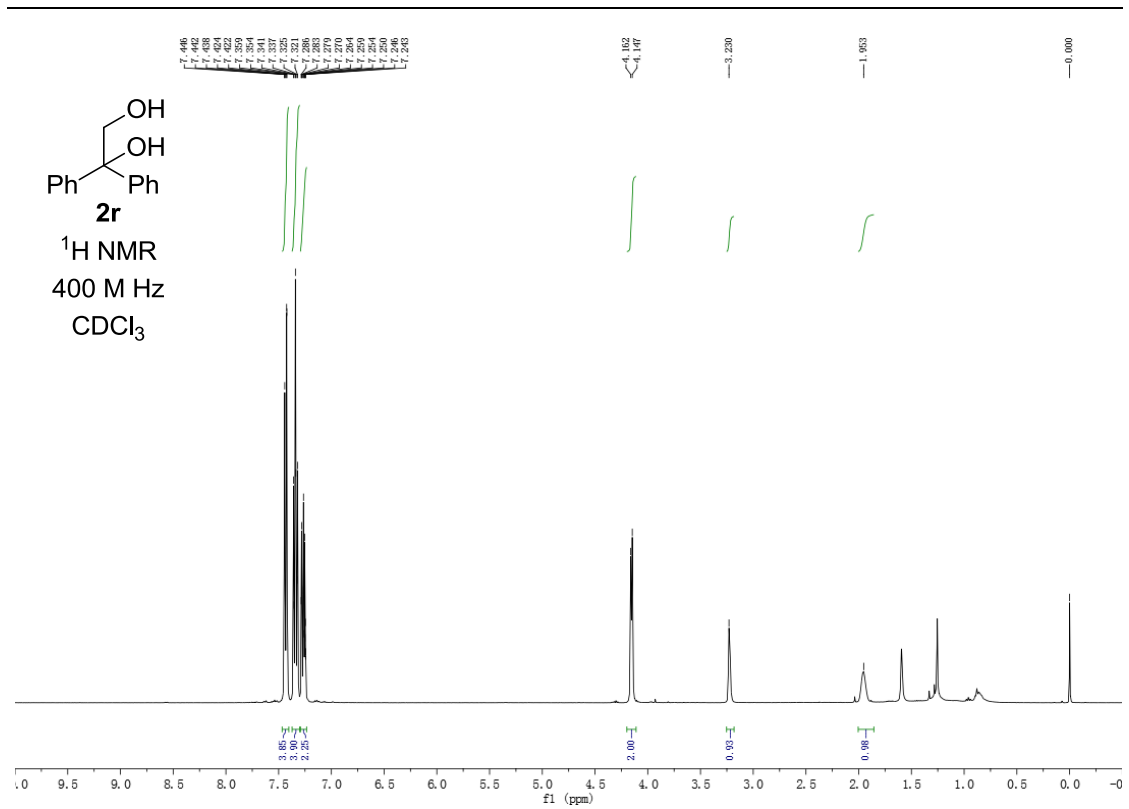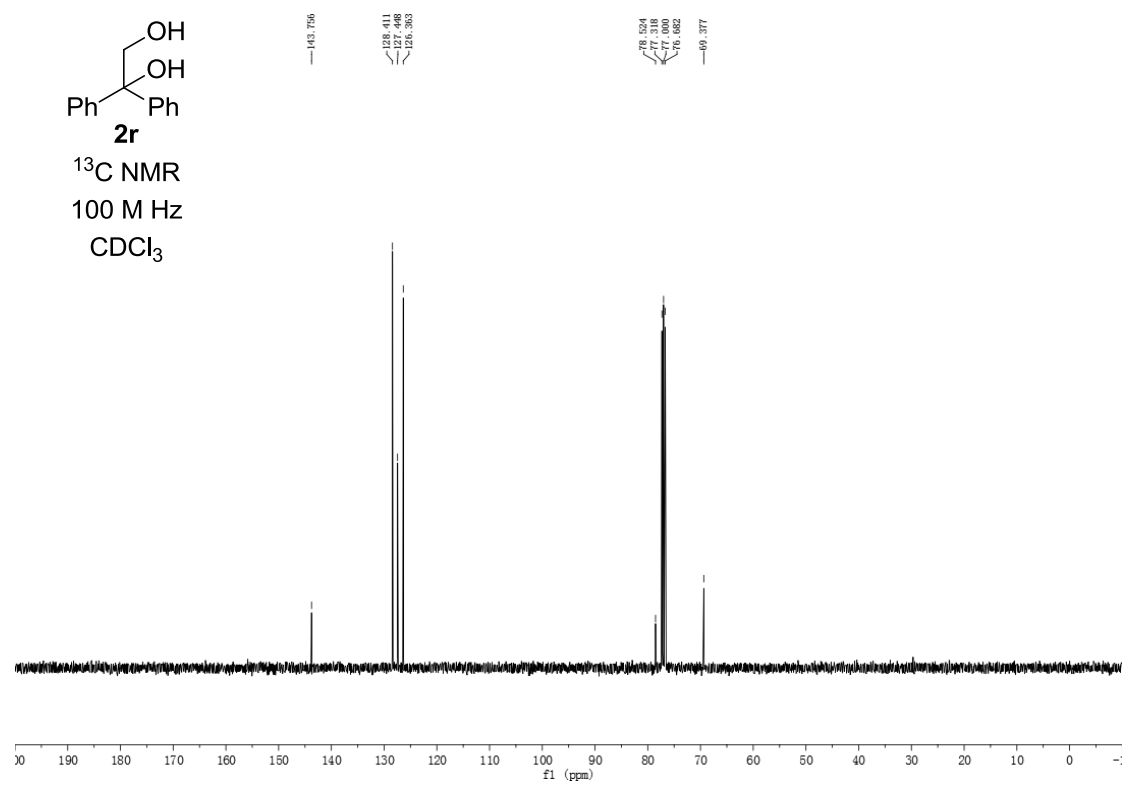

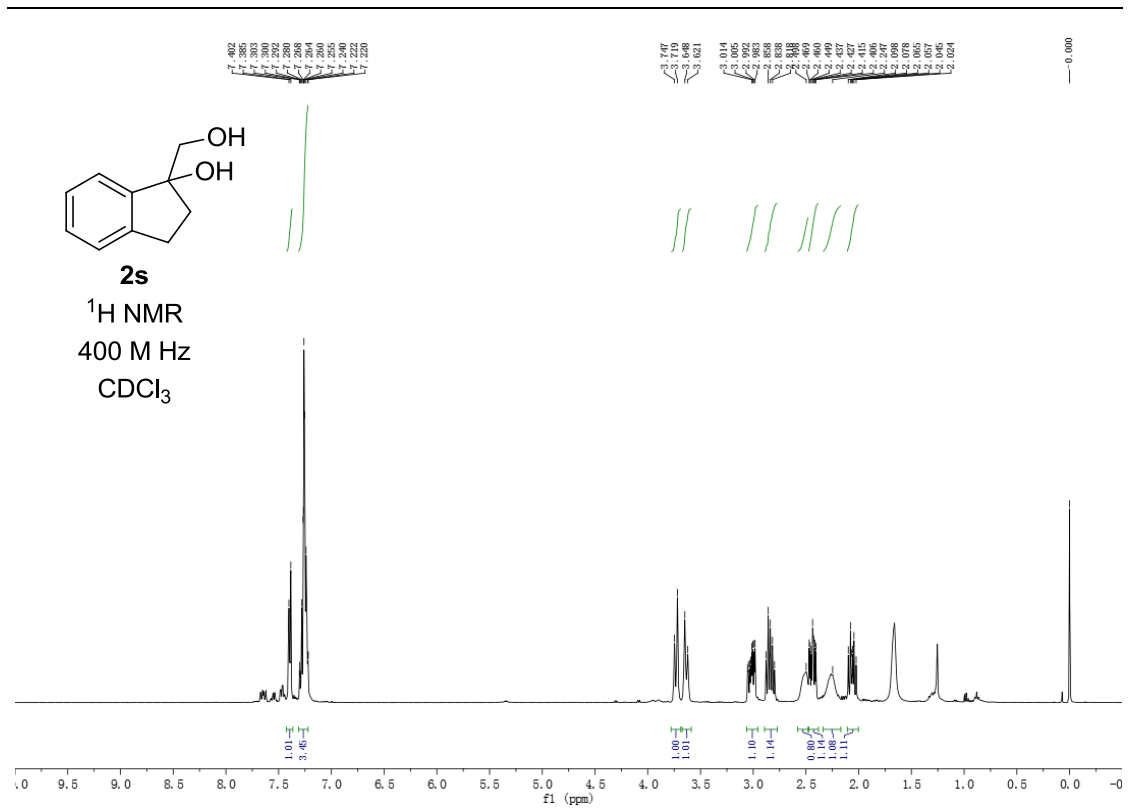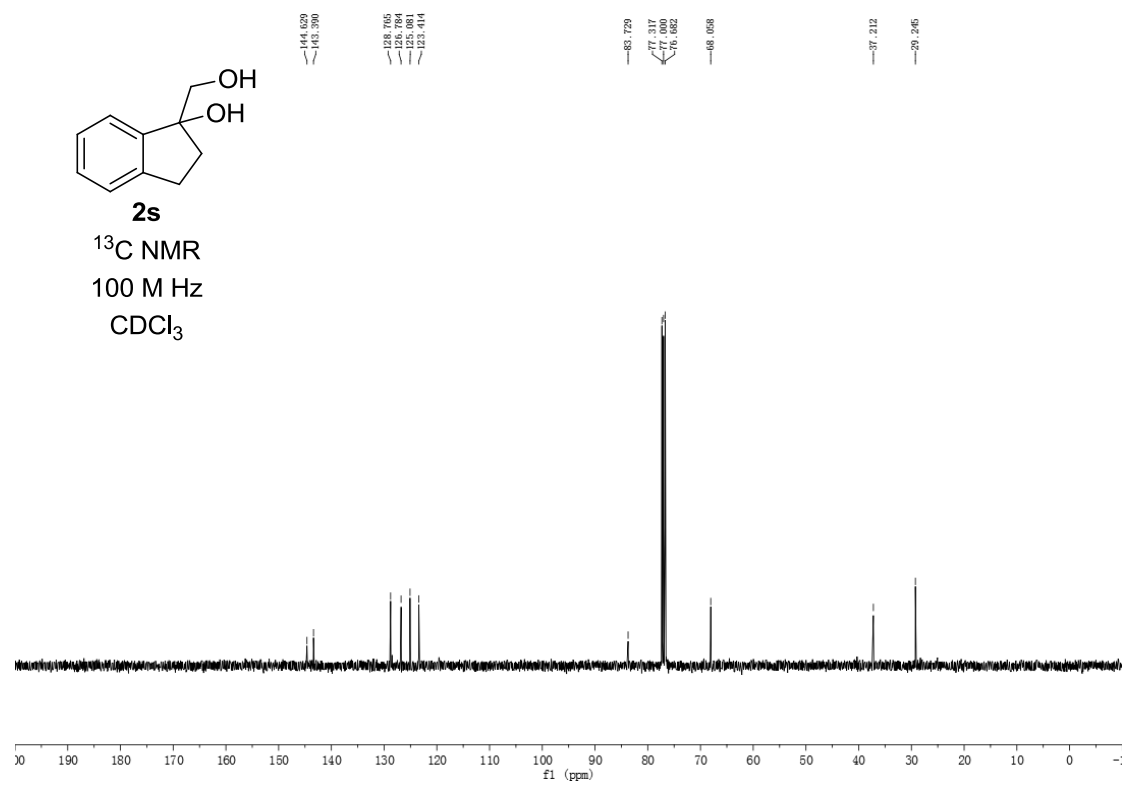

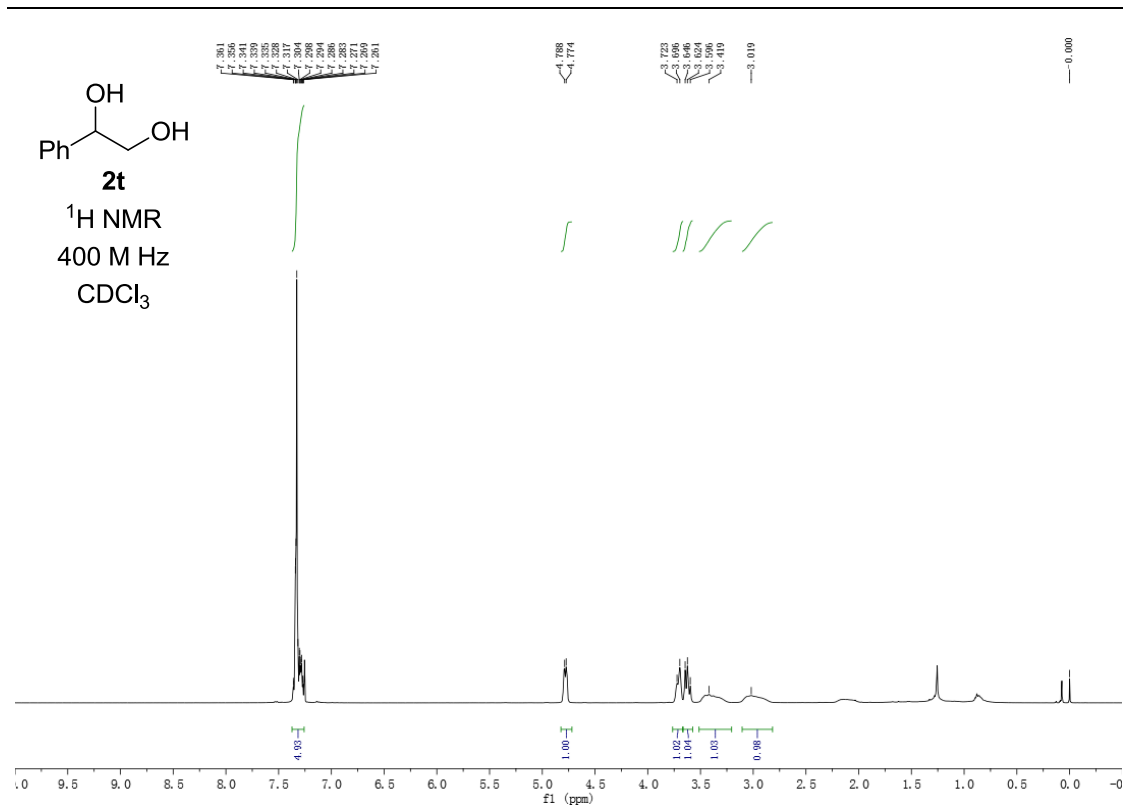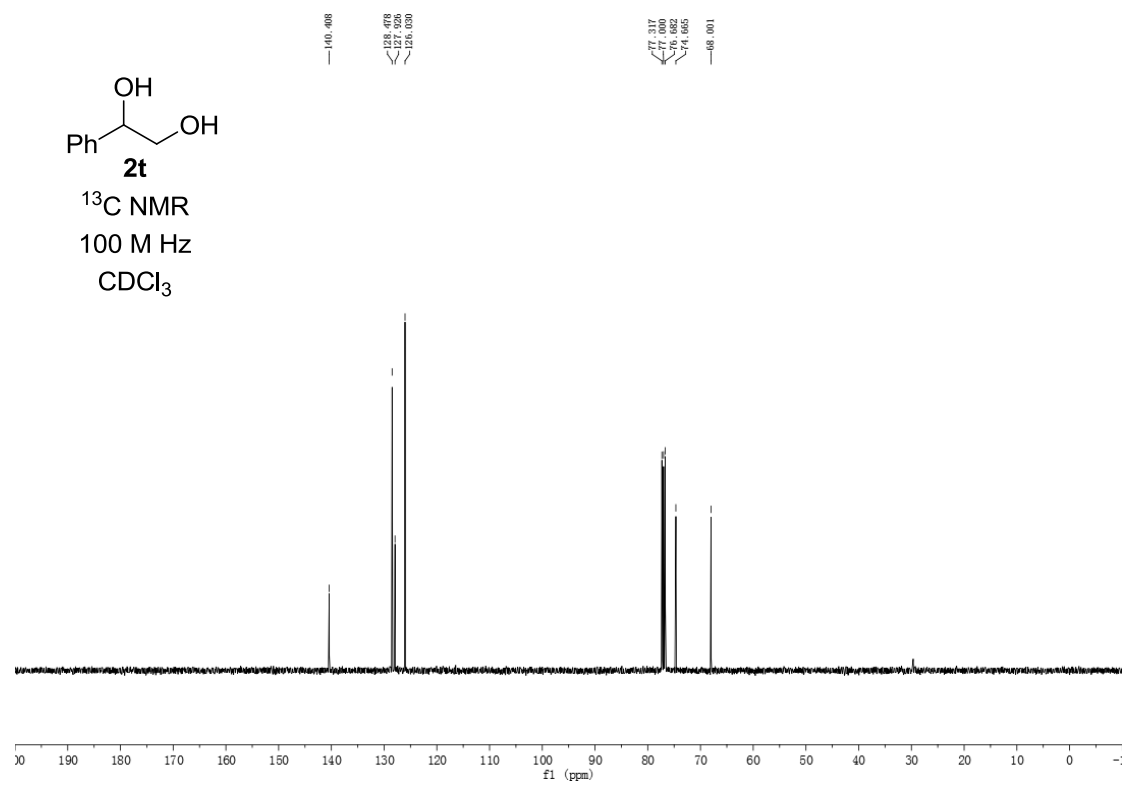

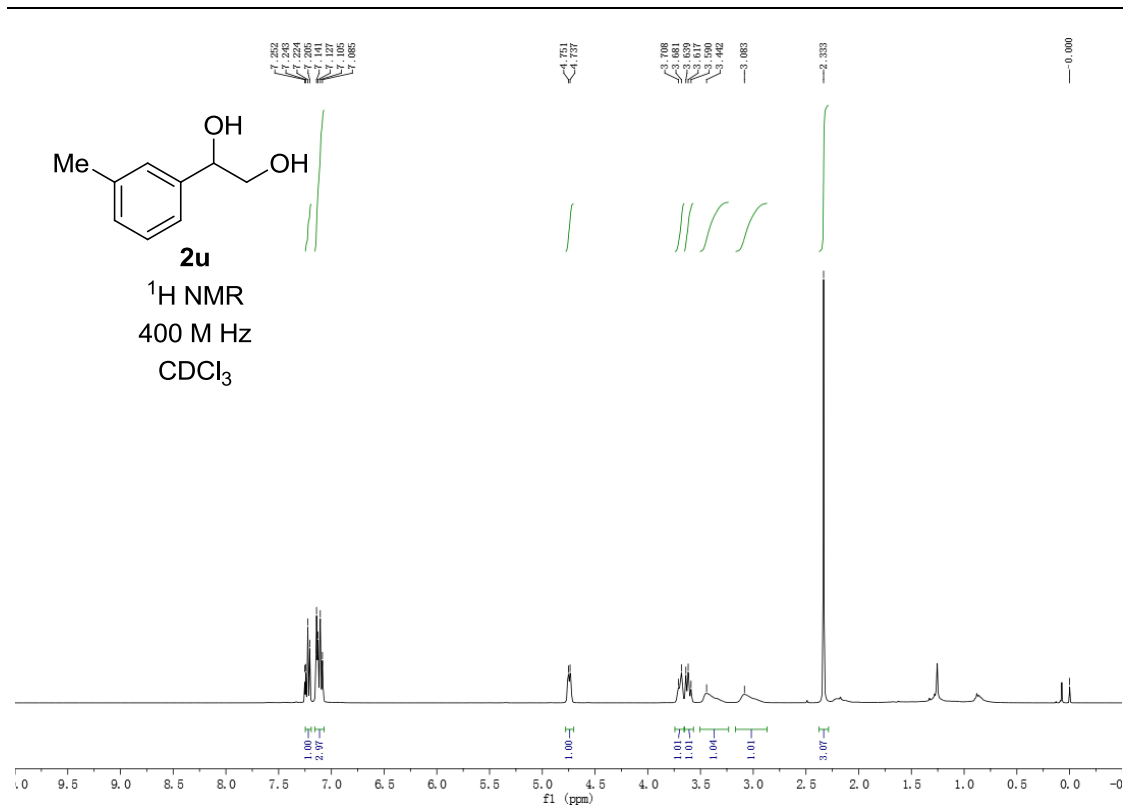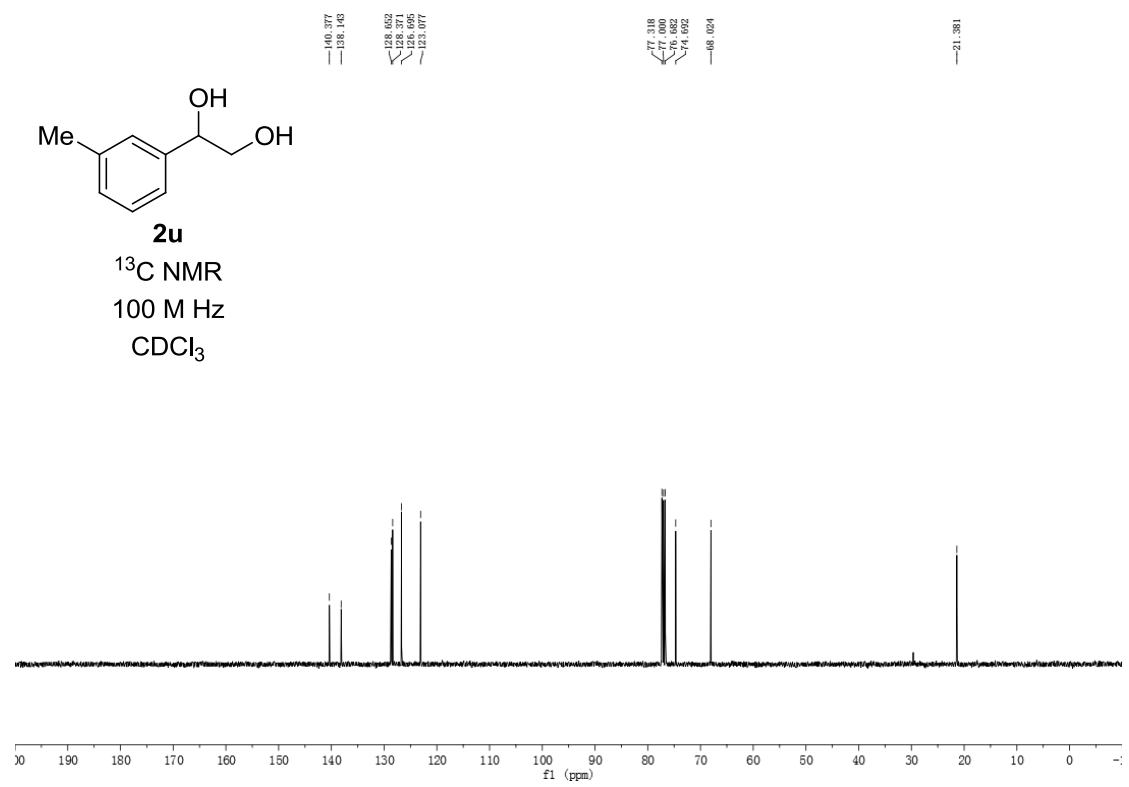

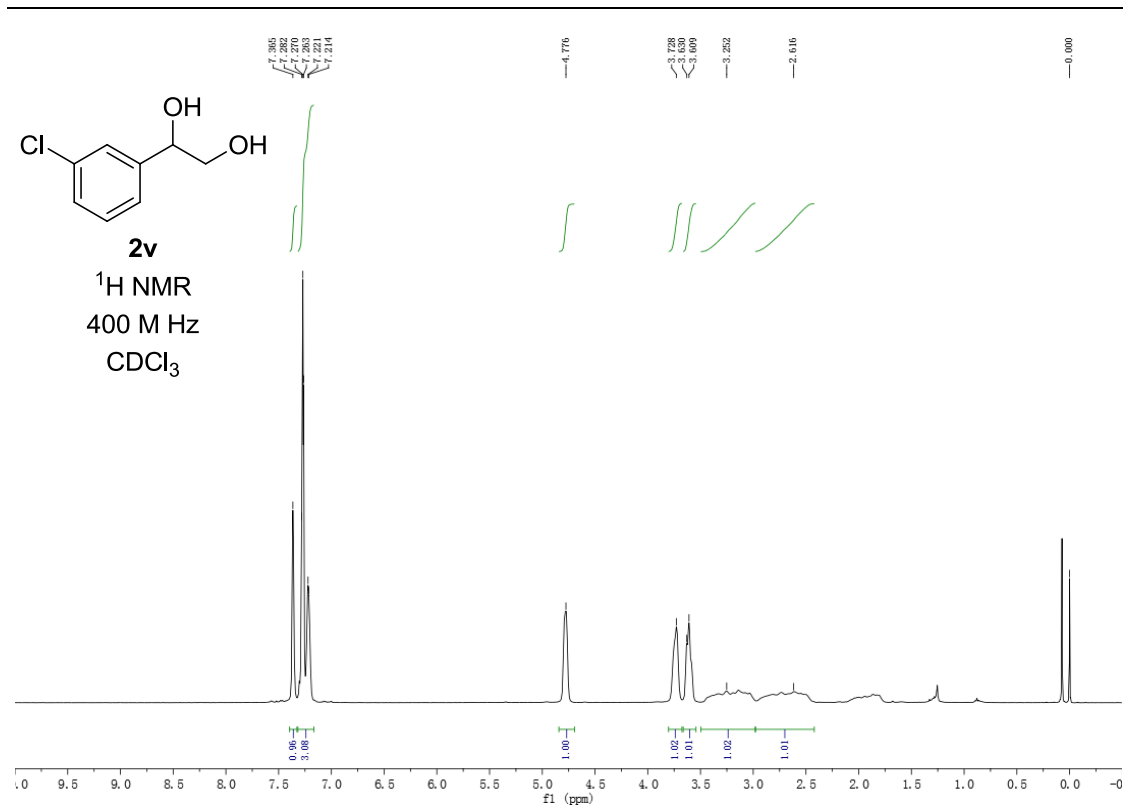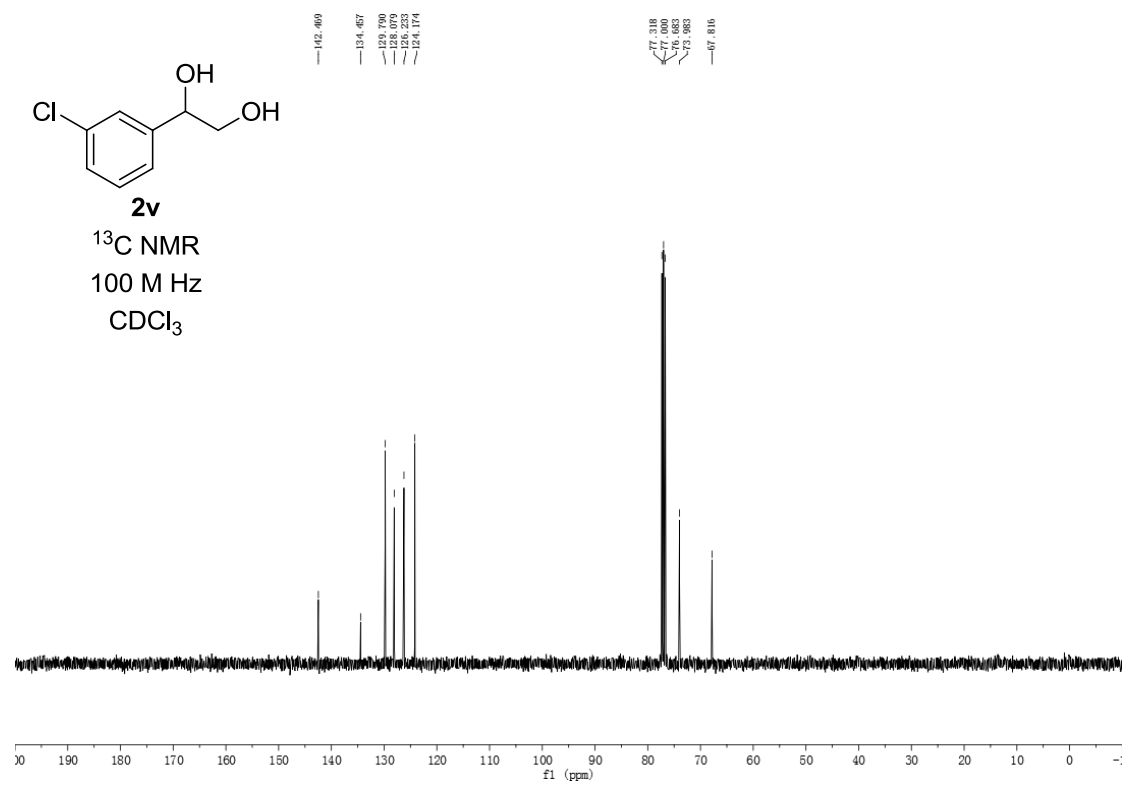

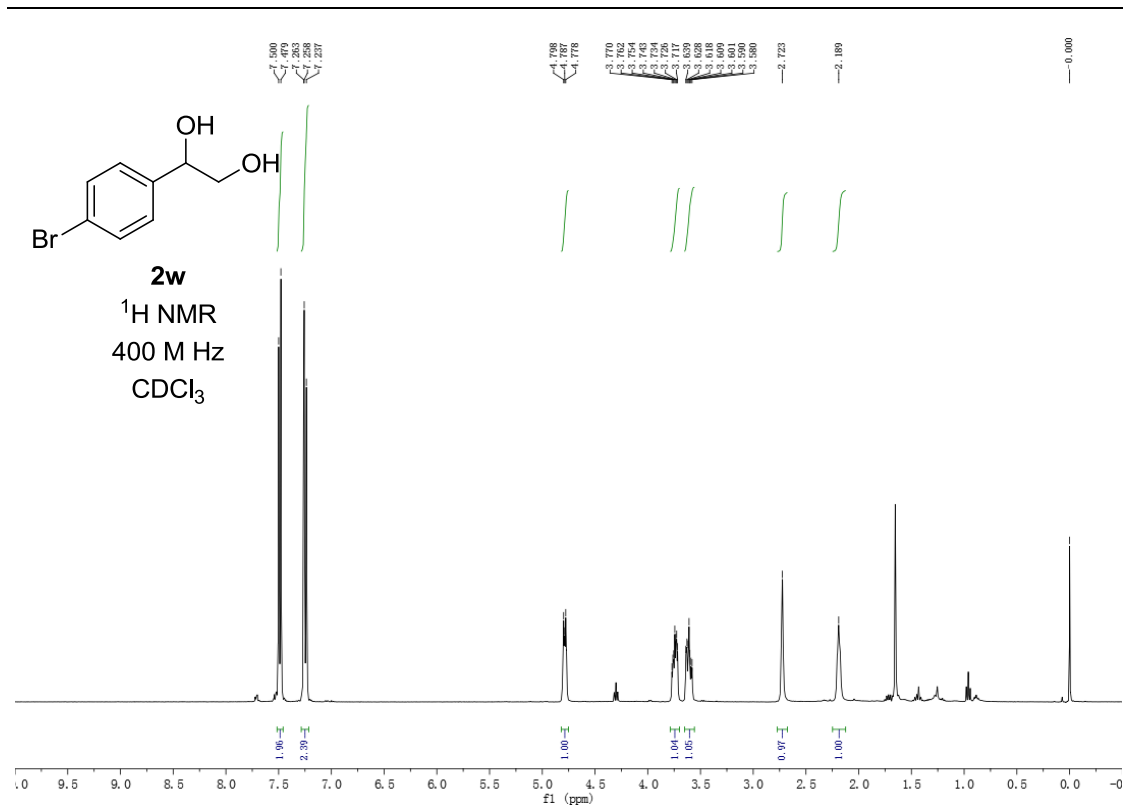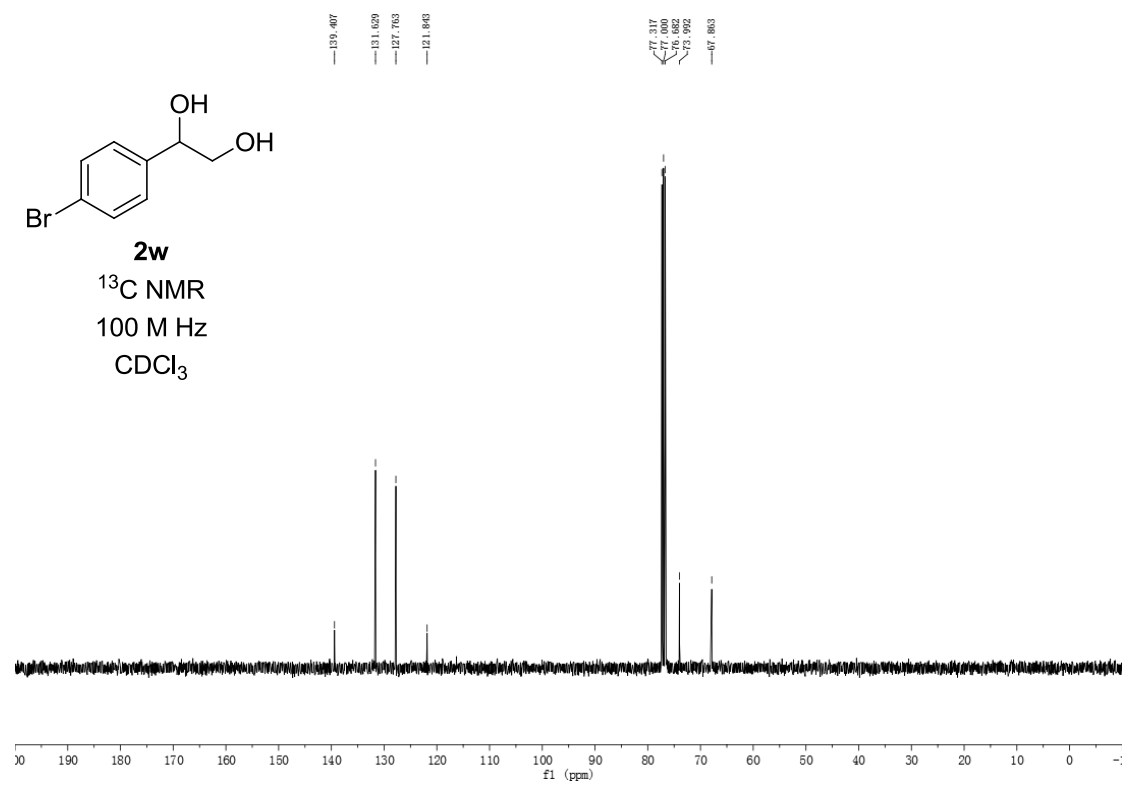

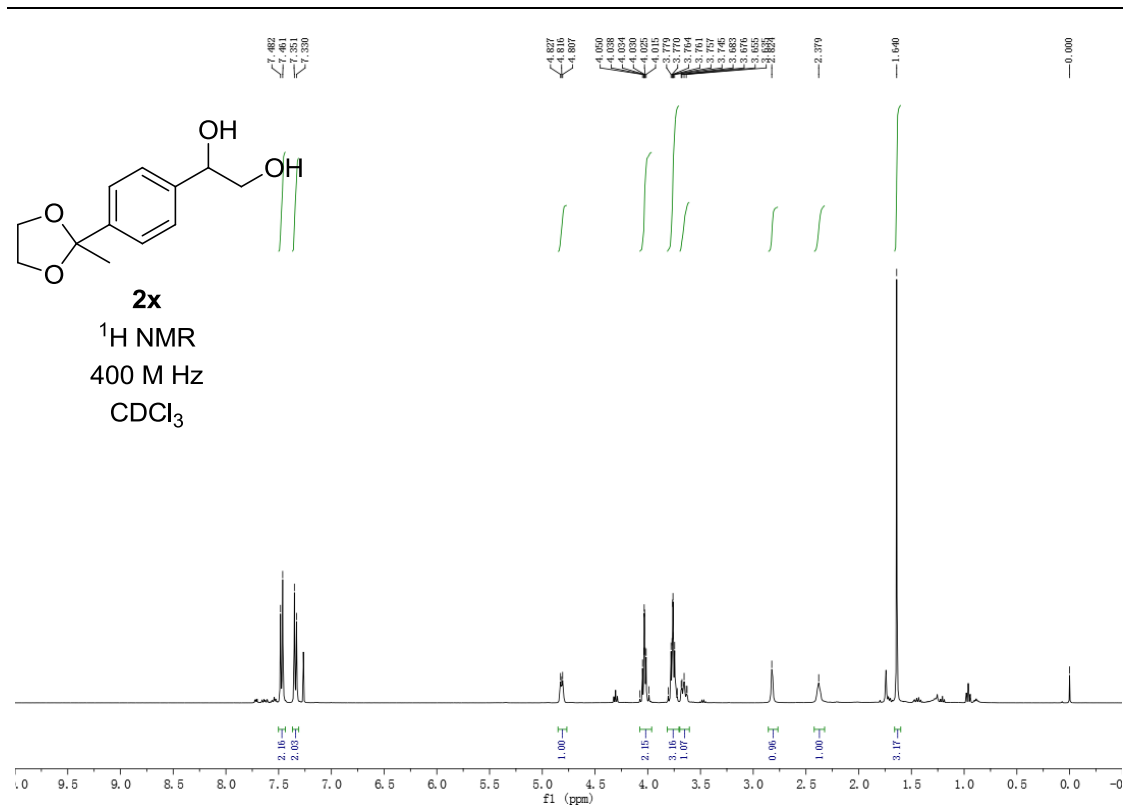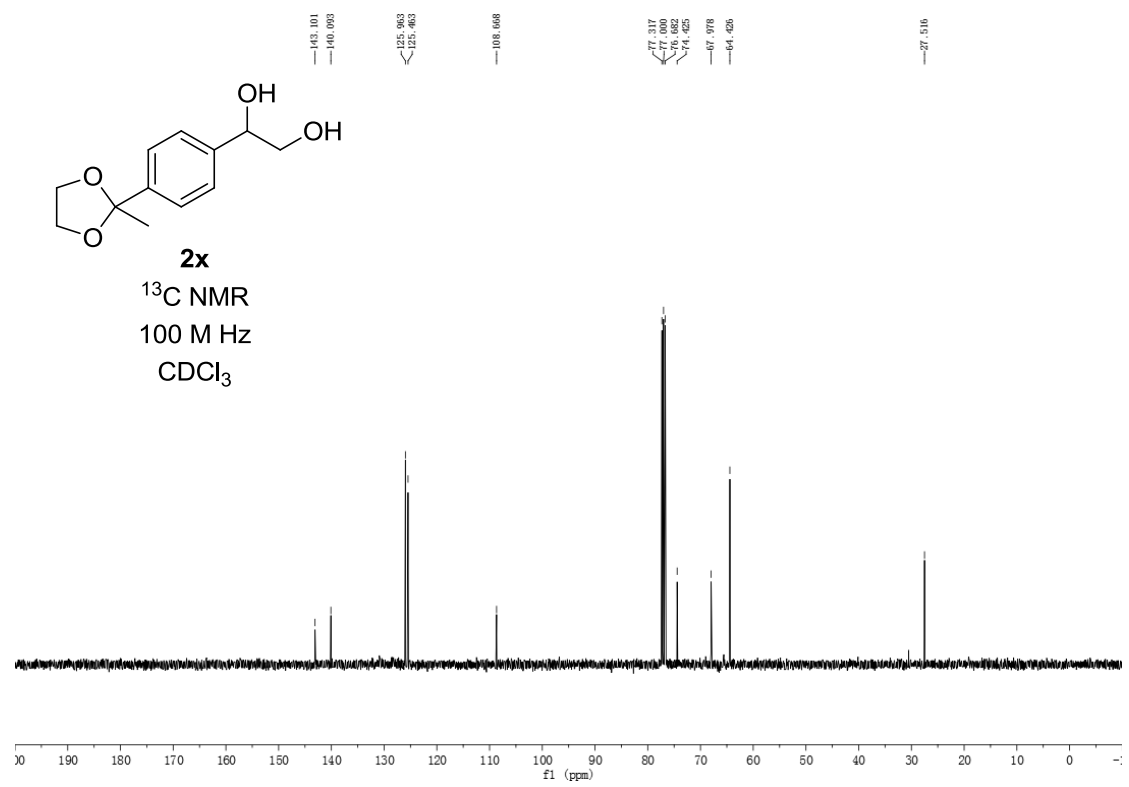



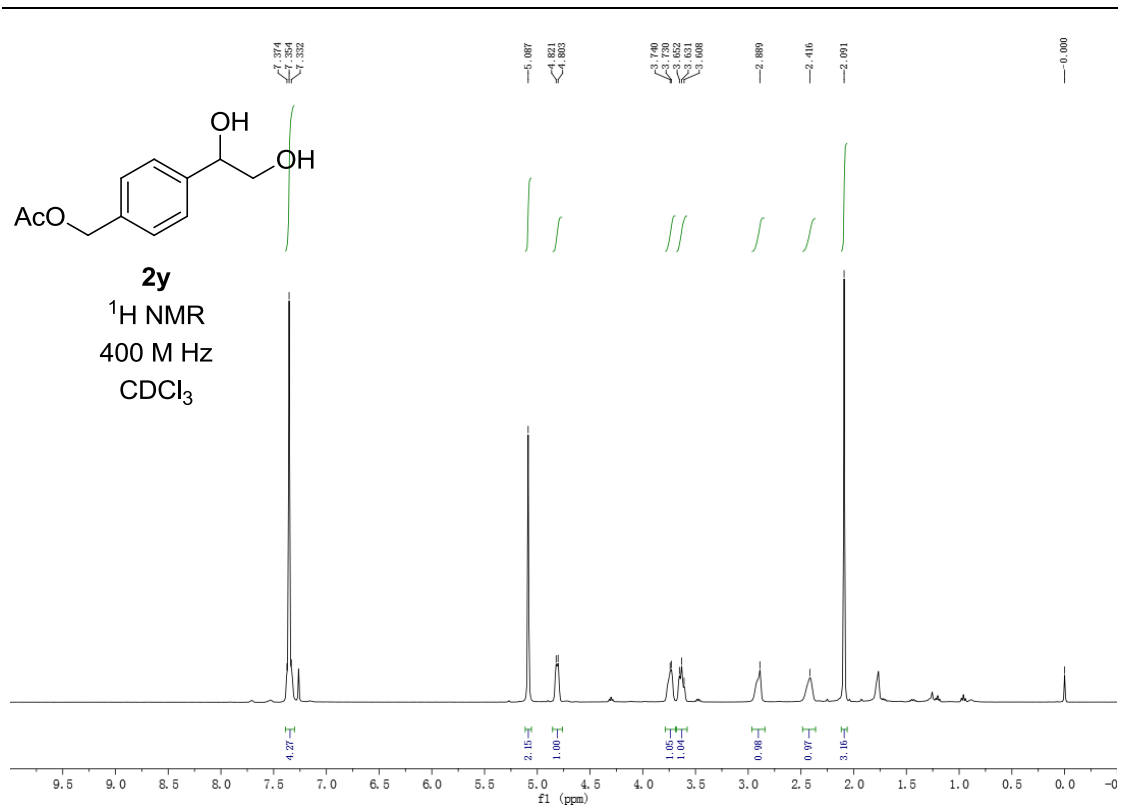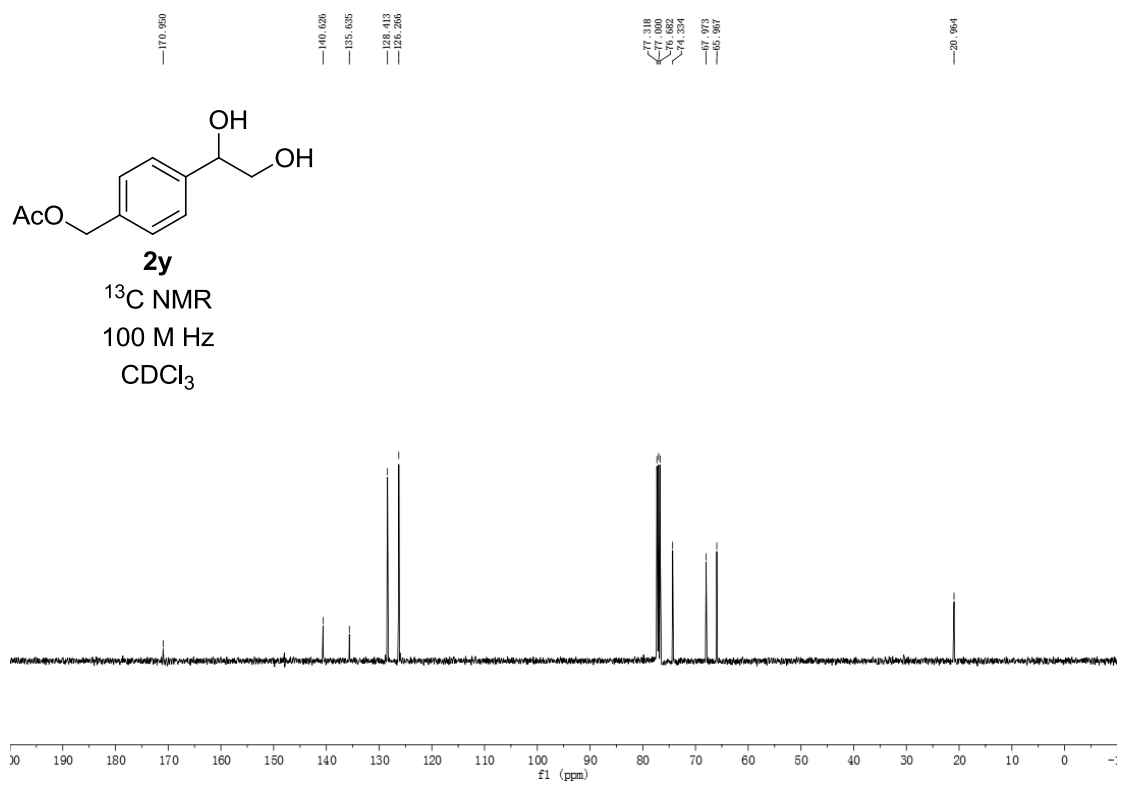

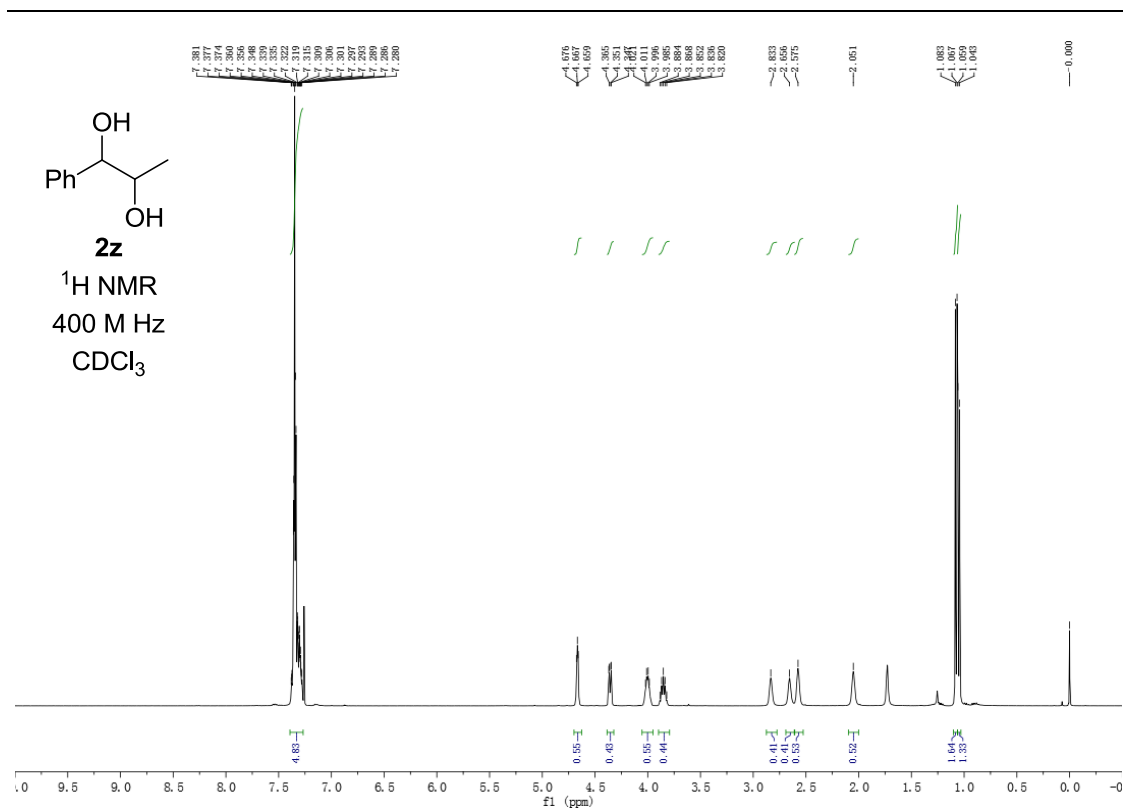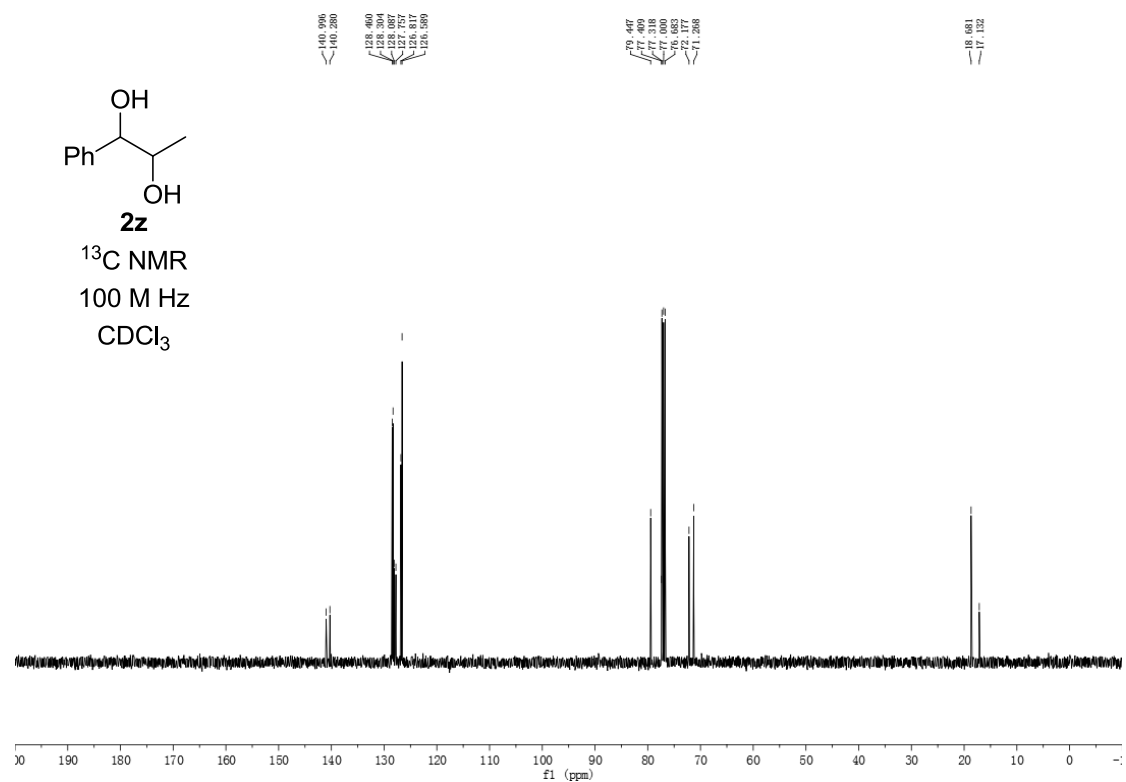

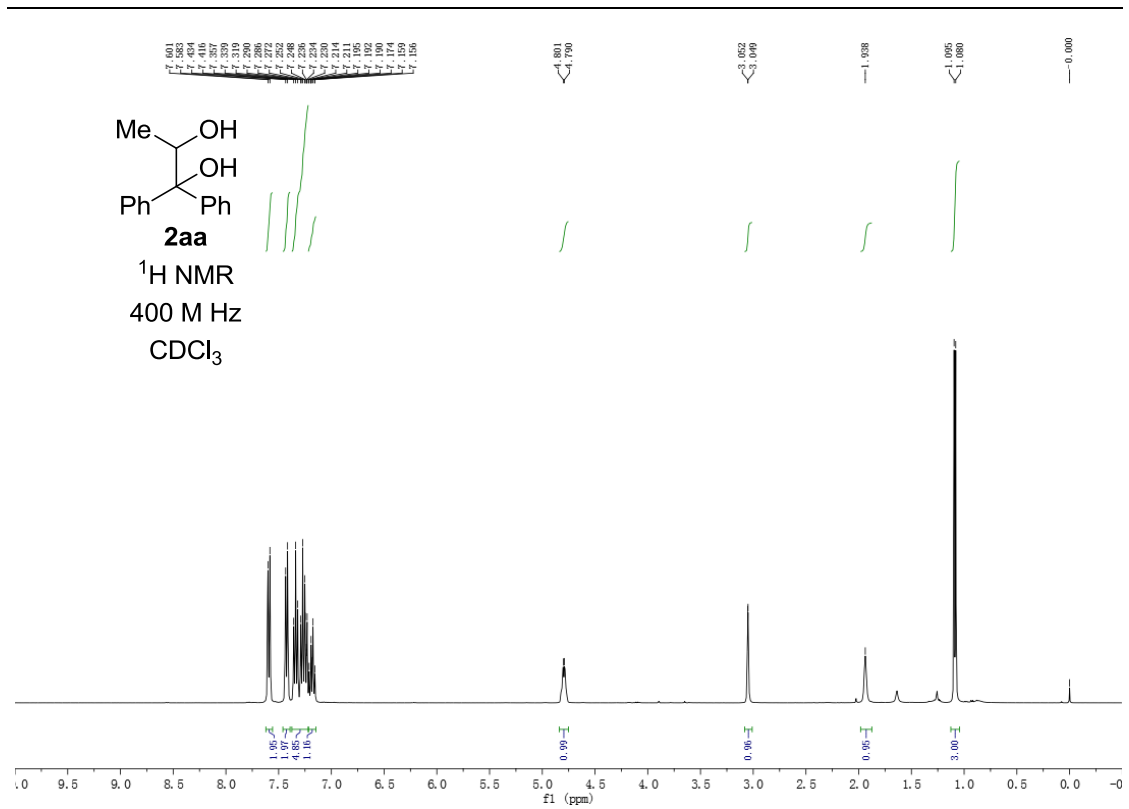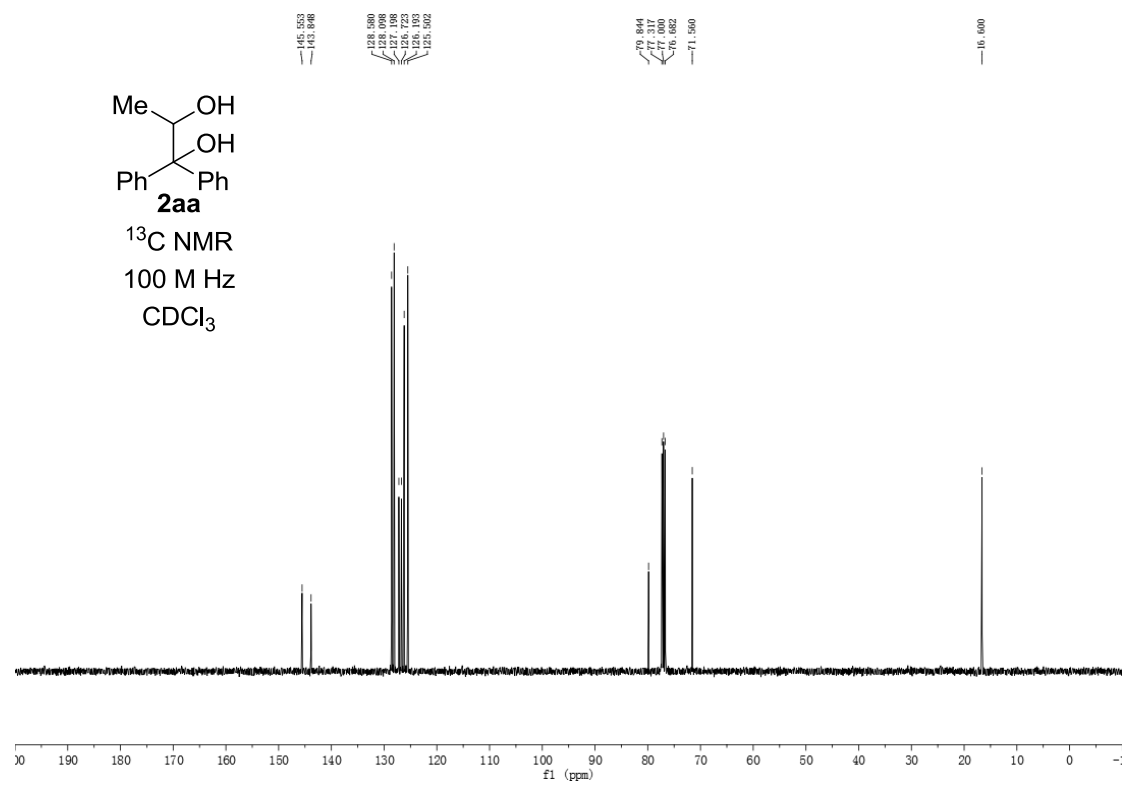

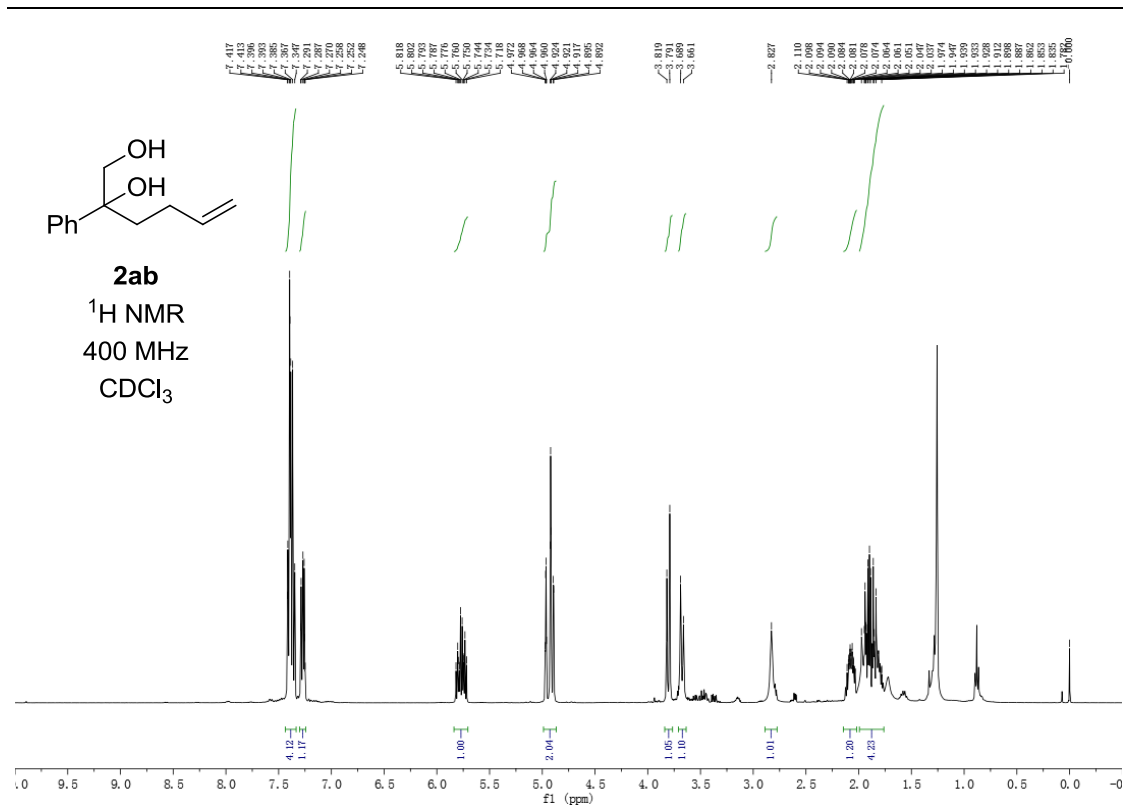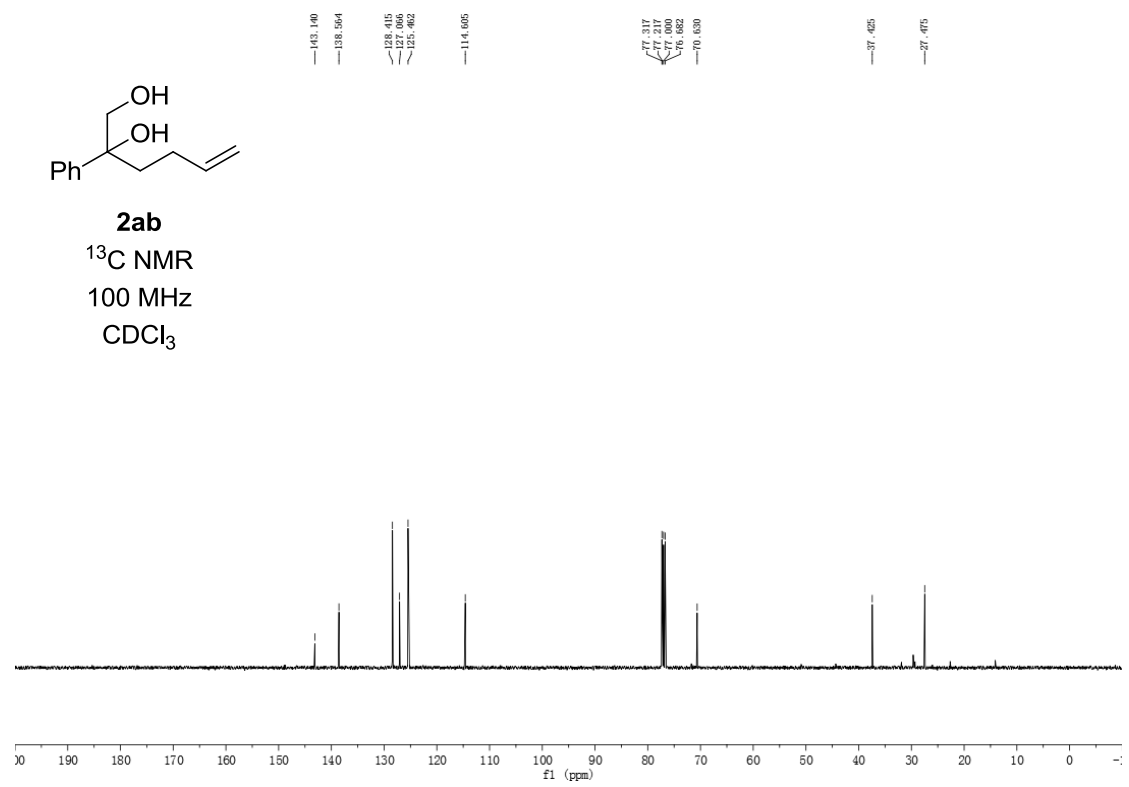

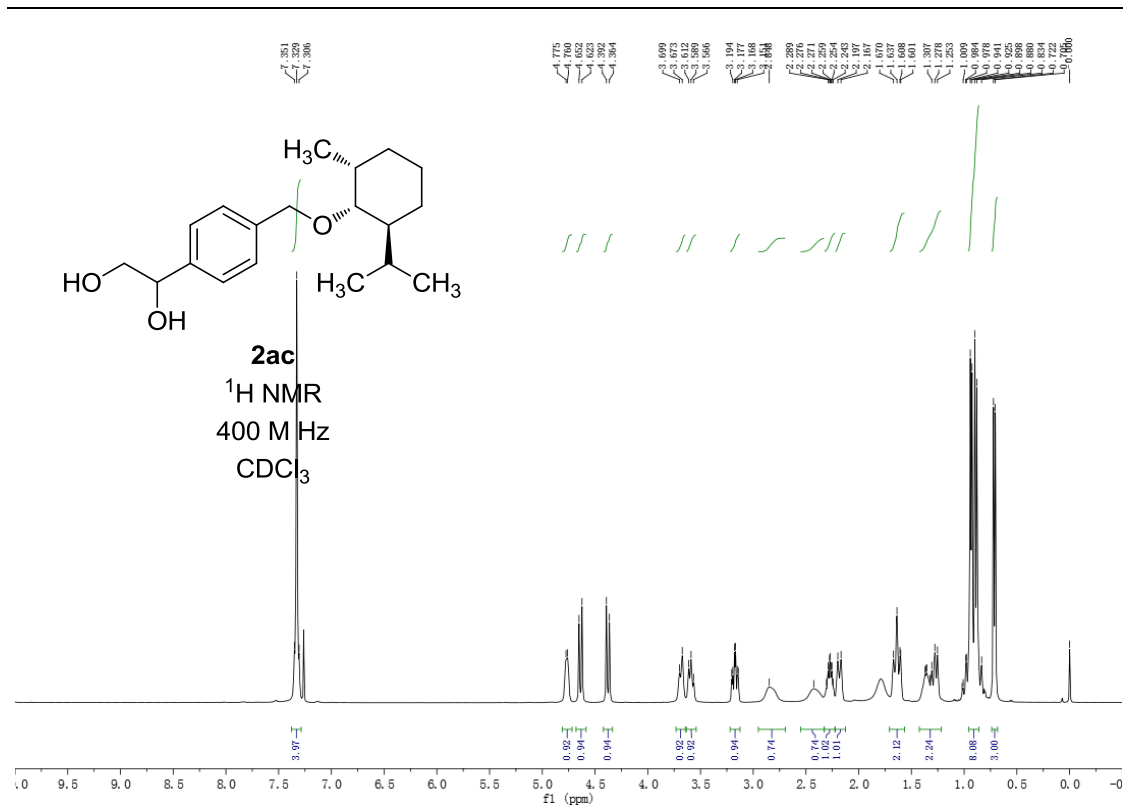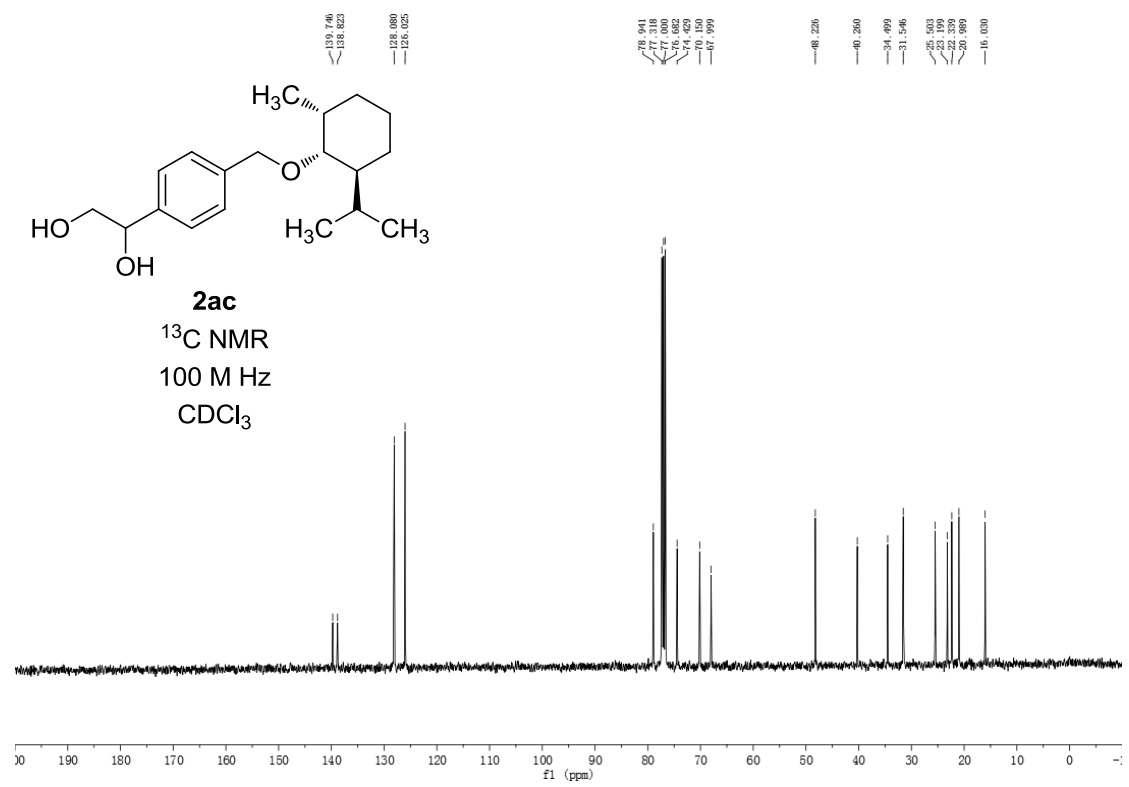

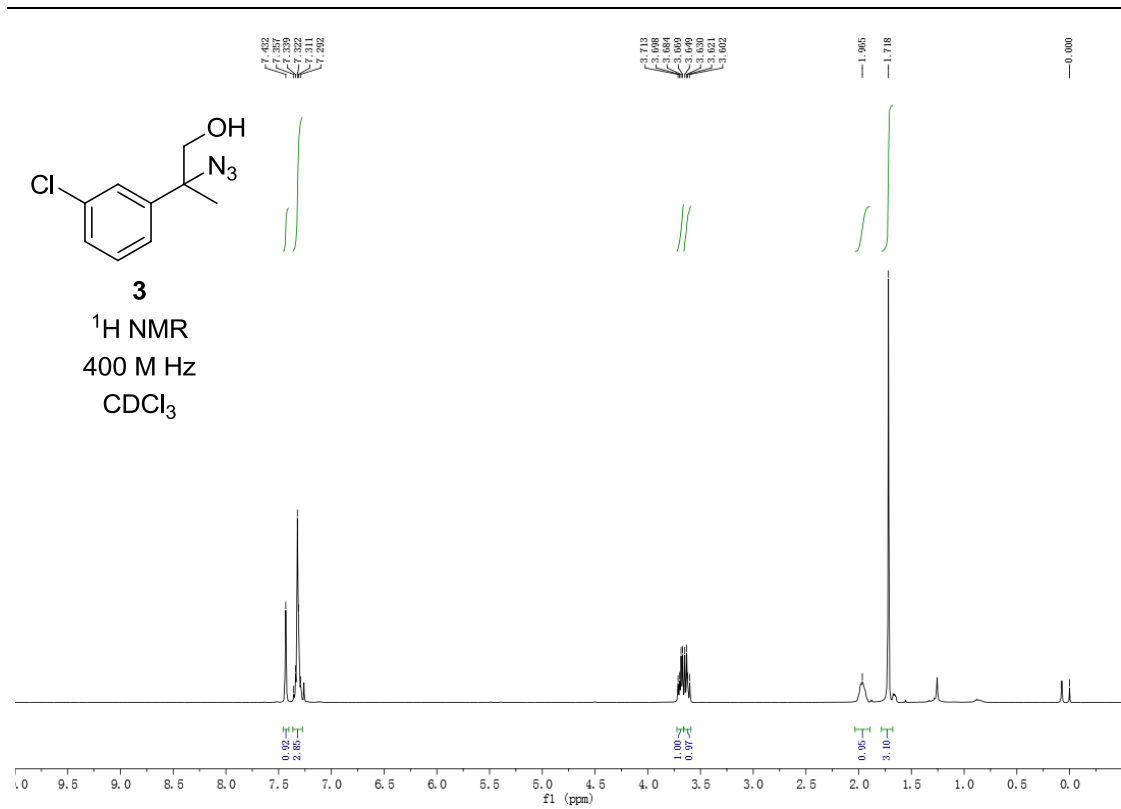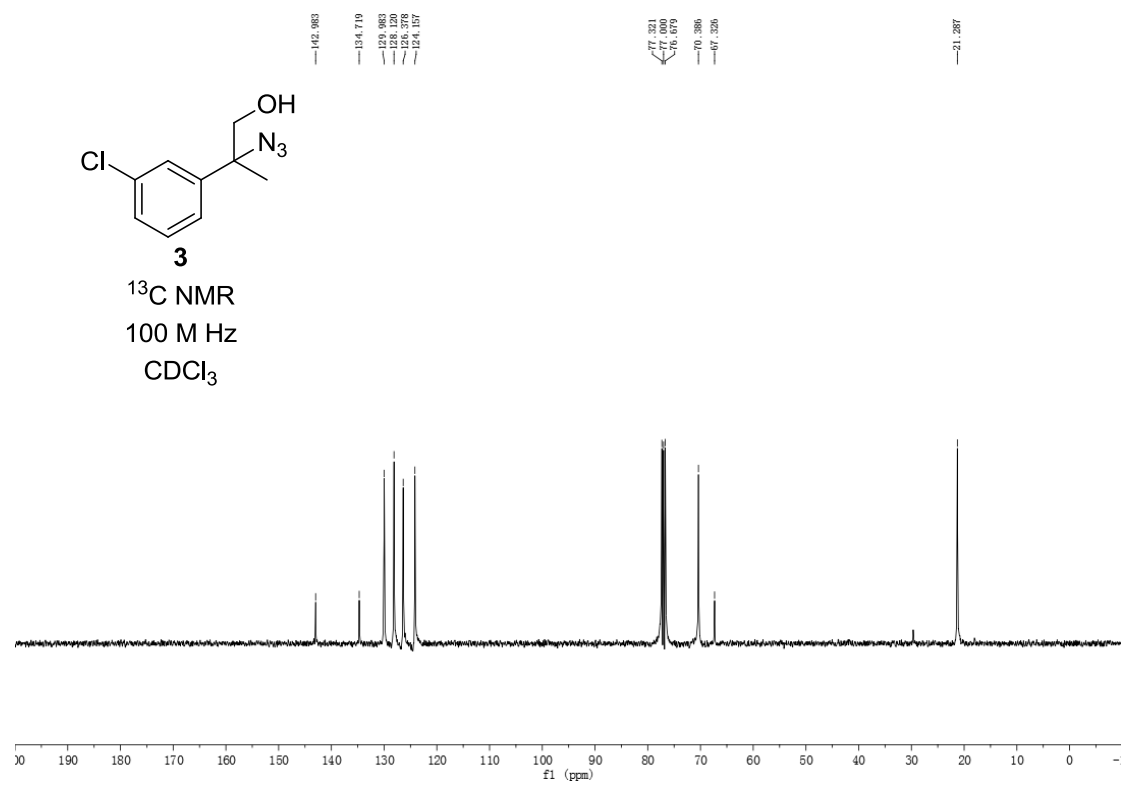

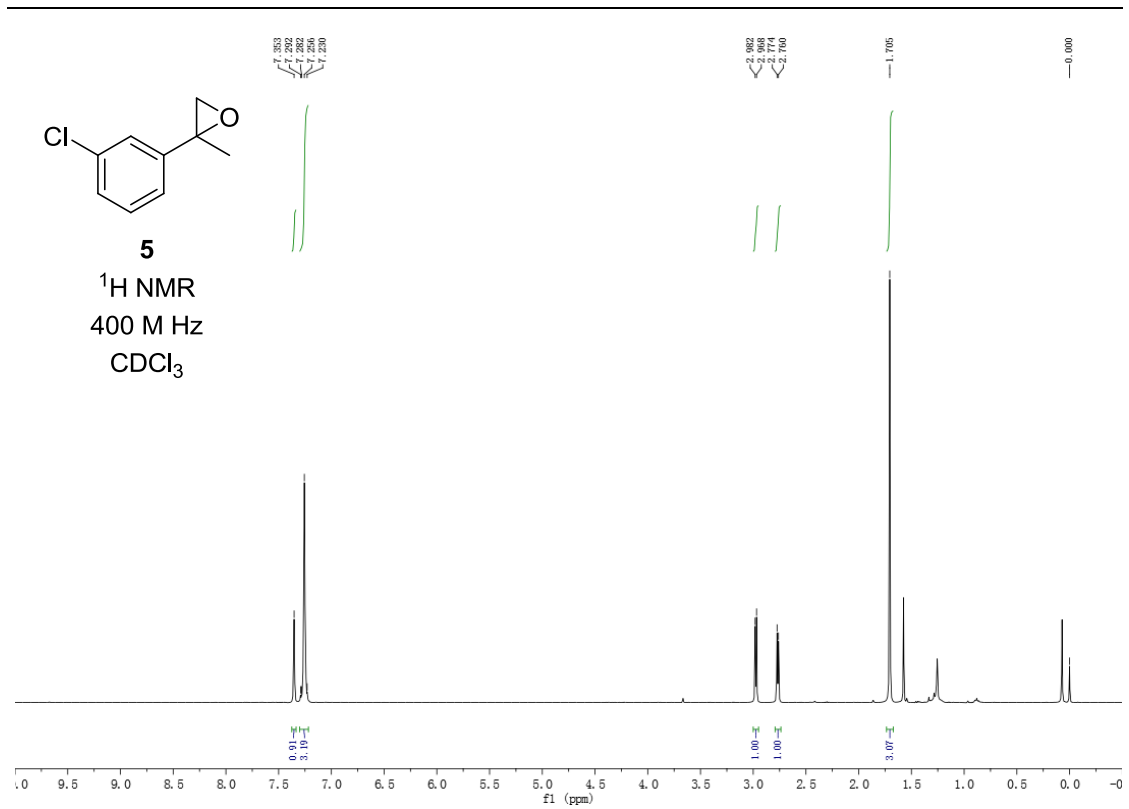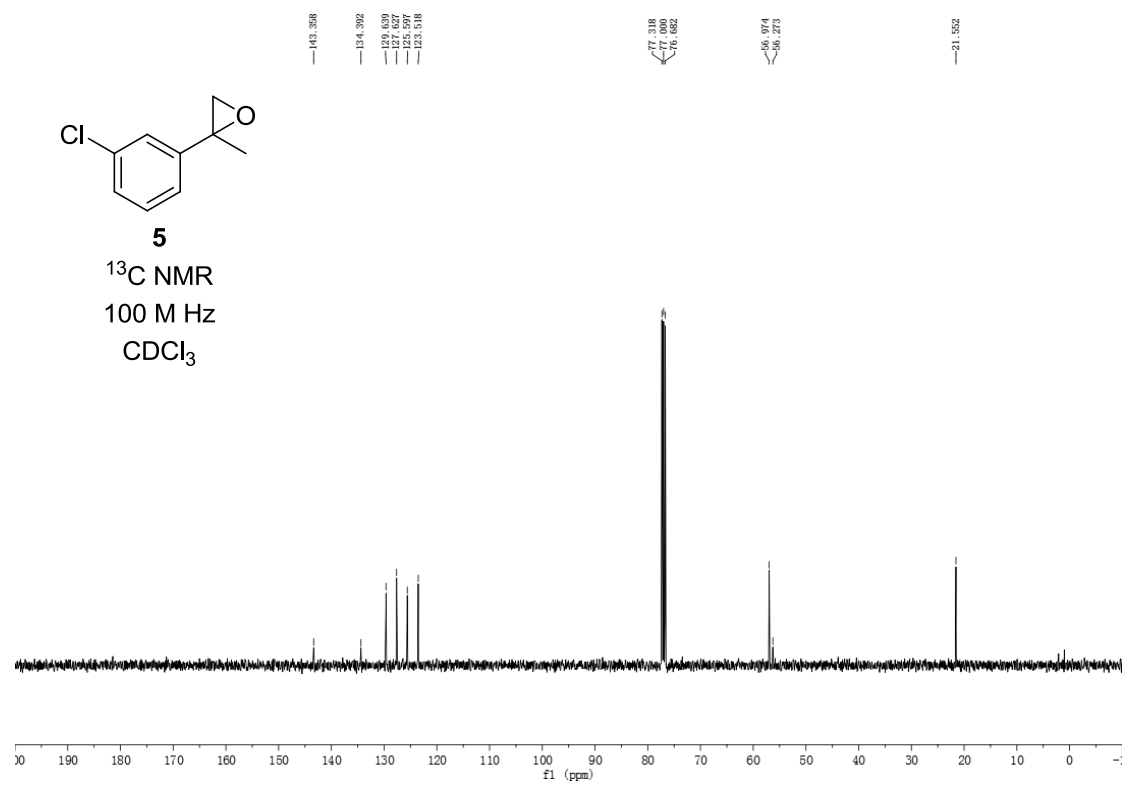

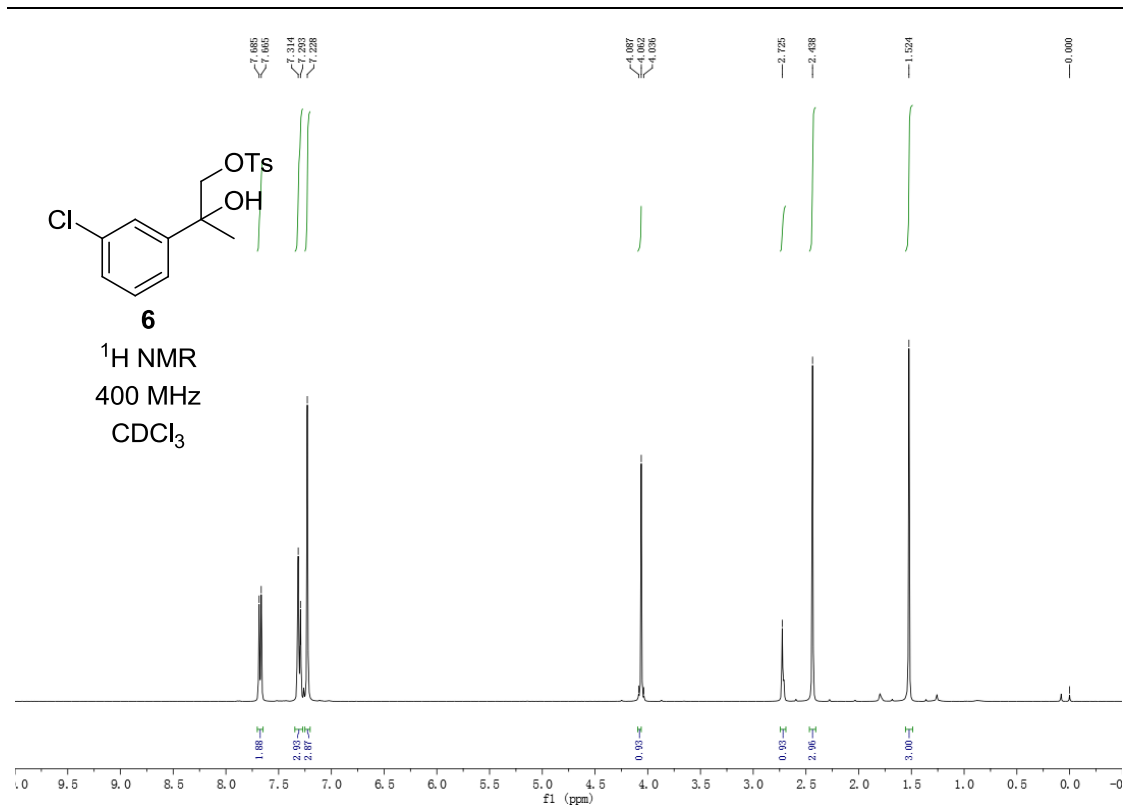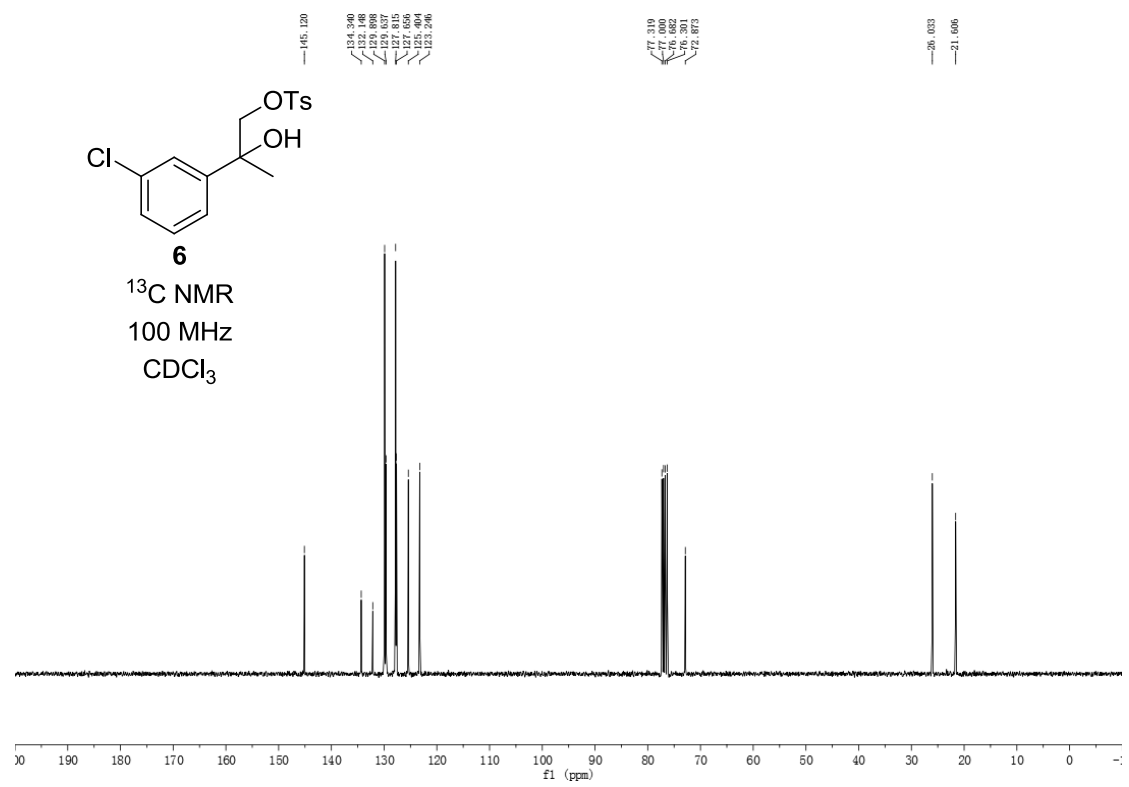



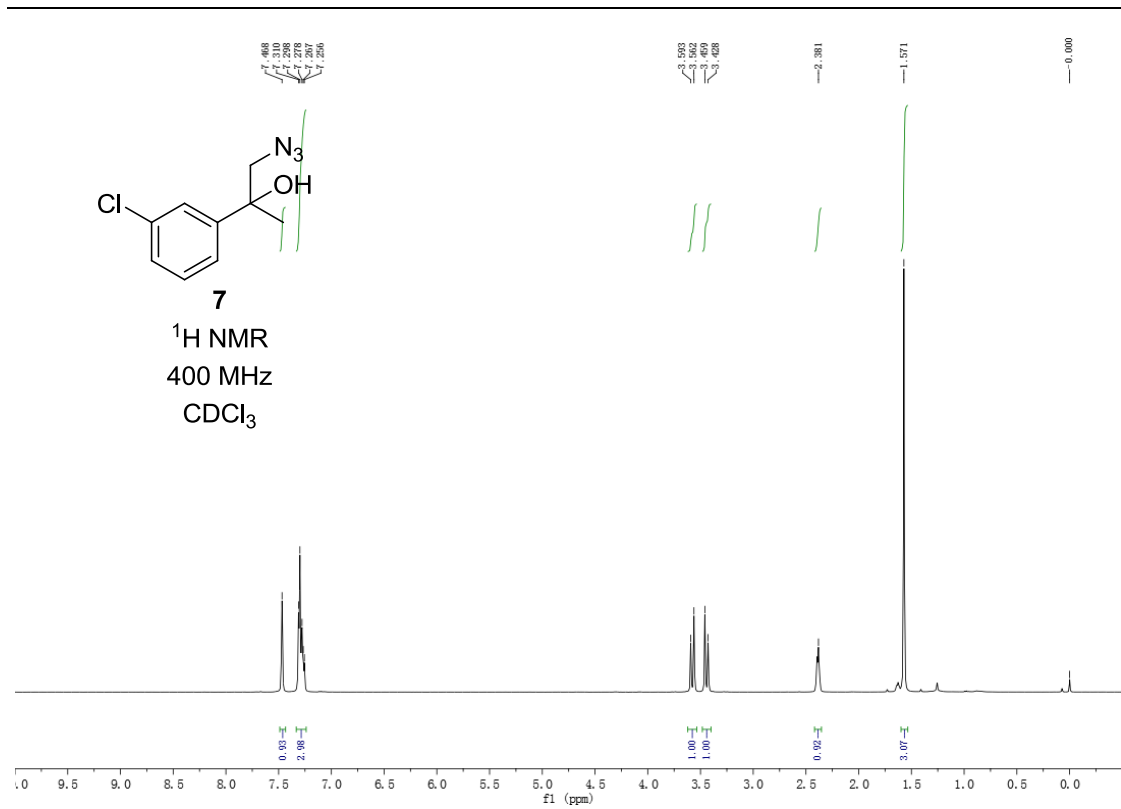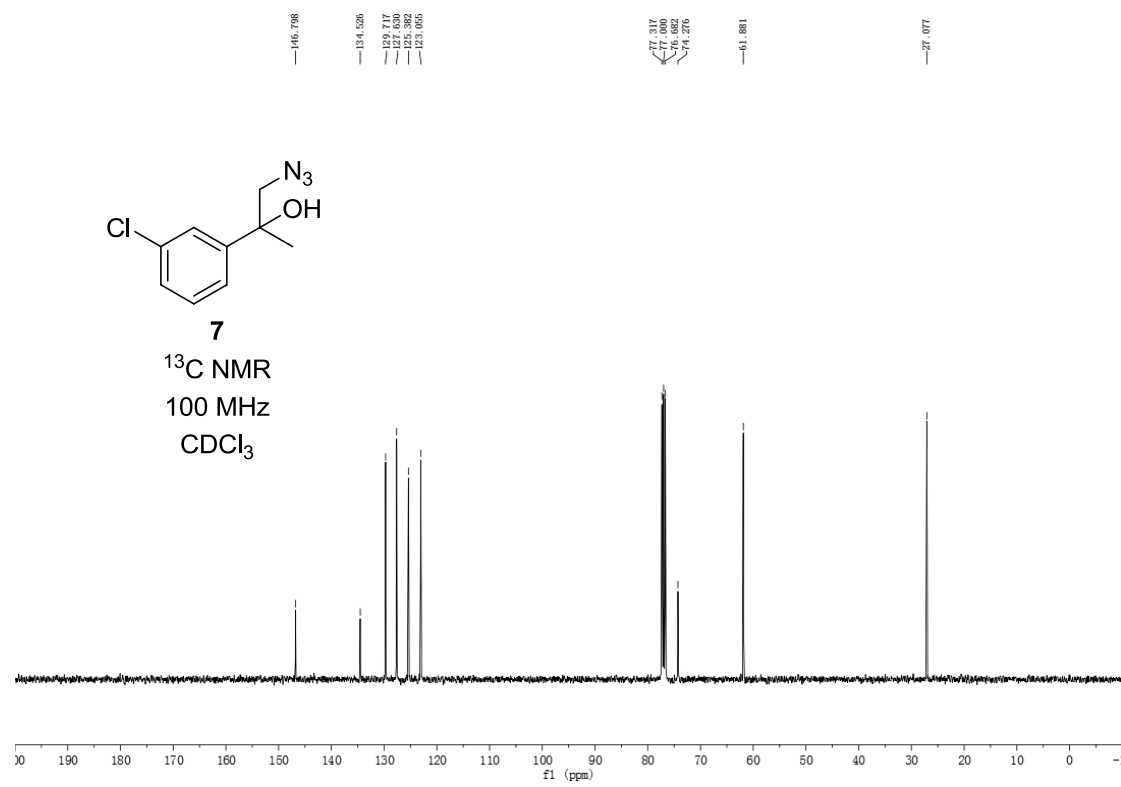

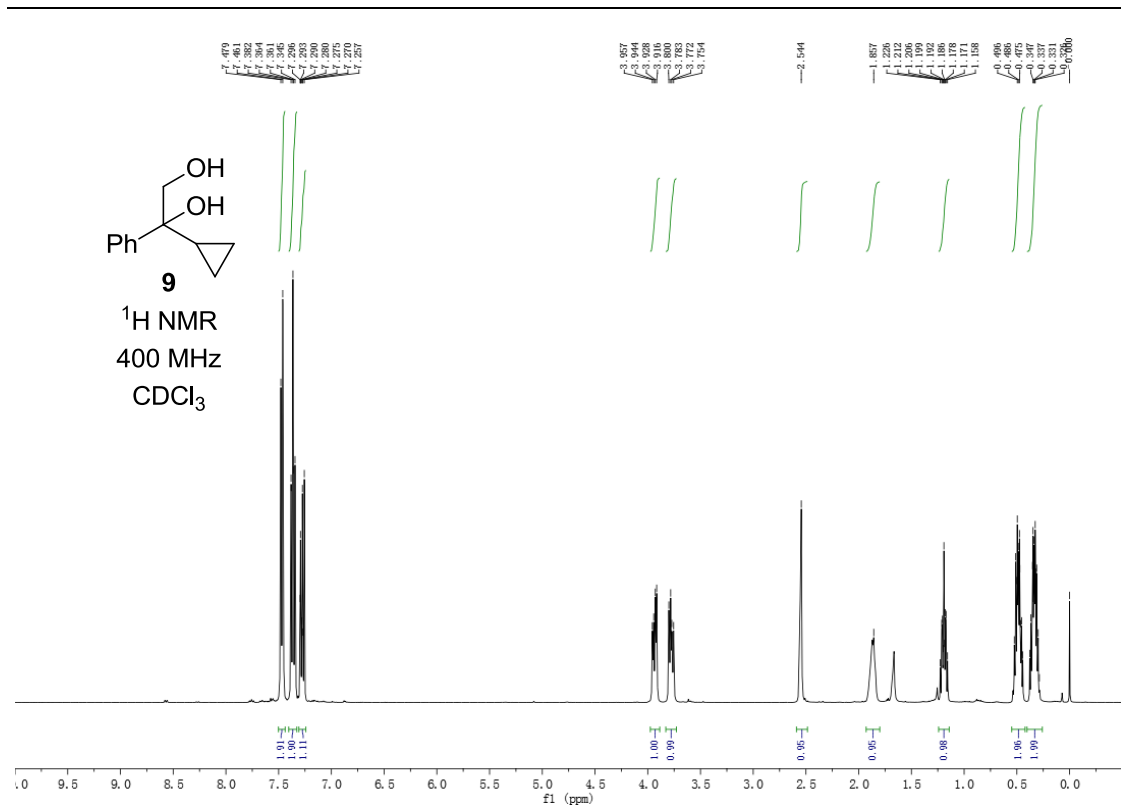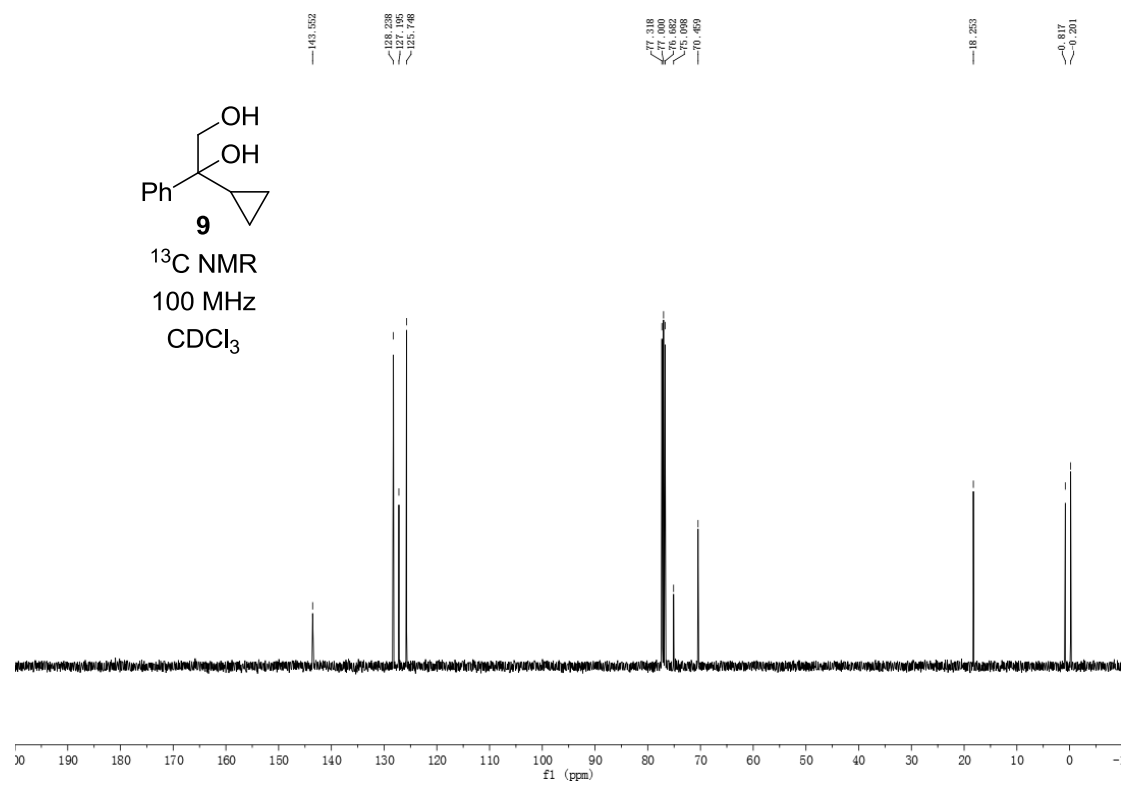

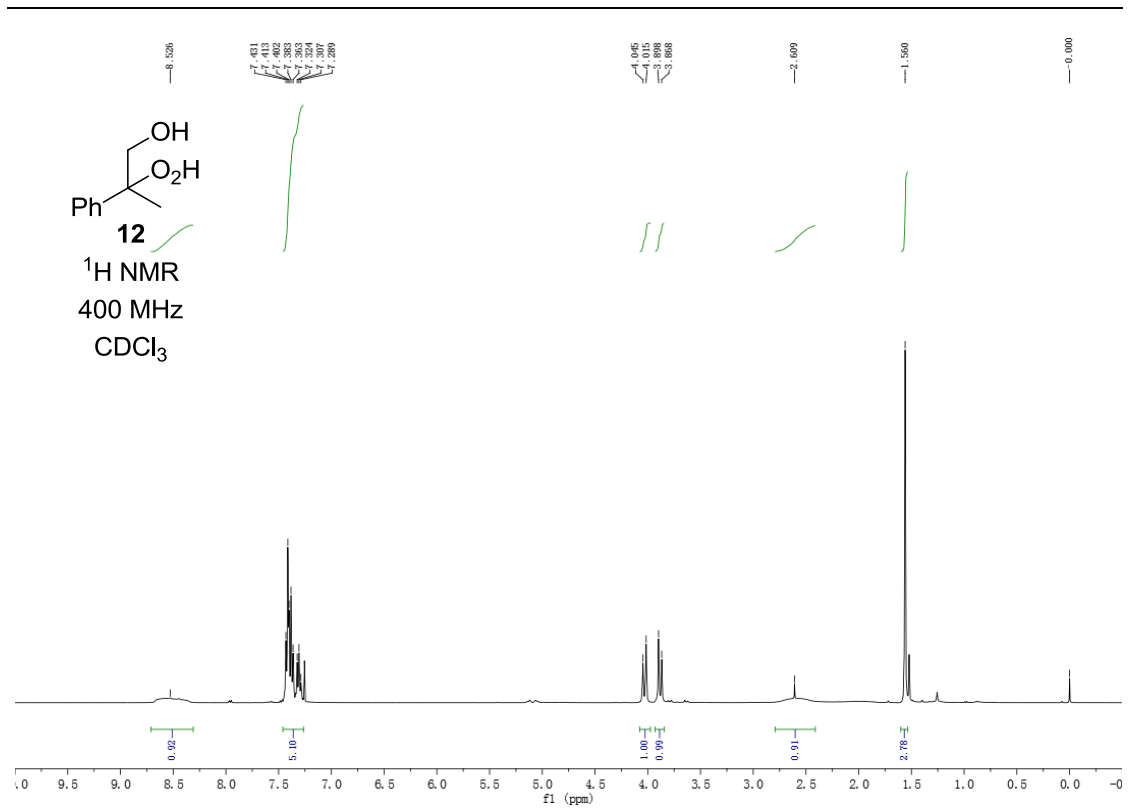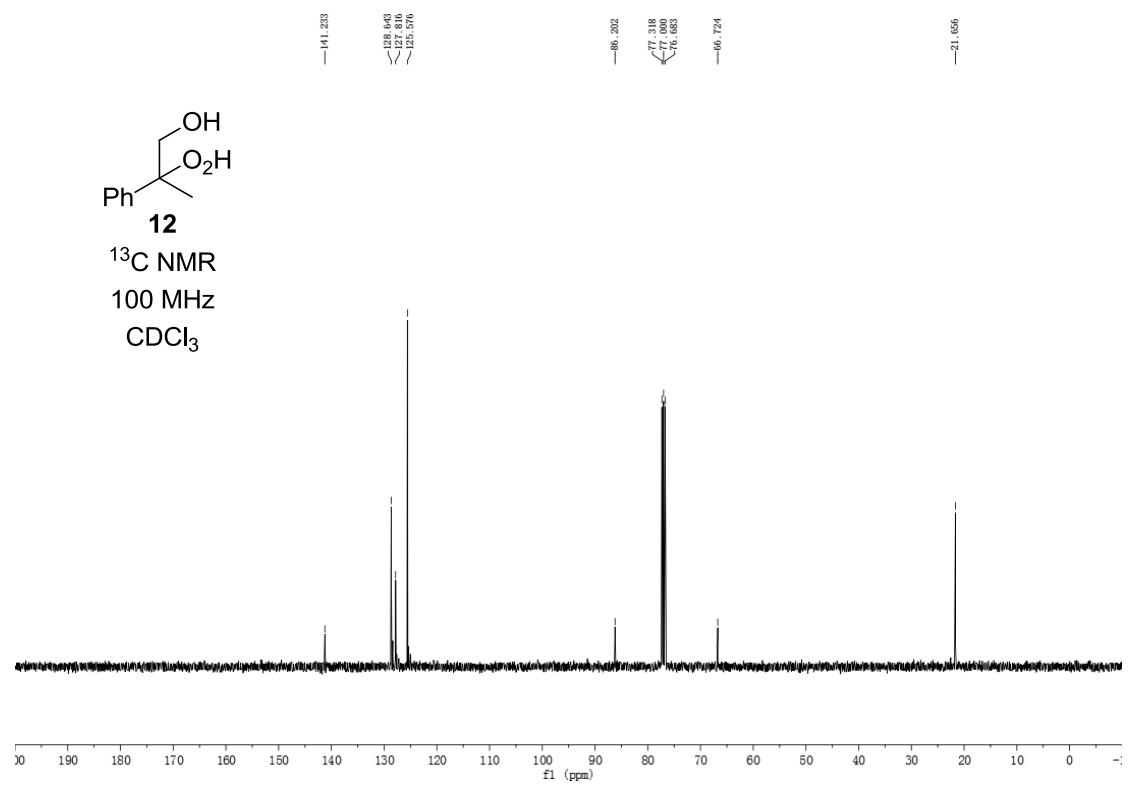

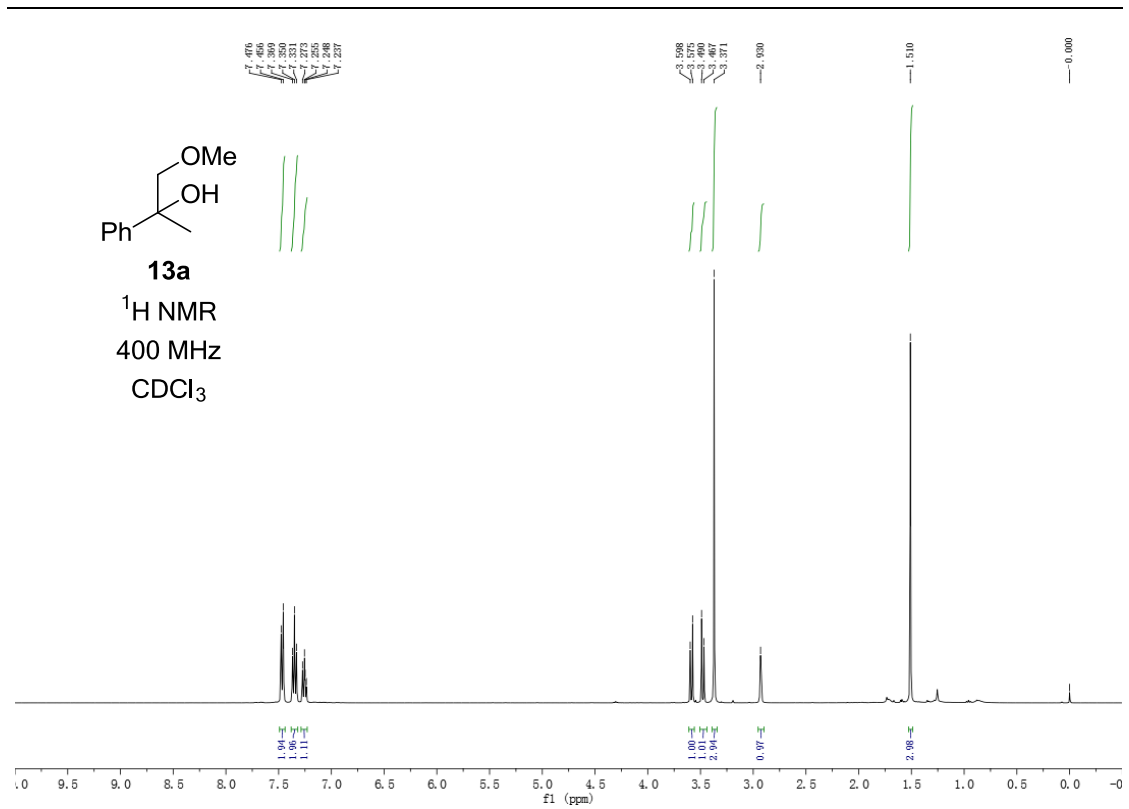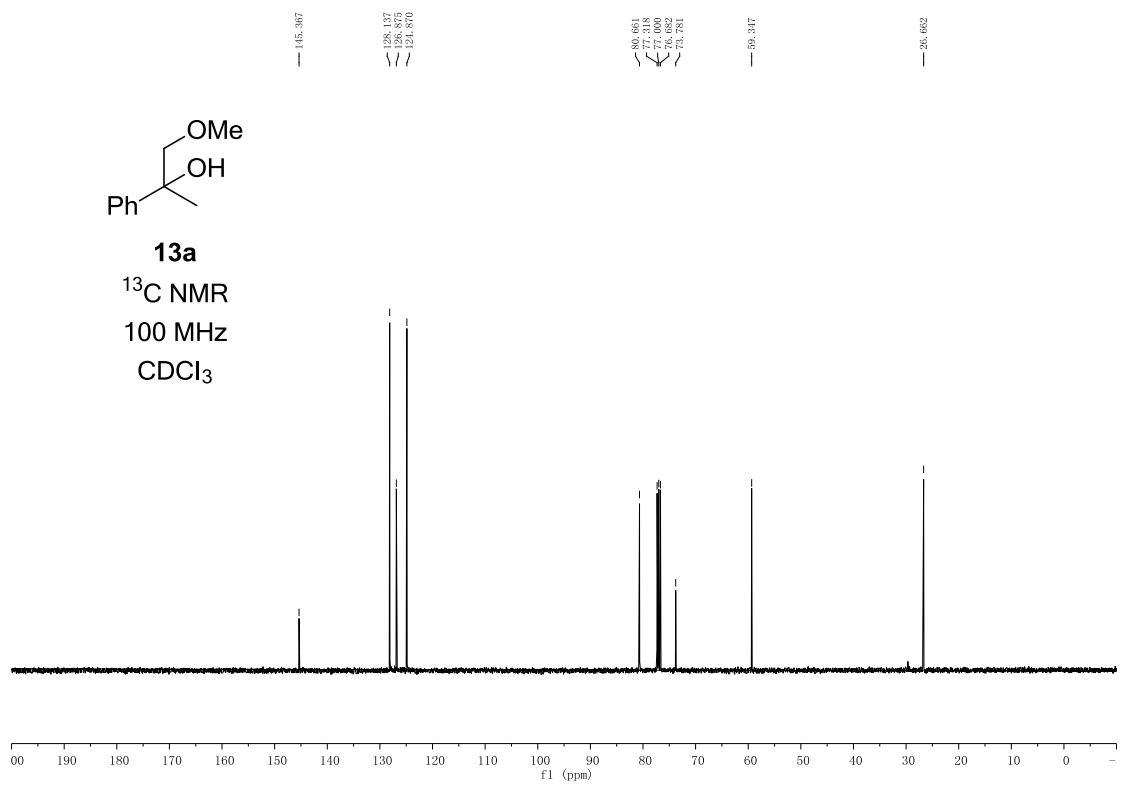

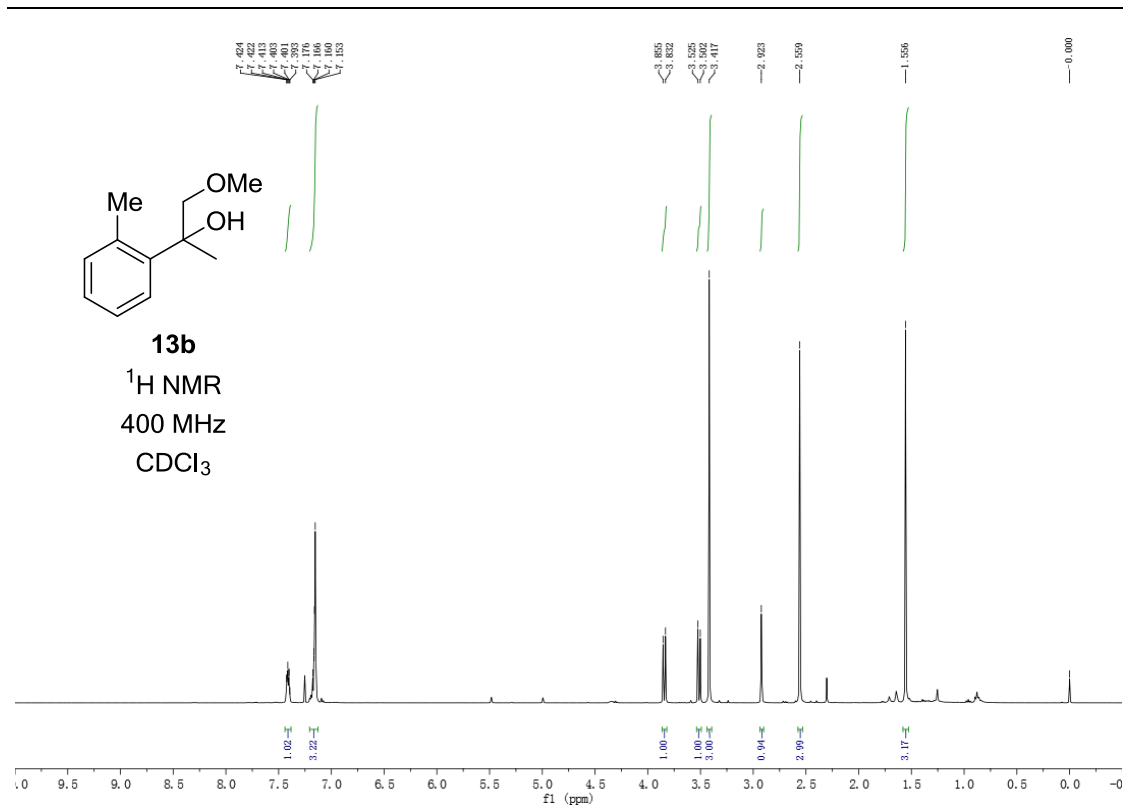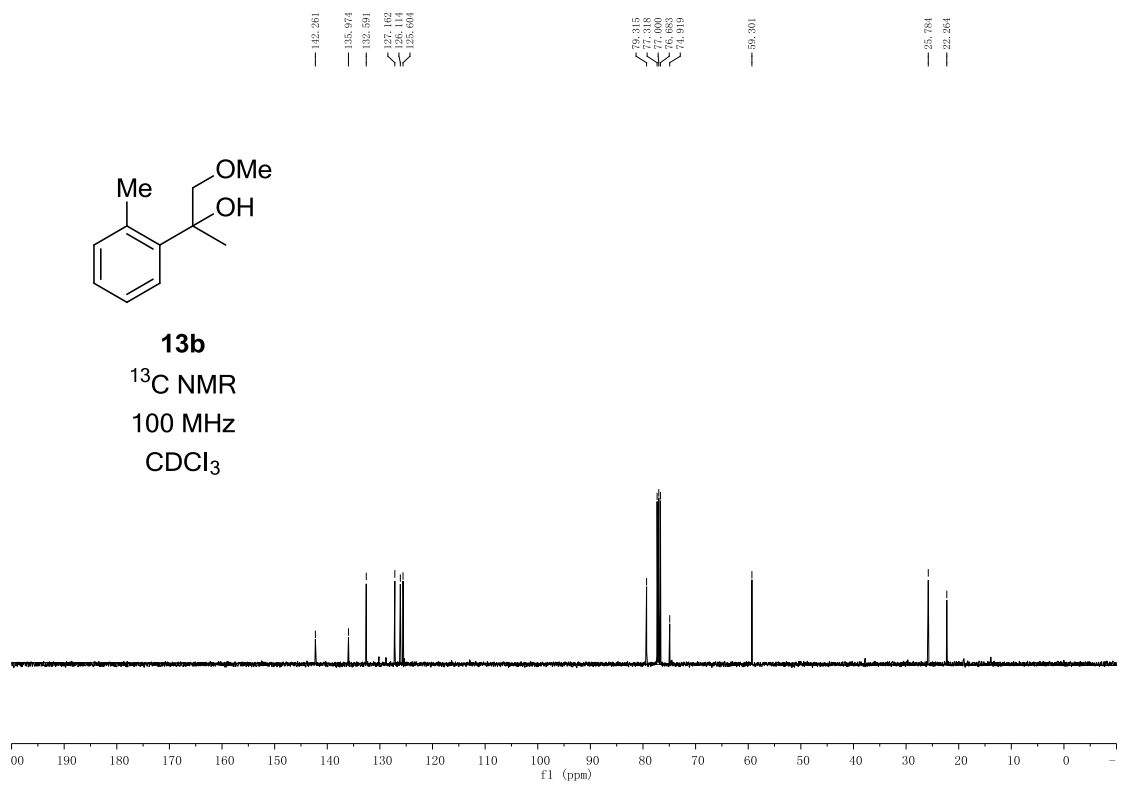

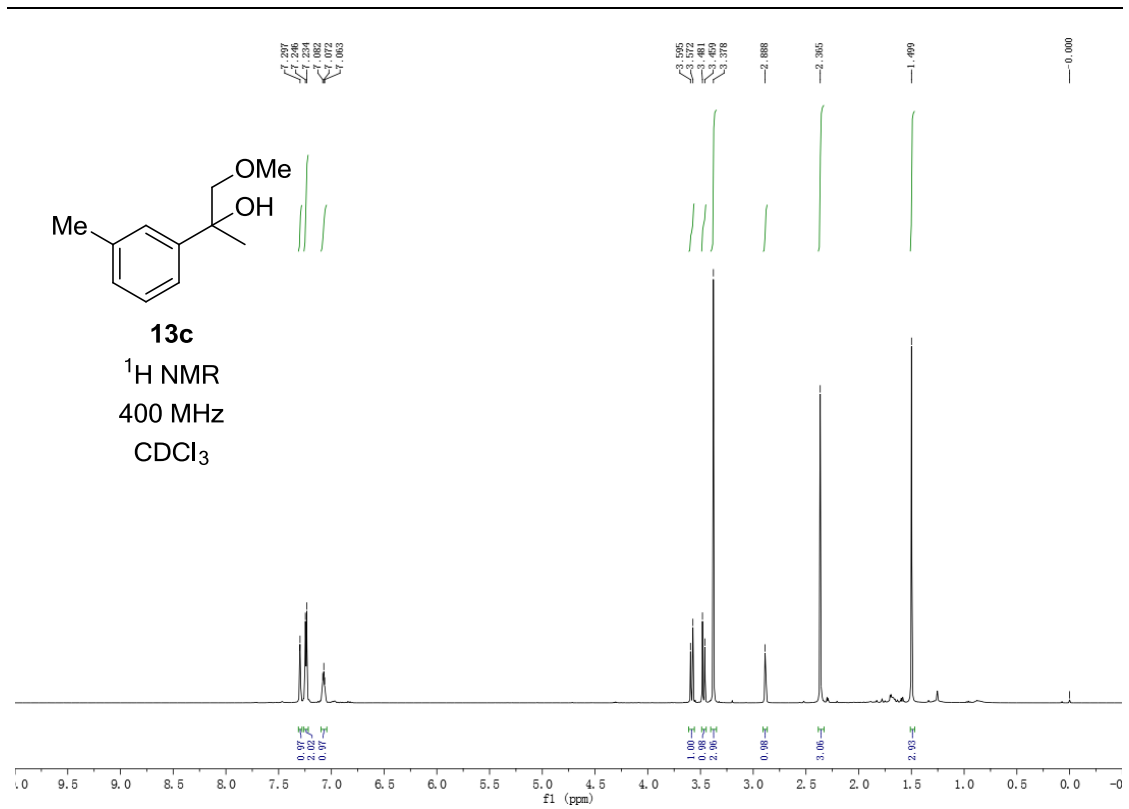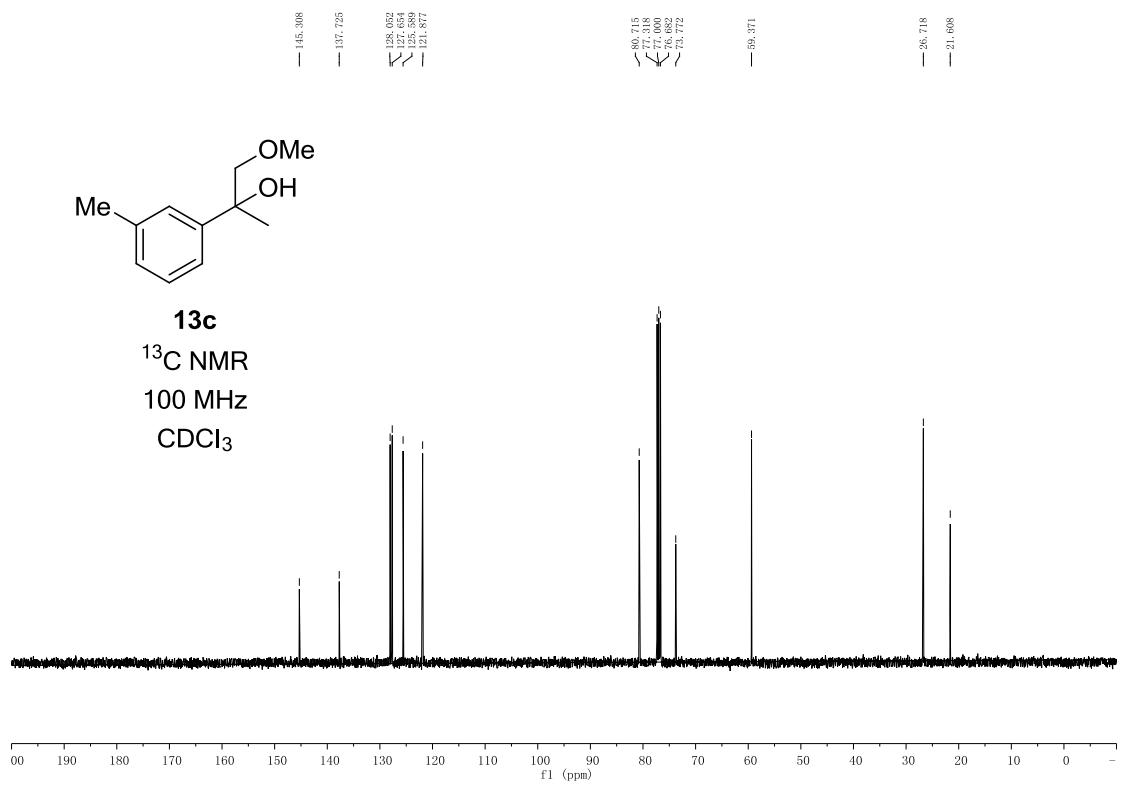

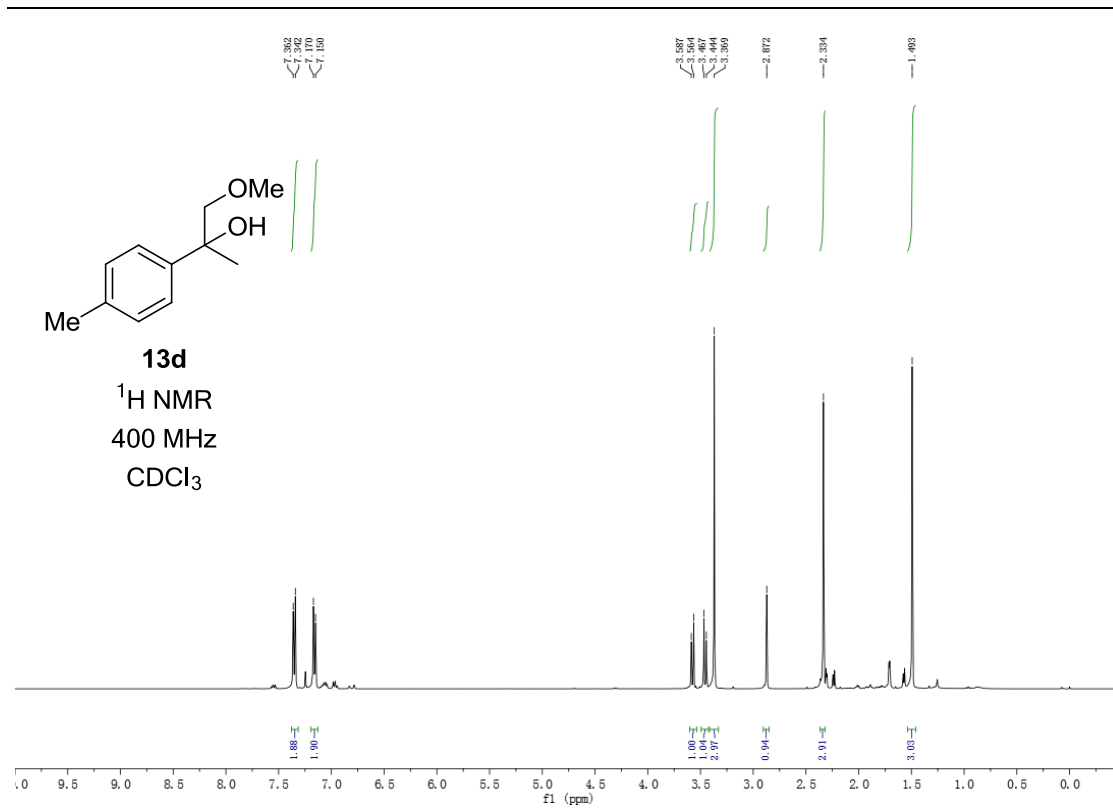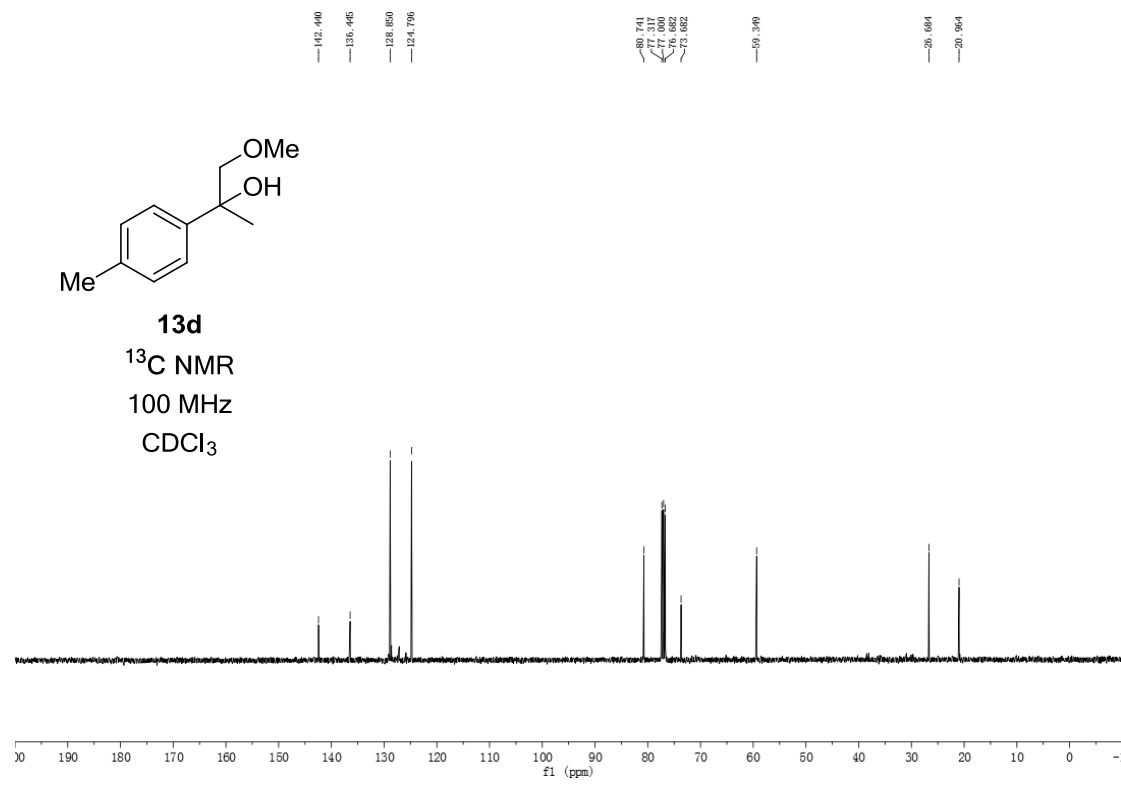

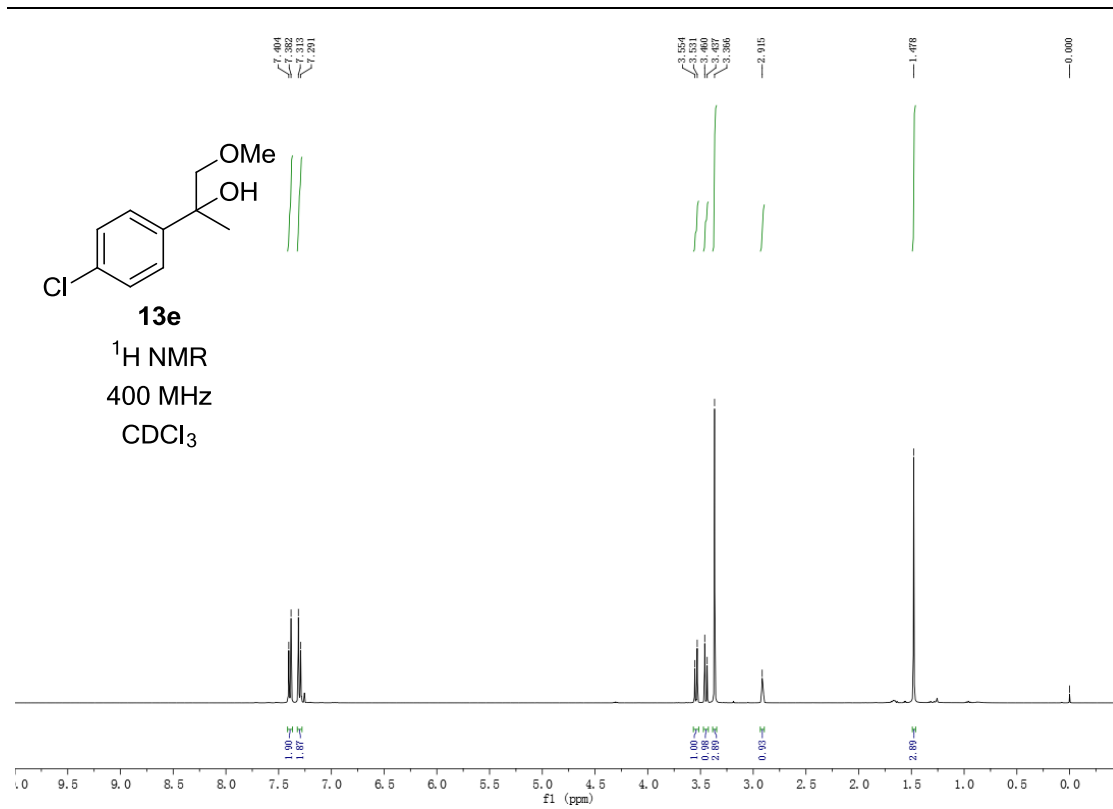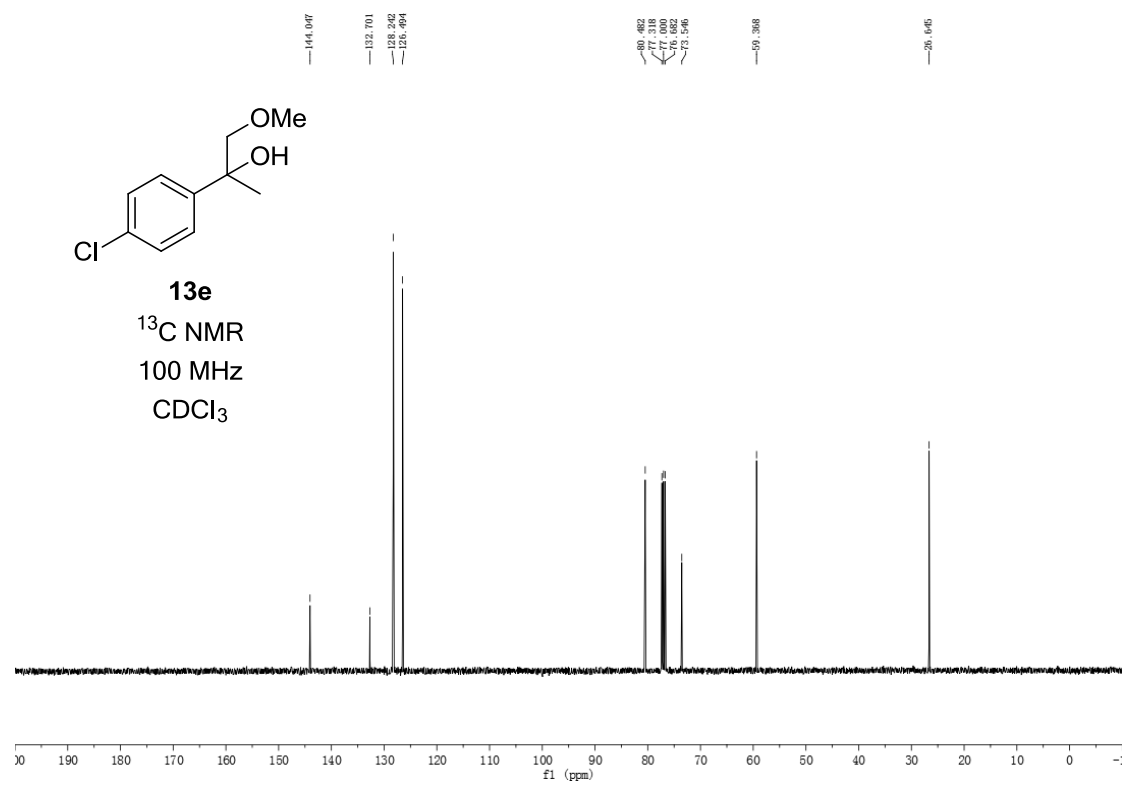



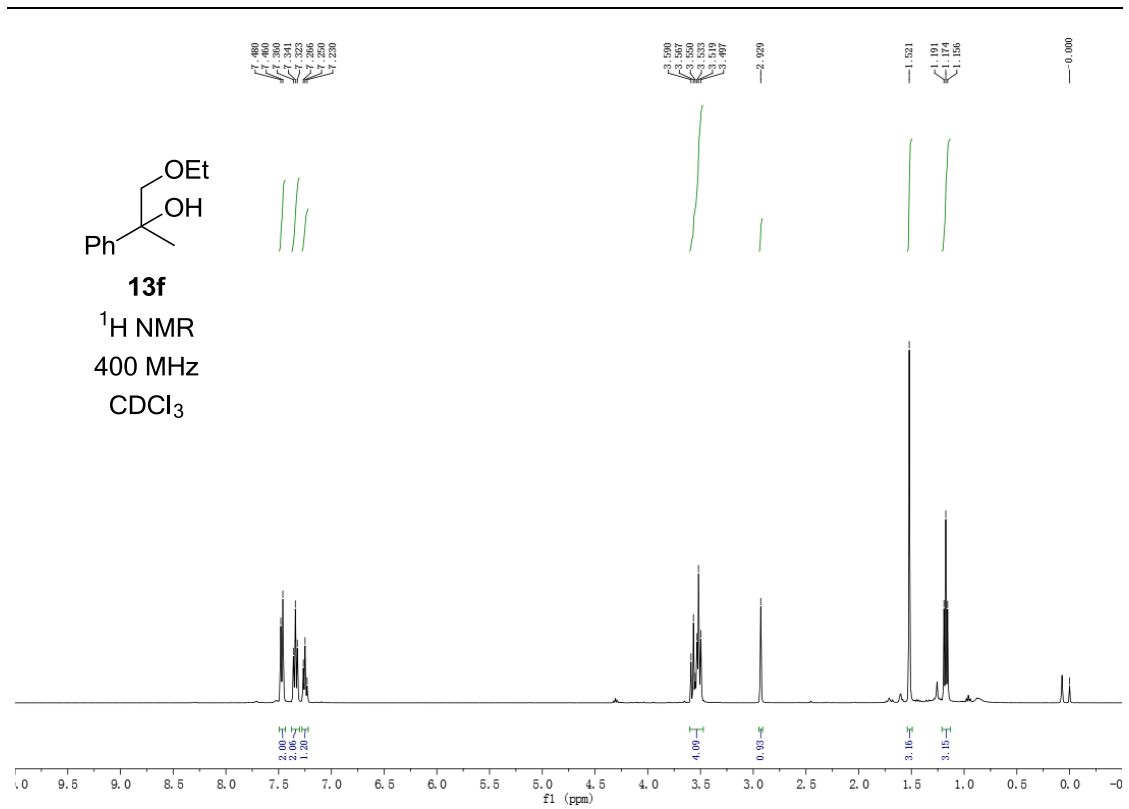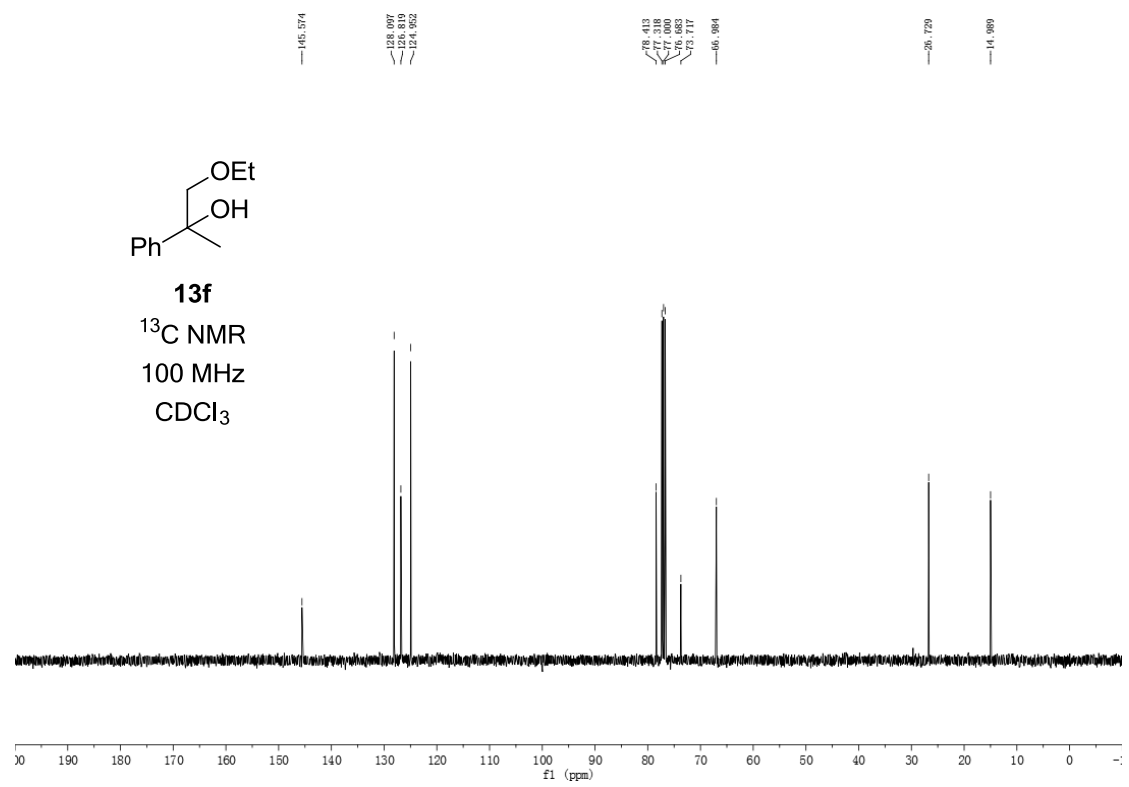

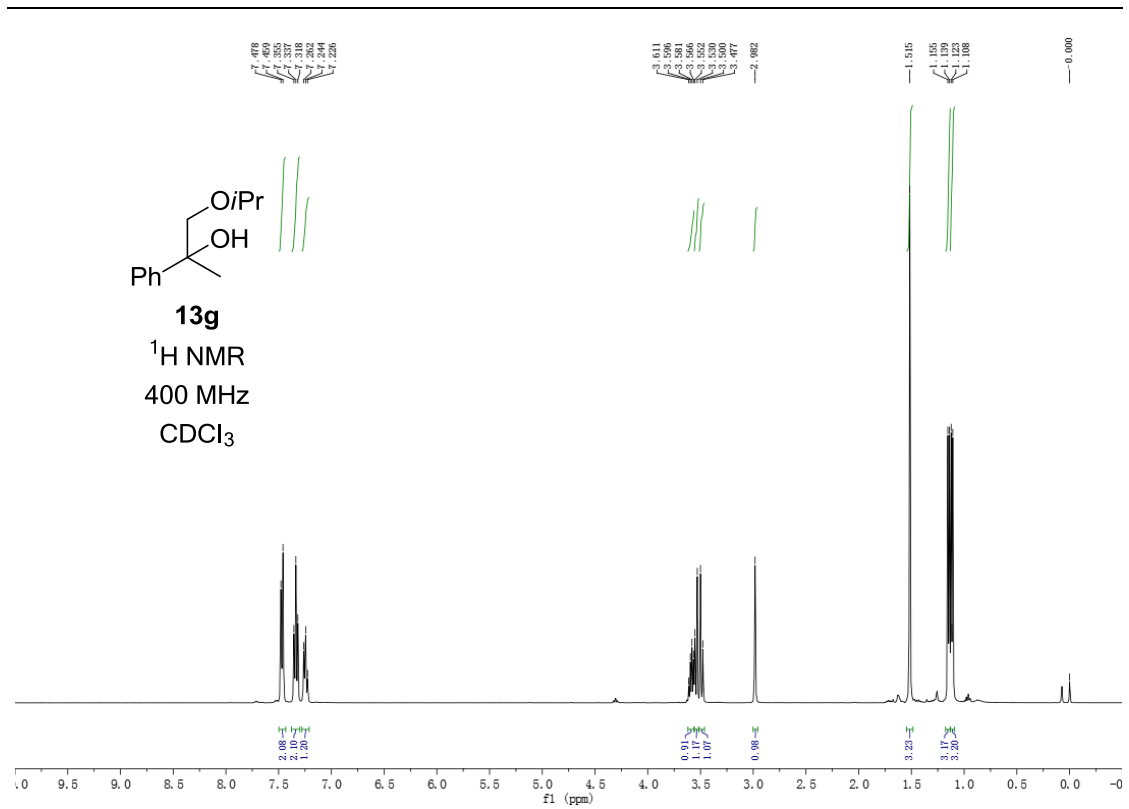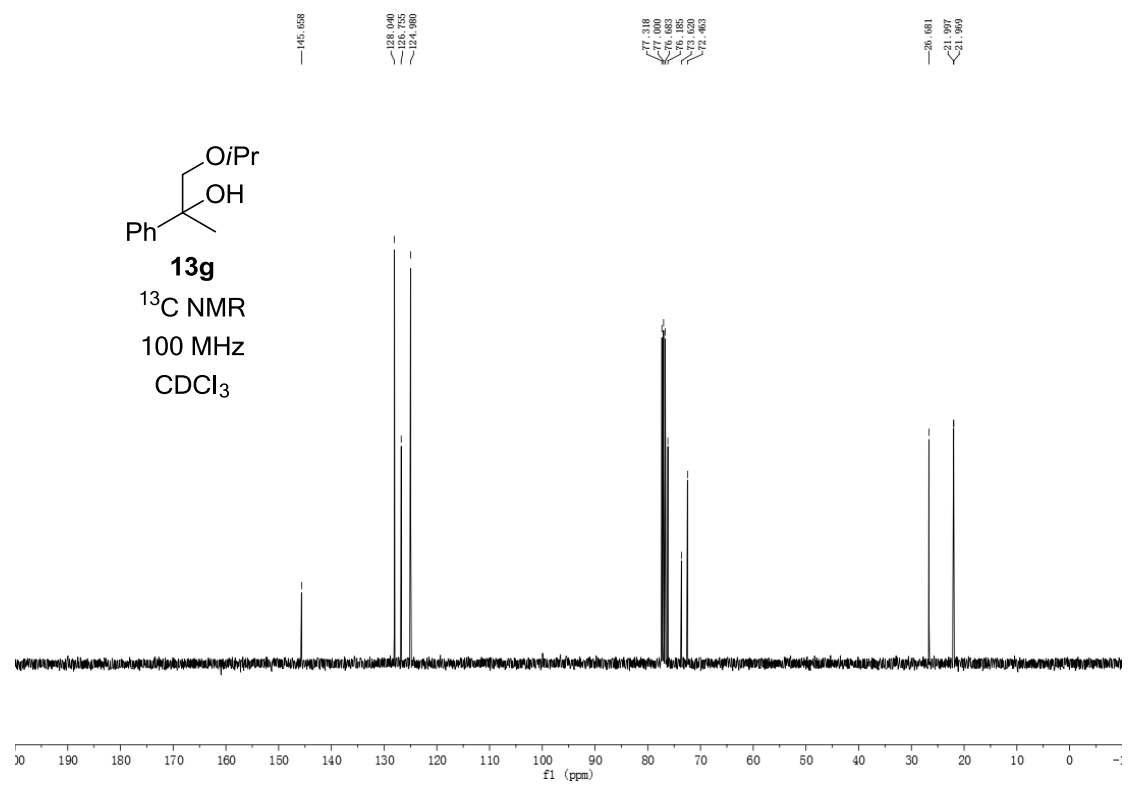

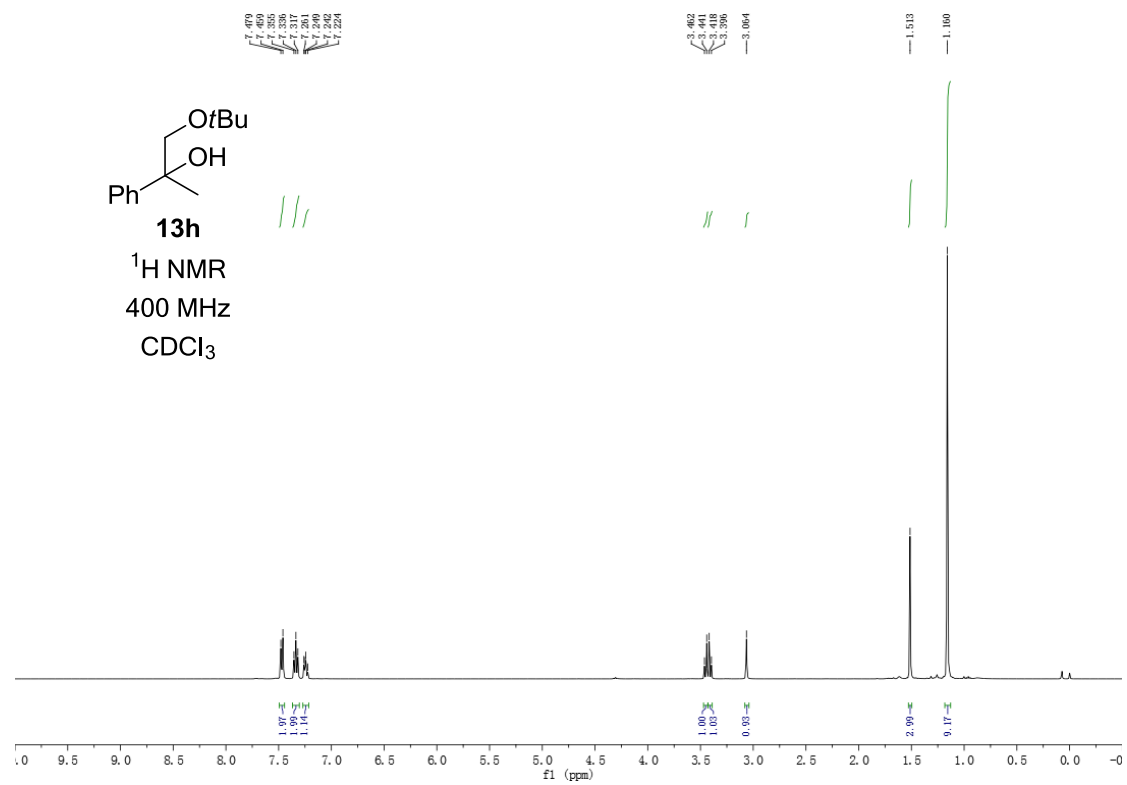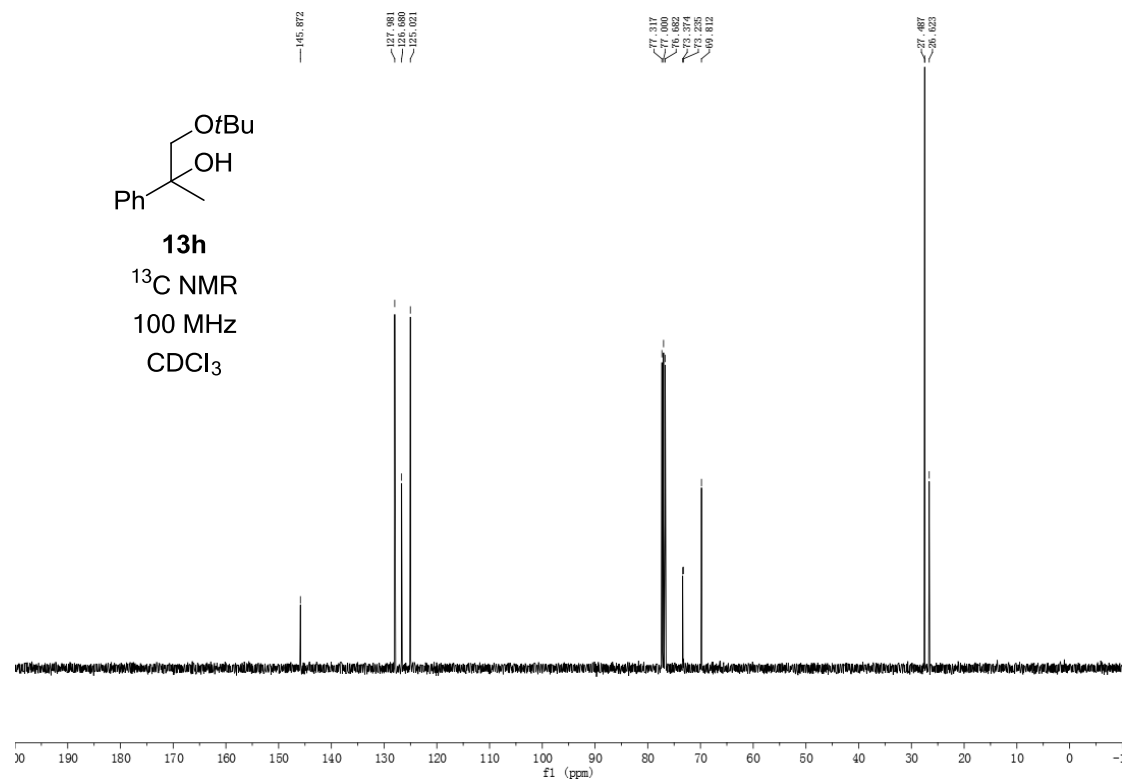

Supplement: c7cc06745c1.pdf [file c7cc06745c1.pdf]
